# Supplementary material for: Synthesis and mechanism of novel fluorescent coumarin–dihydropyrimidinone dyads obtained by the Biginelli multicomponent reaction
Source: Royal Society of Chemistry journal article supplement (doi:10.1039/c4nj02155j), 2015-01-01
Supplement: c4nj02155j1.pdf [file c4nj02155j1.pdf]

## New Journal of Chemistry

# Synthesis and mechanism of novel fluorescent coumarin-dihydropyrimidinone dyads obtained by Biginelli multicomponent reaction.

Felipe Vitório<sup>a,b</sup>, Thiago Moreira Pereira<sup>a</sup>, Rosane Nora Castro<sup>b</sup>, Guilherme Pereira Guedes<sup>b</sup>, Cedric Stephan Graebin<sup>a,b</sup> and Arthur Eugen Kummerle<sup>\*a,b</sup>

<sup>a</sup> Laboratório de Diversidade Molecular e Química Medicinal (LaDMol-QM, Molecular Diversity and Medicinal Chemistry Laboratory), Department of Chemistry, Universidade Federal Rural do Rio de Janeiro, Seropédica, Rio de Janeiro, 239897-000, Brazil.

<sup>b</sup> Programa de Pós-Graduação em Química (PPGQ), Universidade Federal Rural do Rio de Janeiro, Seropédica, Rio de Janeiro, 239897-000, Brazil.

Email: akummerle@ufrj.br

### Supporting Information

#### Contents

|                                                                                       |       |
|---------------------------------------------------------------------------------------|-------|
| Copies of <sup>1</sup> H , <sup>13</sup> CNMR and Mass Spectra for all products ----- | 2-43  |
| HPLC data analysis -----                                                              | 44-48 |
| Crystal Structure analysis -----                                                      | 49-50 |

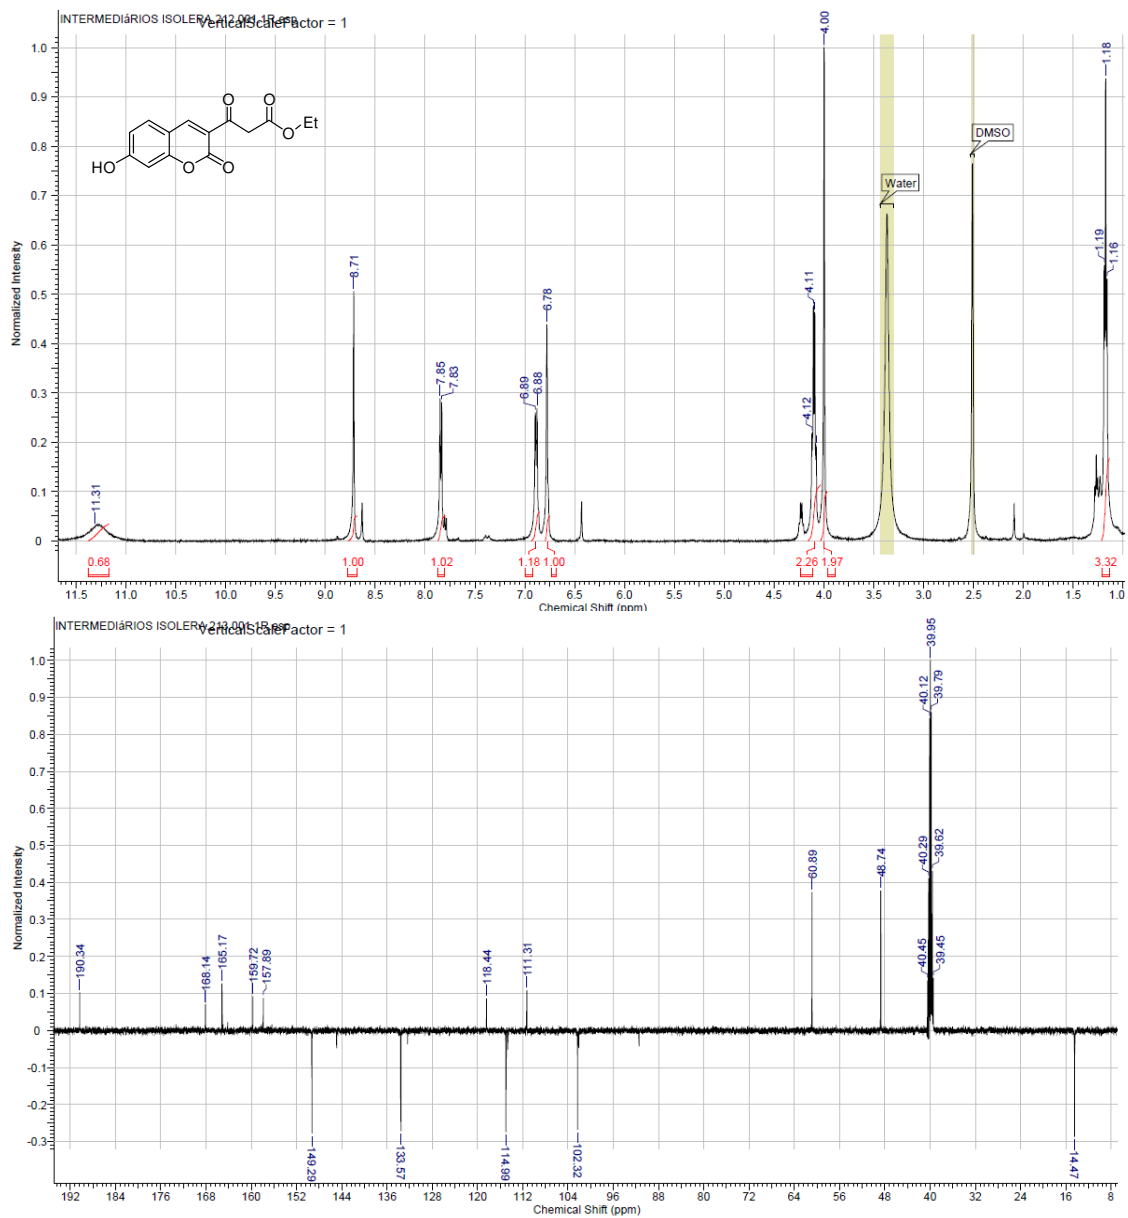

Fig. S1  $^1\text{H}$  NMR (500 MHz),  $^{13}\text{C}$  NMR (125 MHz) spectra of **3a** in  $\text{DMSO-}d_6$ .

**Acquisition Parameter**

|                   |             |              |           |                          |         |
|-------------------|-------------|--------------|-----------|--------------------------|---------|
| Ion Source Type   | ESI         | Ion Polarity | Negative  | Alternating Ion Polarity | off     |
| Mass Range Mode   | Enhanced    | Scan Begin   | 100 m/z   | Scan End                 | 700 m/z |
| Capillary Exit    | Resolution  | n/a          | n/a       | Trap Drive               | 68.9    |
| Accumulation Time | 175 $\mu$ s | Averages     | 5 Spectra | Auto MS/MS               | off     |

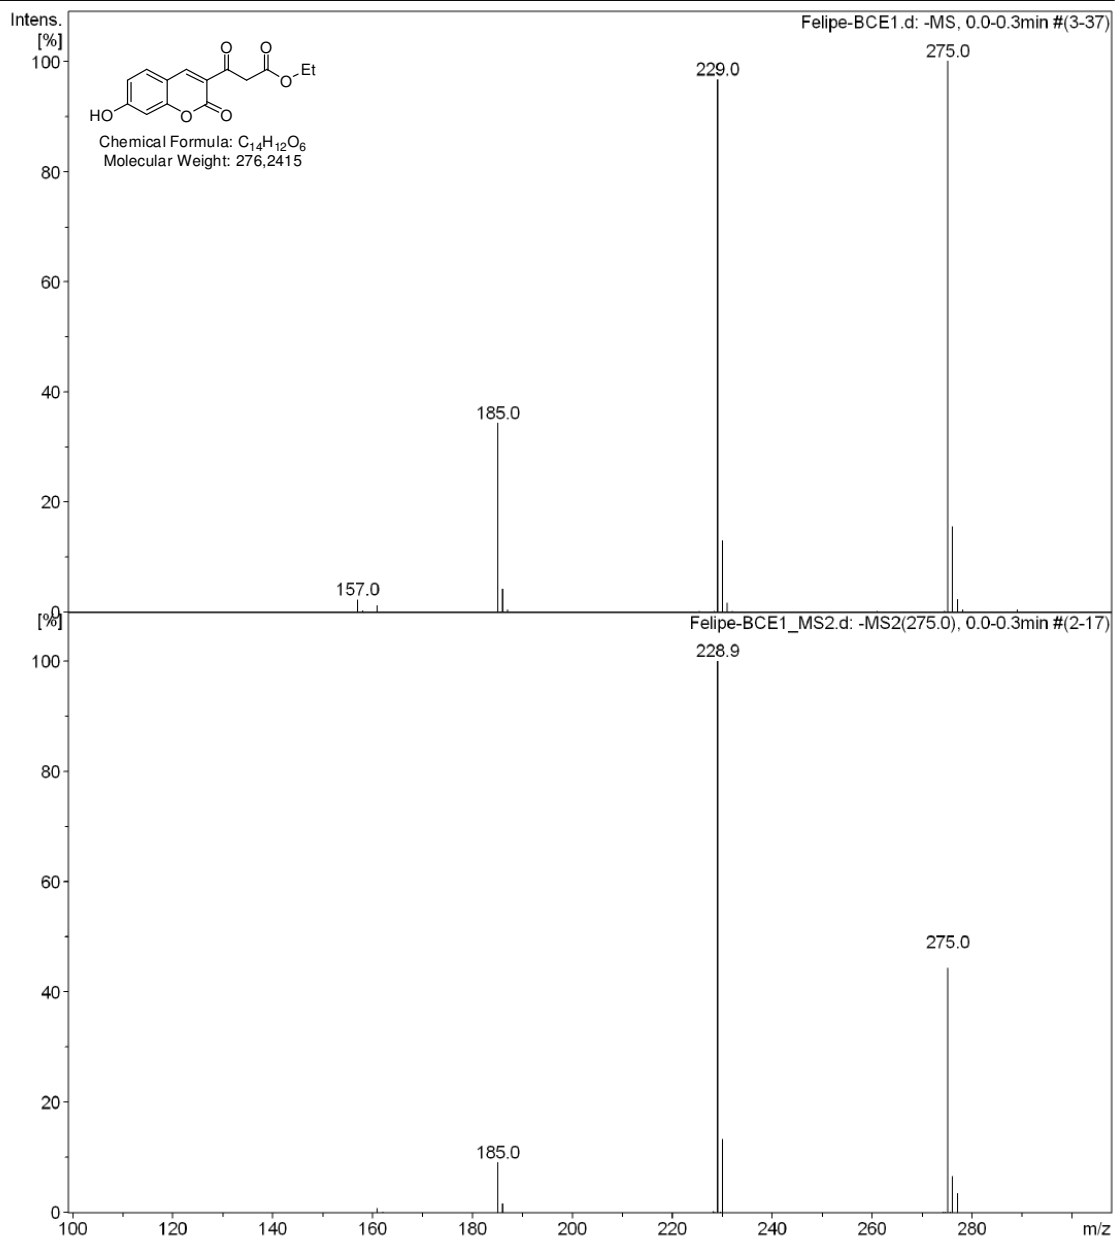Fig. S2 ESI spectra of **3a**.

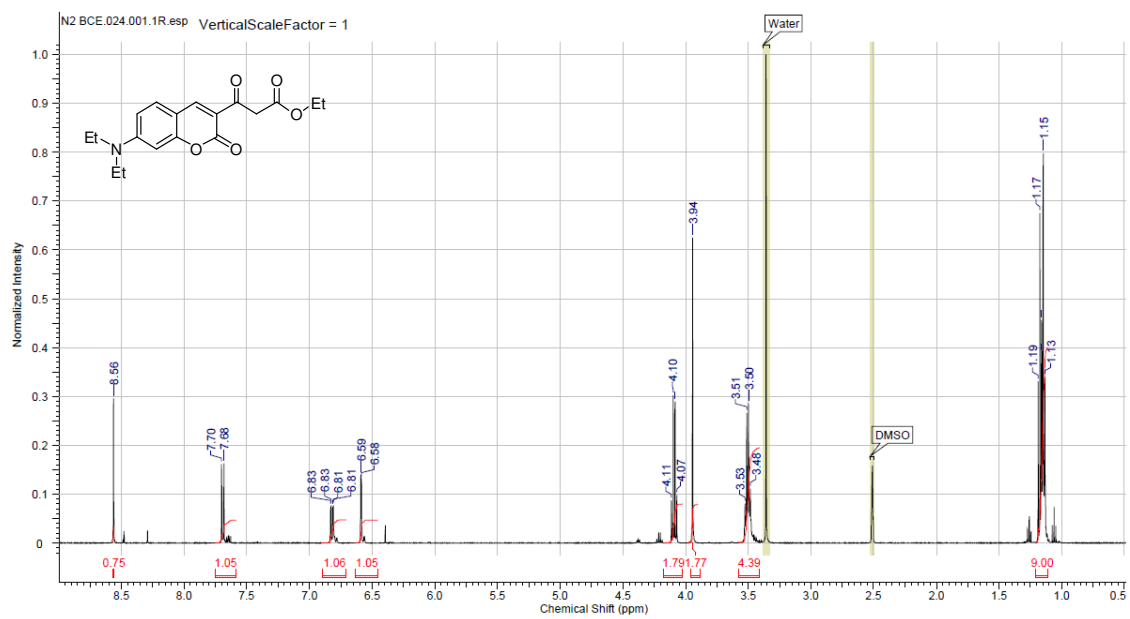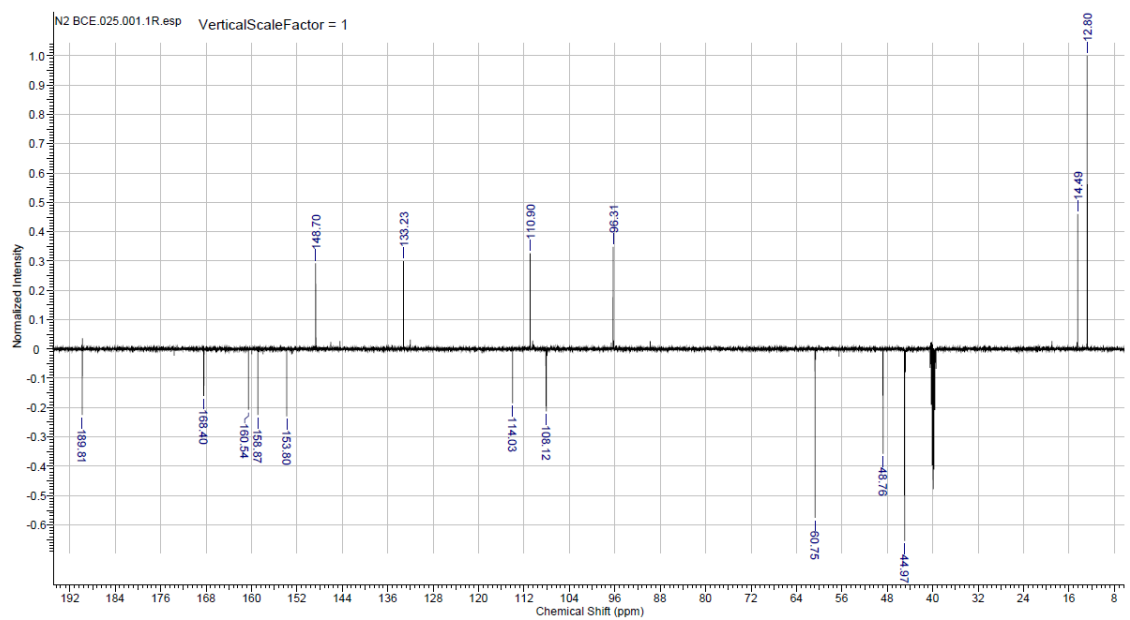

Fig. S3  $^1\text{H}$  NMR (500 MHz),  $^{13}\text{C}$  NMR (125 MHz) spectra of **3b** in DMSO- $d_6$ .

**Acquisition Parameter**

|                   |              |              |           |                          |         |
|-------------------|--------------|--------------|-----------|--------------------------|---------|
| Ion Source Type   | ESI          | Ion Polarity | Negative  | Alternating Ion Polarity | off     |
| Mass Range Mode   | Enhanced     | Scan Begin   | 100 m/z   | Scan End                 | 700 m/z |
| Capillary Exit    | Resolution   | n/a          | n/a       | Trap Drive               | 68.9    |
| Accumulation Time | 2130 $\mu$ s | Averages     | 5 Spectra | Auto MS/MS               | off     |

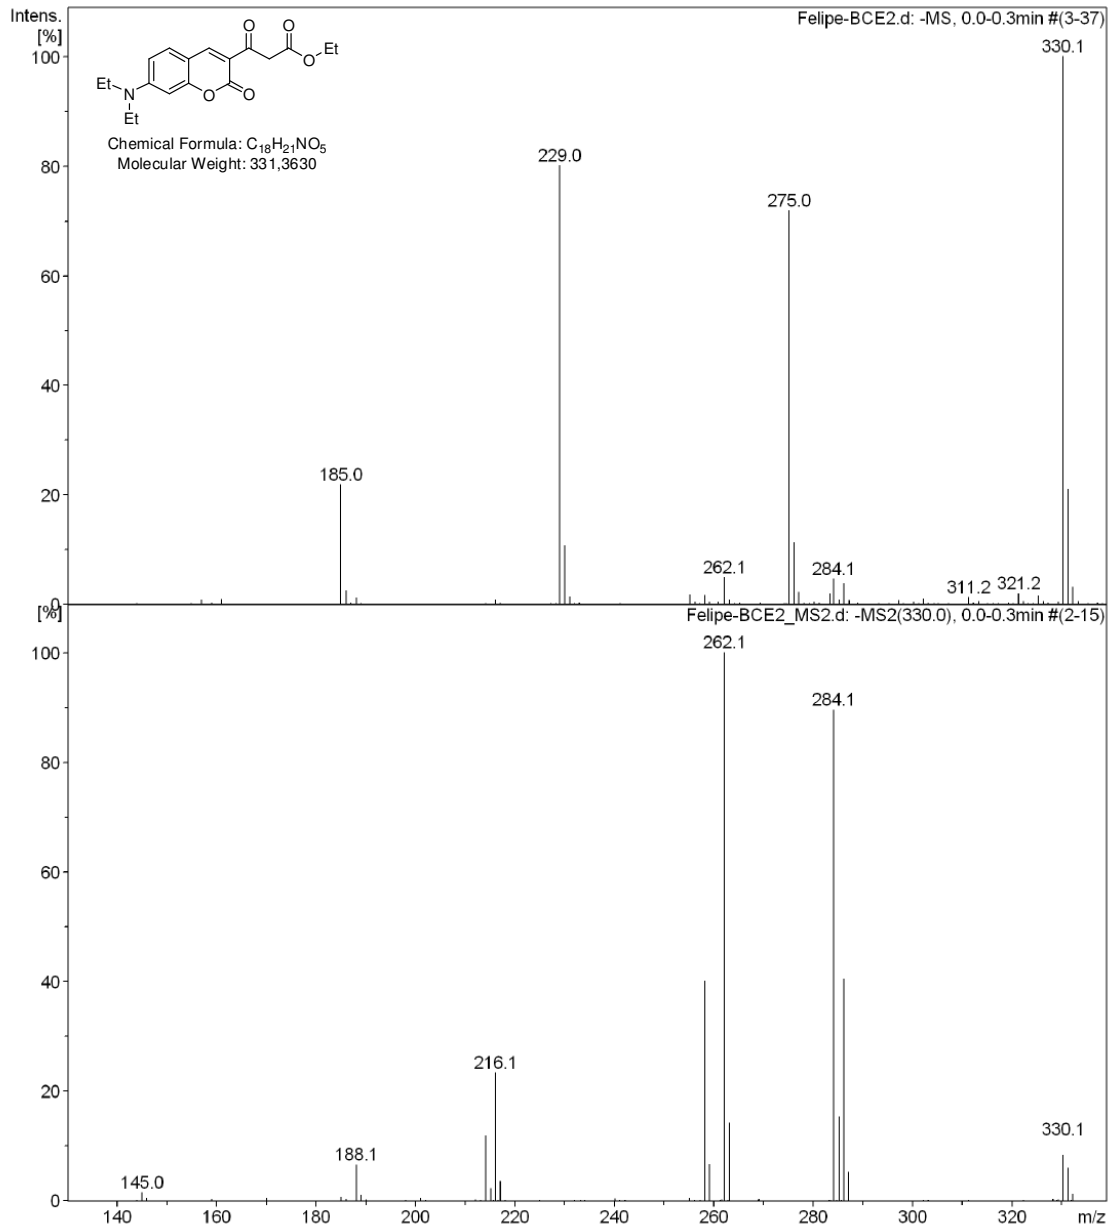

Fig. S4 ESI spectra of **3b**.

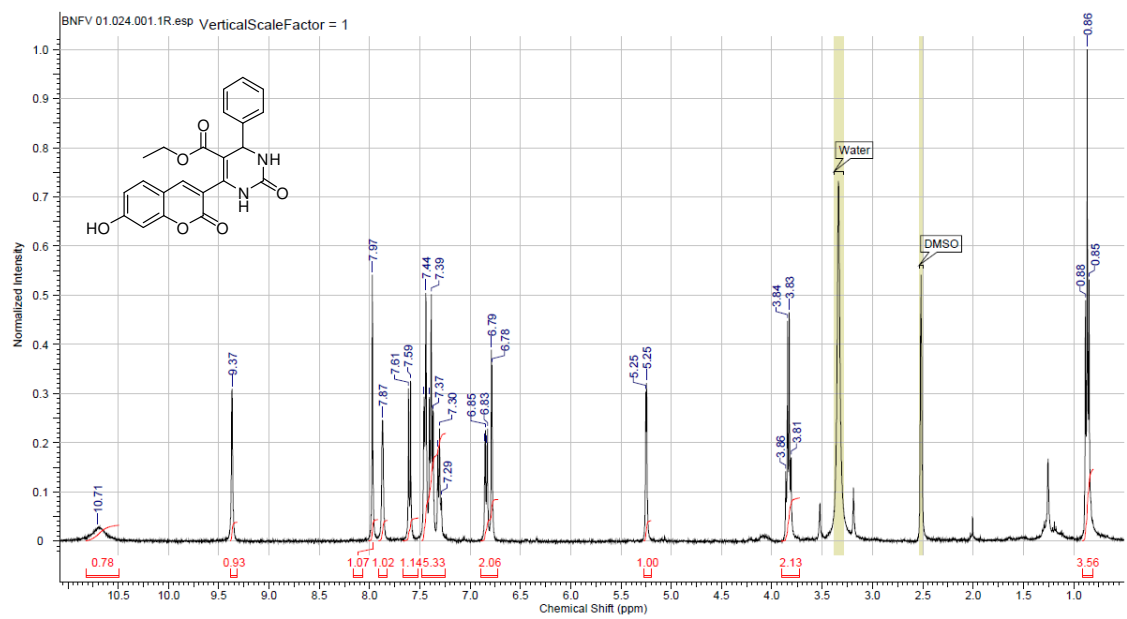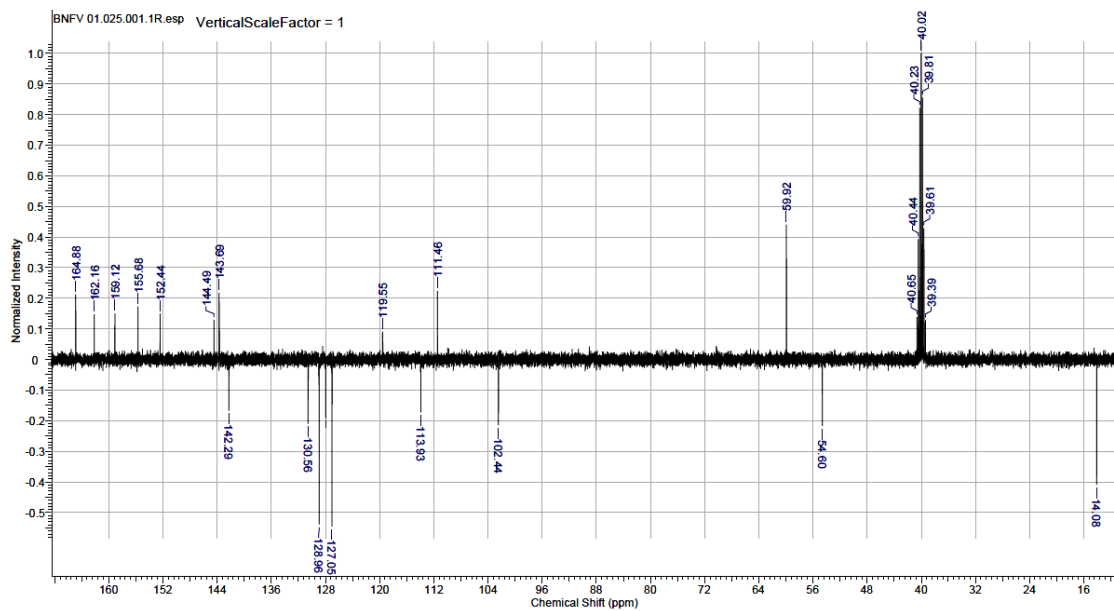

Fig. S5  $^1\text{H}$  NMR (400 MHz),  $^{13}\text{C}$  NMR (100 MHz) spectra of **4a** in  $\text{DMSO-}d_6$ .

**Acquisition Parameter**

|                   |             |              |           |                          |         |
|-------------------|-------------|--------------|-----------|--------------------------|---------|
| Ion Source Type   | ESI         | Ion Polarity | Negative  | Alternating Ion Polarity | off     |
| Mass Range Mode   | Enhanced    | Scan Begin   | 100 m/z   | Scan End                 | 700 m/z |
| Capillary Exit    | Resolution  | n/a          | n/a       | Trap Drive               | 68.9    |
| Accumulation Time | 219 $\mu$ s | Averages     | 5 Spectra | Auto MS/MS               | off     |

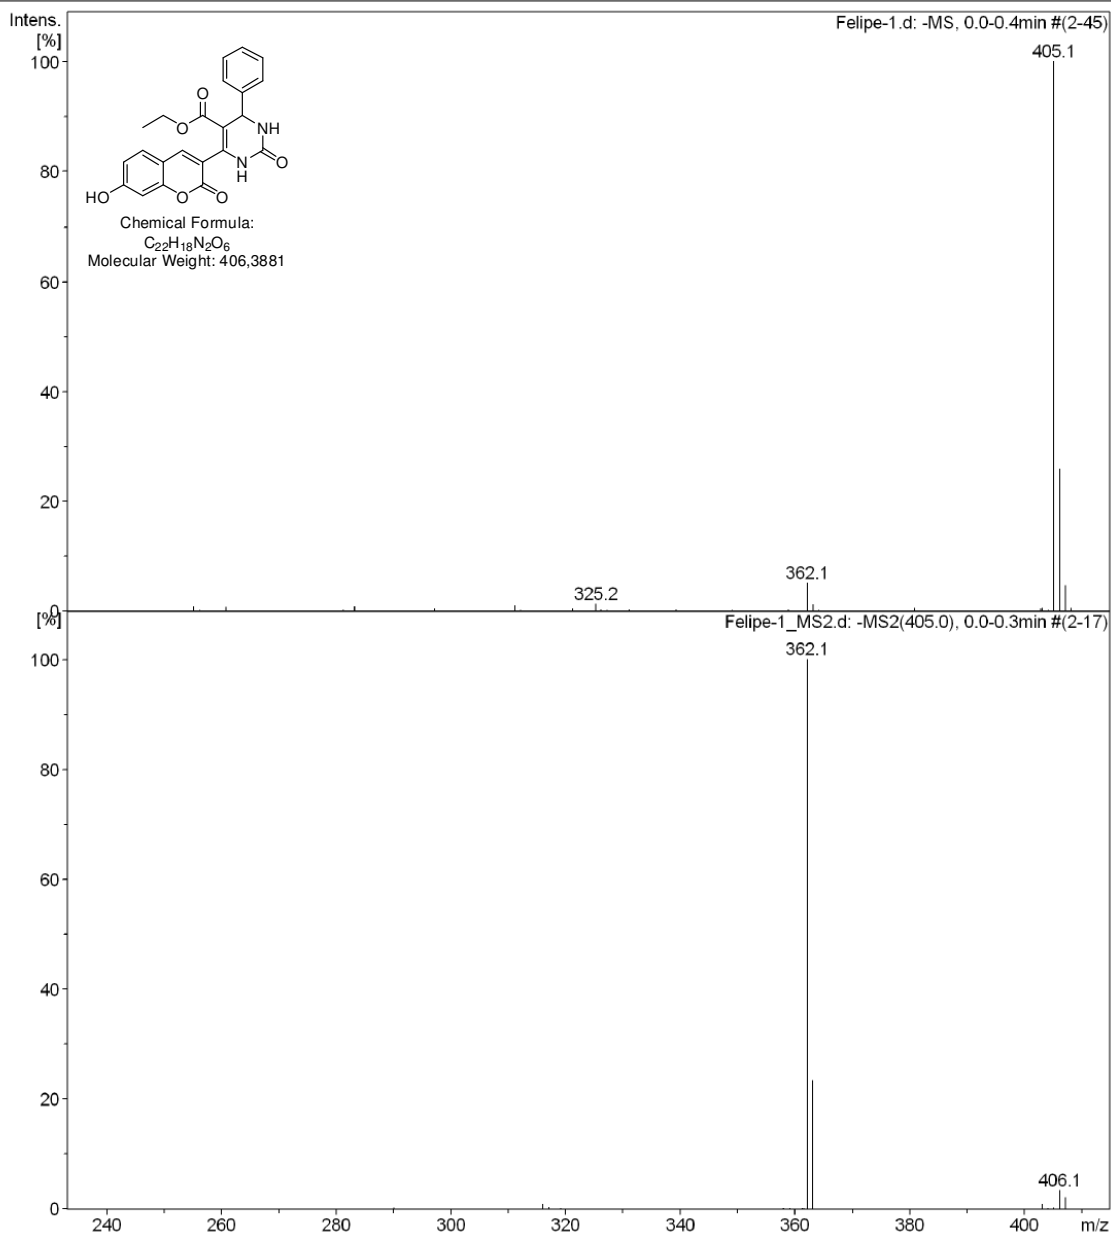Fig. S6 ESI spectra of **4a**.

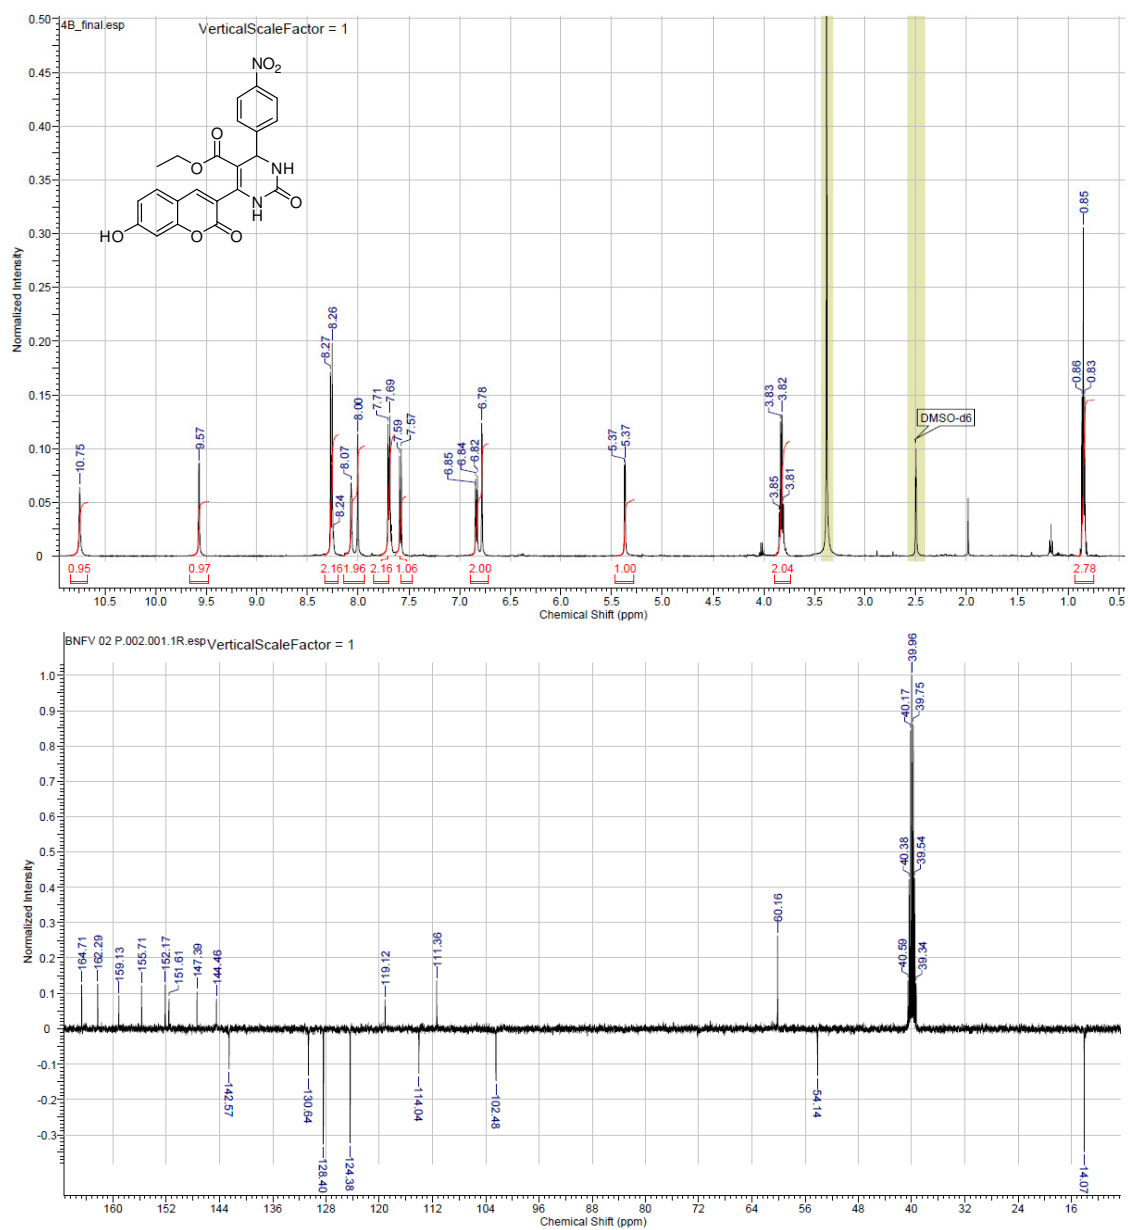

Fig. S7 <sup>1</sup>H NMR (400 MHz), <sup>13</sup>C NMR (100 MHz) spectra of **4b** in DMSO-d<sub>6</sub>.



**Acquisition Parameter**

|                   |               |              |           |                          |         |
|-------------------|---------------|--------------|-----------|--------------------------|---------|
| Ion Source Type   | ESI           | Ion Polarity | Negative  | Alternating Ion Polarity | off     |
| Mass Range Mode   | Enhanced      | Scan Begin   | 100 m/z   | Scan End                 | 700 m/z |
| Capillary Exit    | Resolution    | n/a          | n/a       | Trap Drive               | 68.9    |
| Accumulation Time | 13906 $\mu$ s | Averages     | 5 Spectra | Auto MS/MS               | off     |

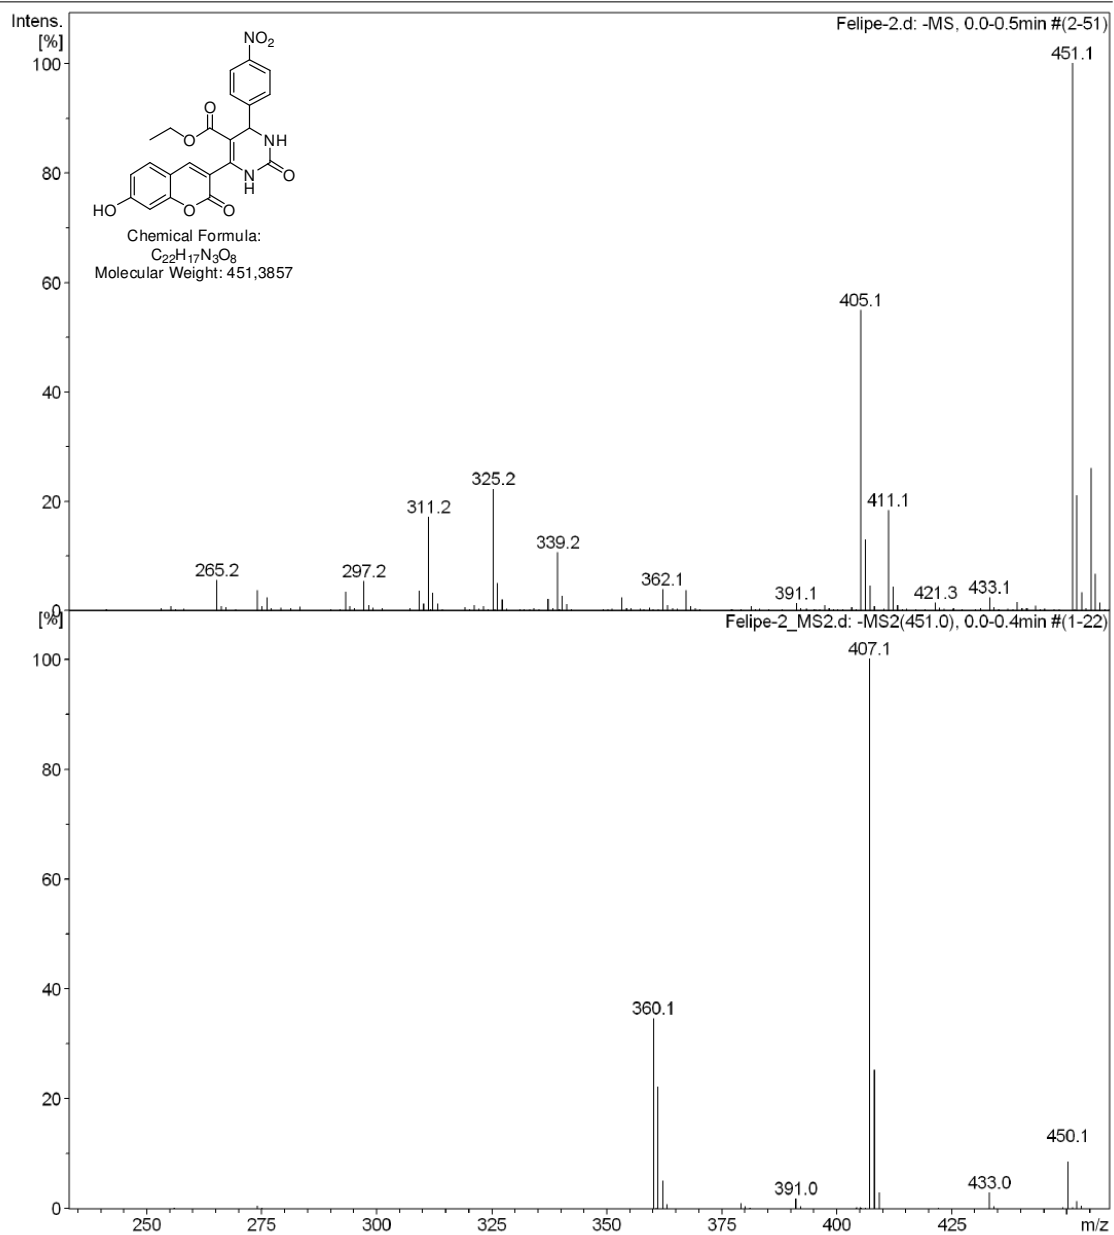Fig. S8 ESI spectra of **4b**.

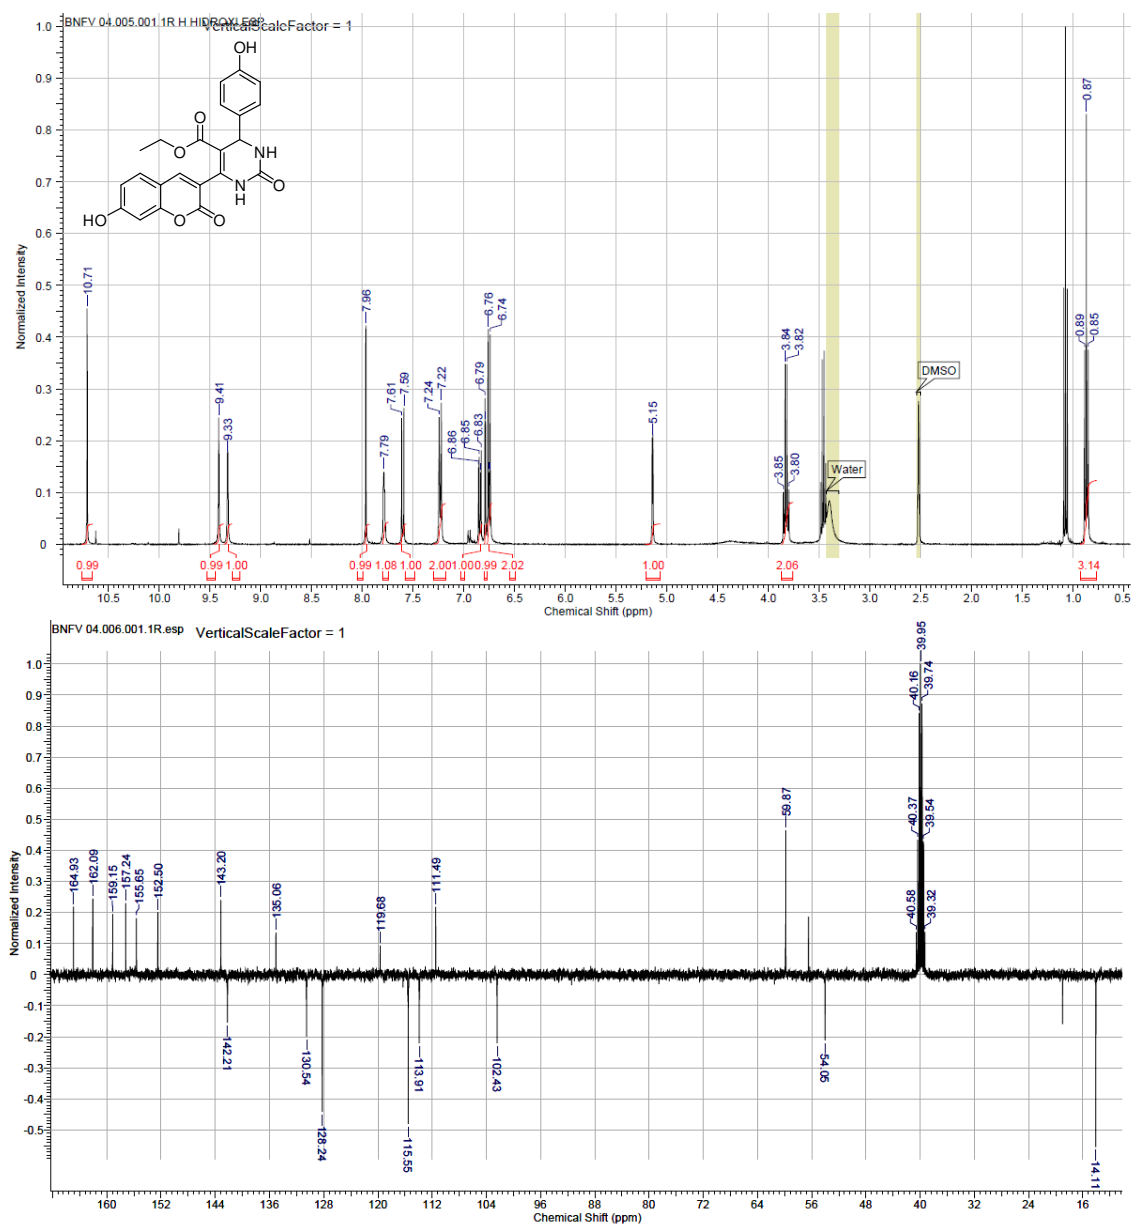

Fig. S9 <sup>1</sup>H NMR (400 MHz), <sup>13</sup>C NMR (100 MHz) spectra of 4c in DMSO-d<sub>6</sub>.

**Acquisition Parameter**

|                   |             |              |           |                          |         |
|-------------------|-------------|--------------|-----------|--------------------------|---------|
| Ion Source Type   | ESI         | Ion Polarity | Negative  | Alternating Ion Polarity | off     |
| Mass Range Mode   | Enhanced    | Scan Begin   | 100 m/z   | Scan End                 | 700 m/z |
| Capillary Exit    | Resolution  | n/a          | n/a       | Trap Drive               | 68.9    |
| Accumulation Time | 332 $\mu$ s | Averages     | 5 Spectra | Auto MS/MS               | off     |

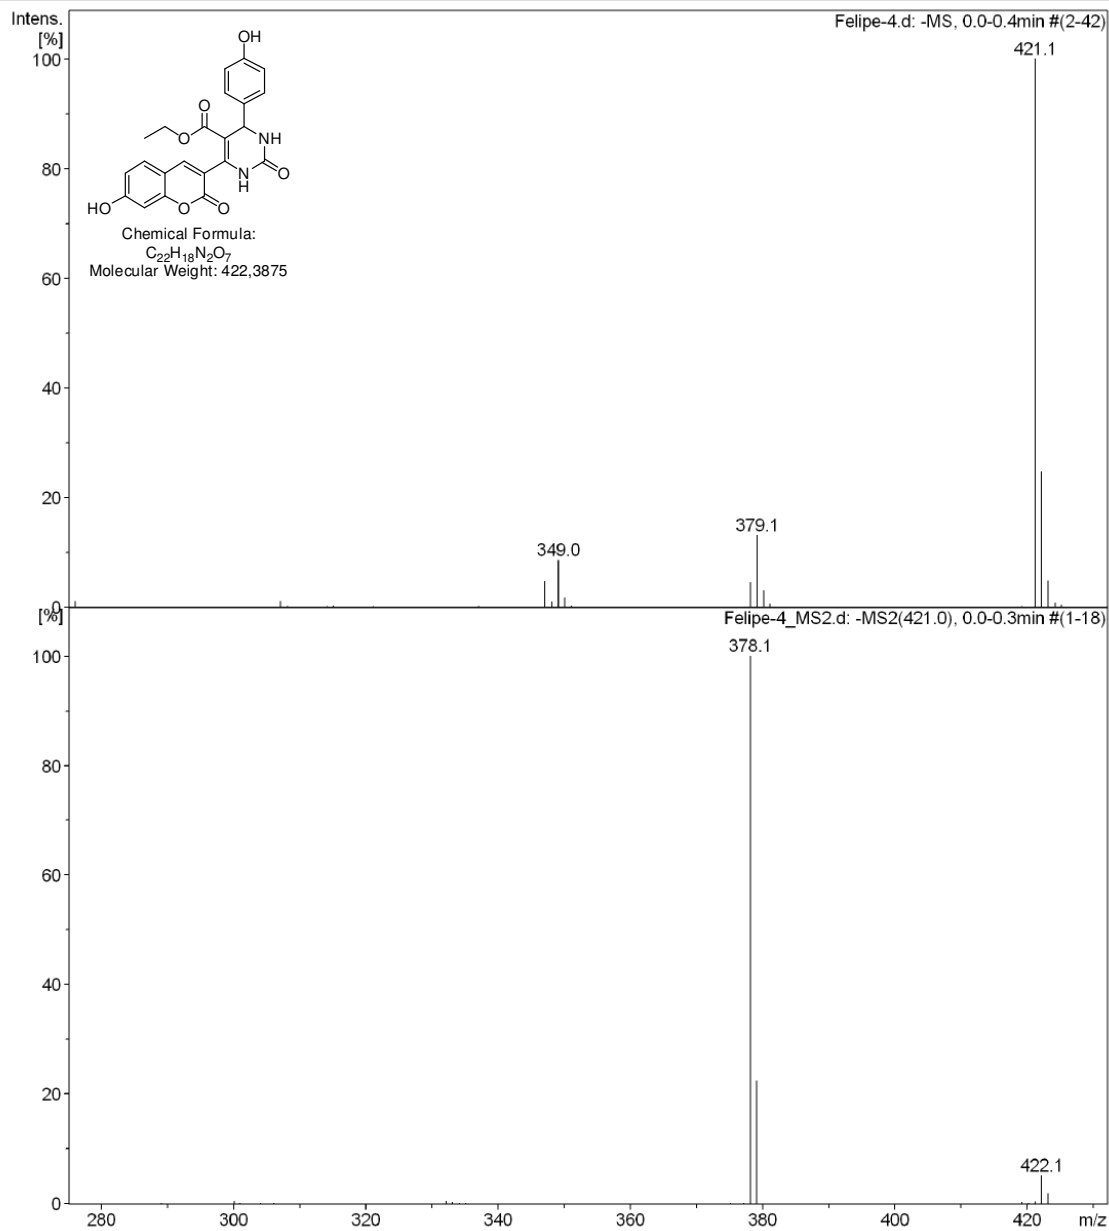Fig. S10 ESI spectra of **4c**.

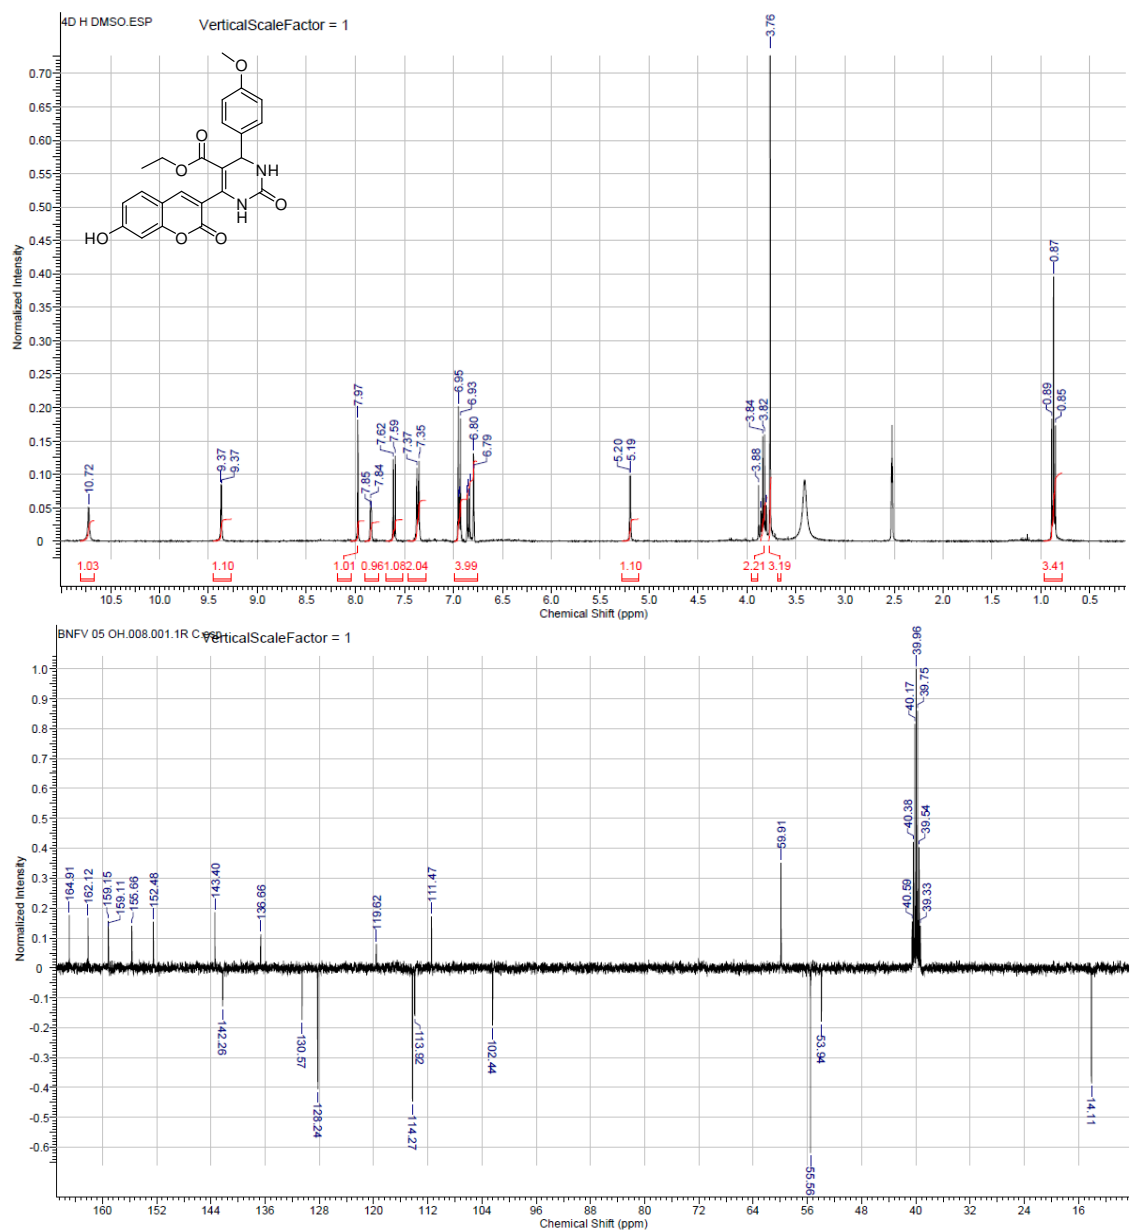

Fig. S11  $^1\text{H}$  NMR (400 MHz),  $^{13}\text{C}$  NMR (100 MHz) spectra of **4d** in DMSO- $d_6$ .

**Acquisition Parameter**

|                   |             |              |           |                          |         |
|-------------------|-------------|--------------|-----------|--------------------------|---------|
| Ion Source Type   | ESI         | Ion Polarity | Negative  | Alternating Ion Polarity | off     |
| Mass Range Mode   | Enhanced    | Scan Begin   | 100 m/z   | Scan End                 | 700 m/z |
| Capillary Exit    | Resolution  | n/a          | n/a       | Trap Drive               | 68.9    |
| Accumulation Time | 139 $\mu$ s | Averages     | 5 Spectra | Auto MS/MS               | off     |

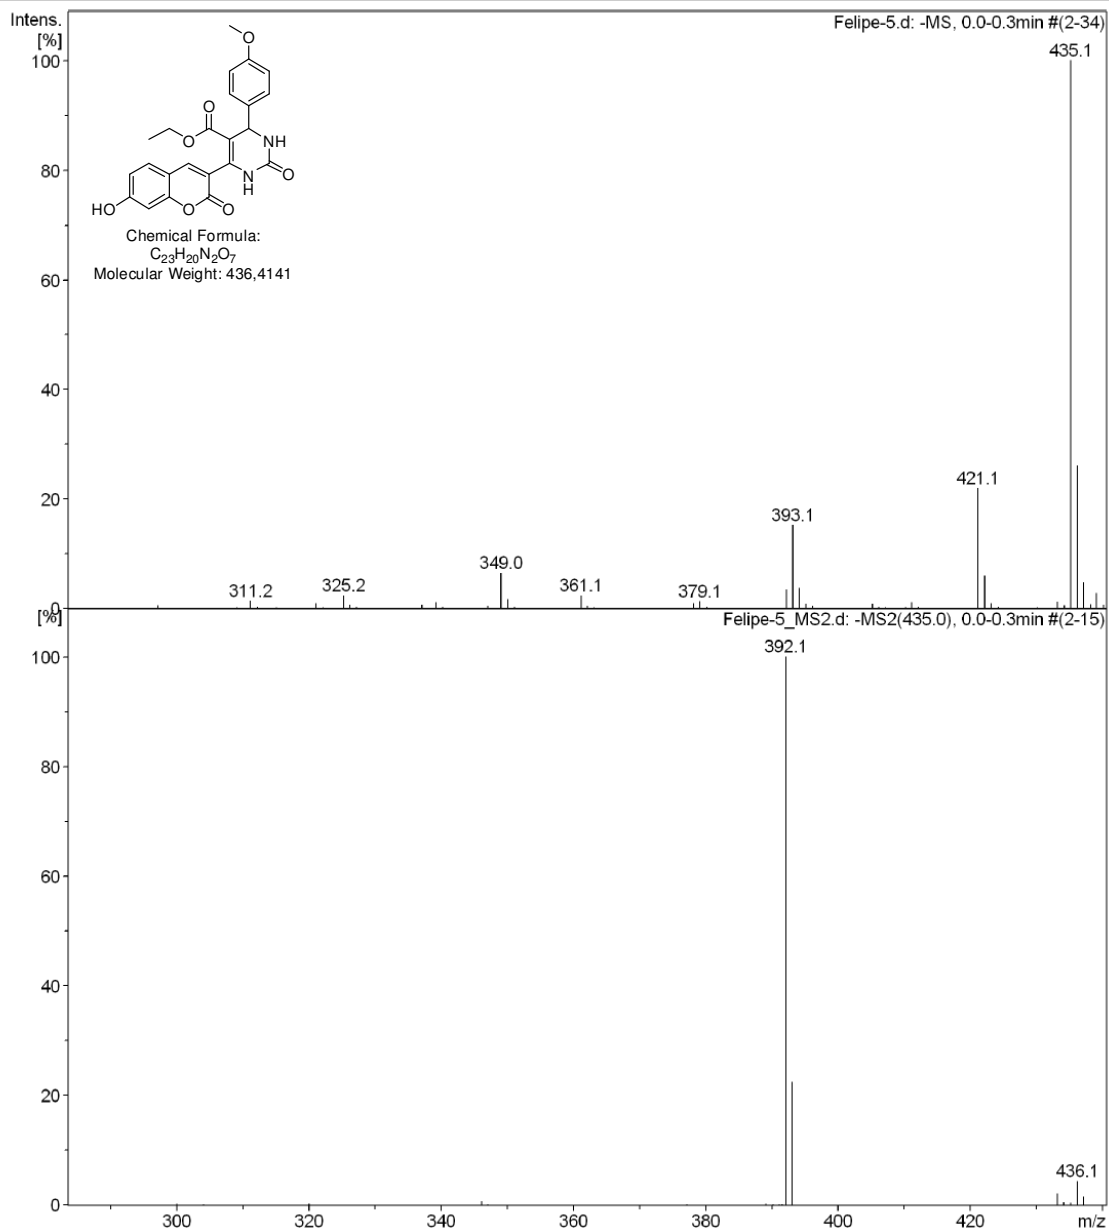Fig. S12 ESI spectra of **4d**.

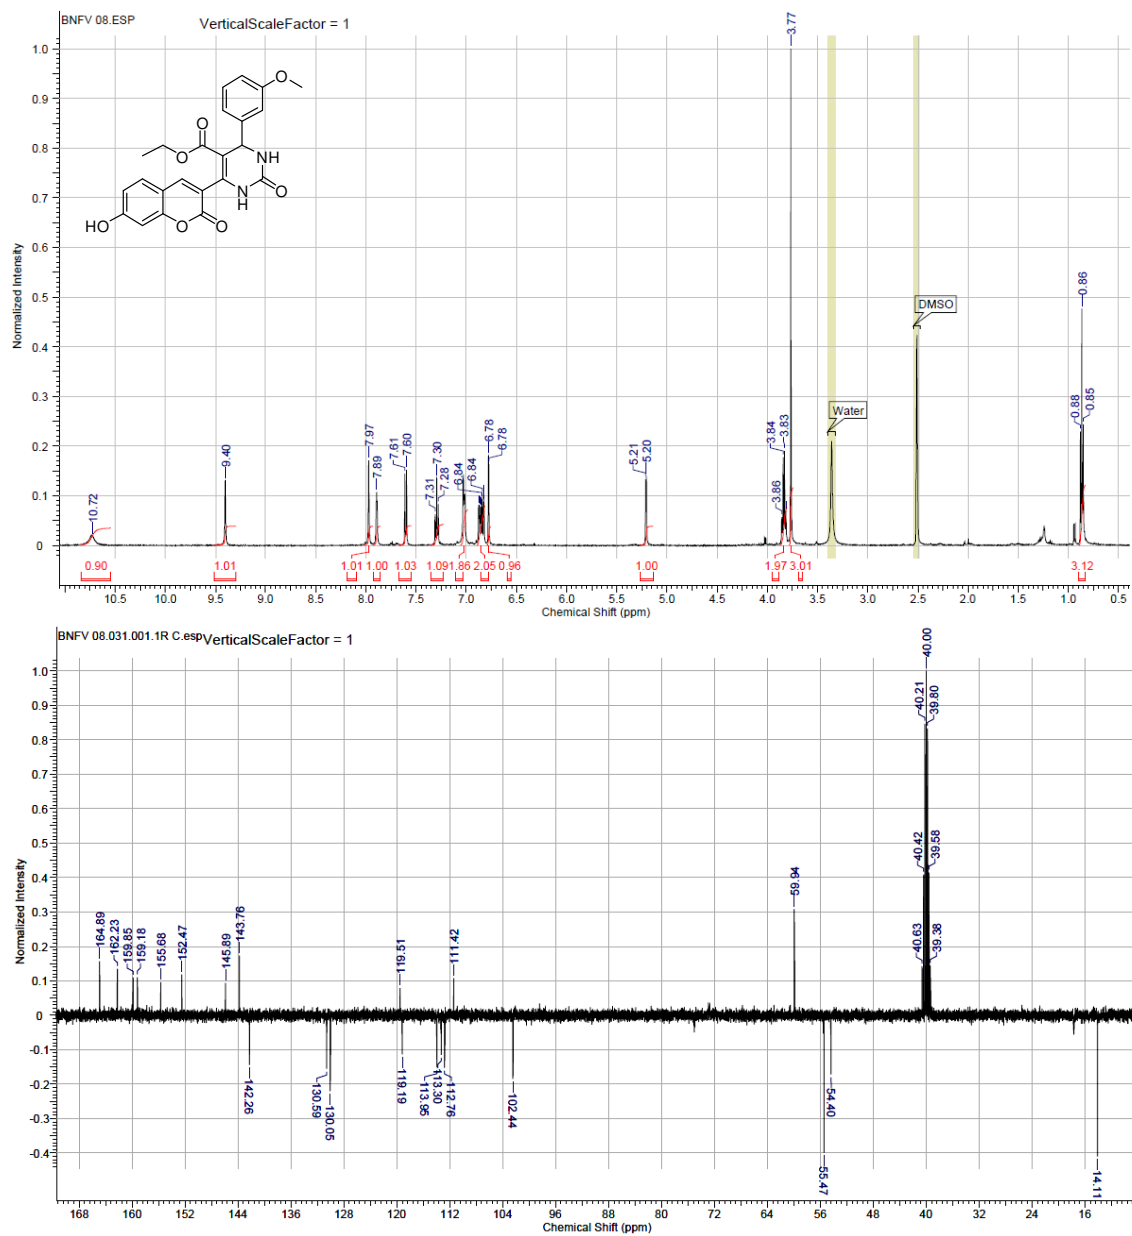

Fig. S13 <sup>1</sup>H NMR (500 MHz), <sup>13</sup>C NMR (100 MHz) spectra of **4e** in DMSO-*d*<sub>6</sub>.

**Acquisition Parameter**

|                   |             |              |           |                          |         |
|-------------------|-------------|--------------|-----------|--------------------------|---------|
| Ion Source Type   | ESI         | Ion Polarity | Negative  | Alternating Ion Polarity | off     |
| Mass Range Mode   | Enhanced    | Scan Begin   | 100 m/z   | Scan End                 | 700 m/z |
| Capillary Exit    | Resolution  | n/a          | n/a       | Trap Drive               | 68.9    |
| Accumulation Time | 110 $\mu$ s | Averages     | 5 Spectra | Auto MS/MS               | off     |

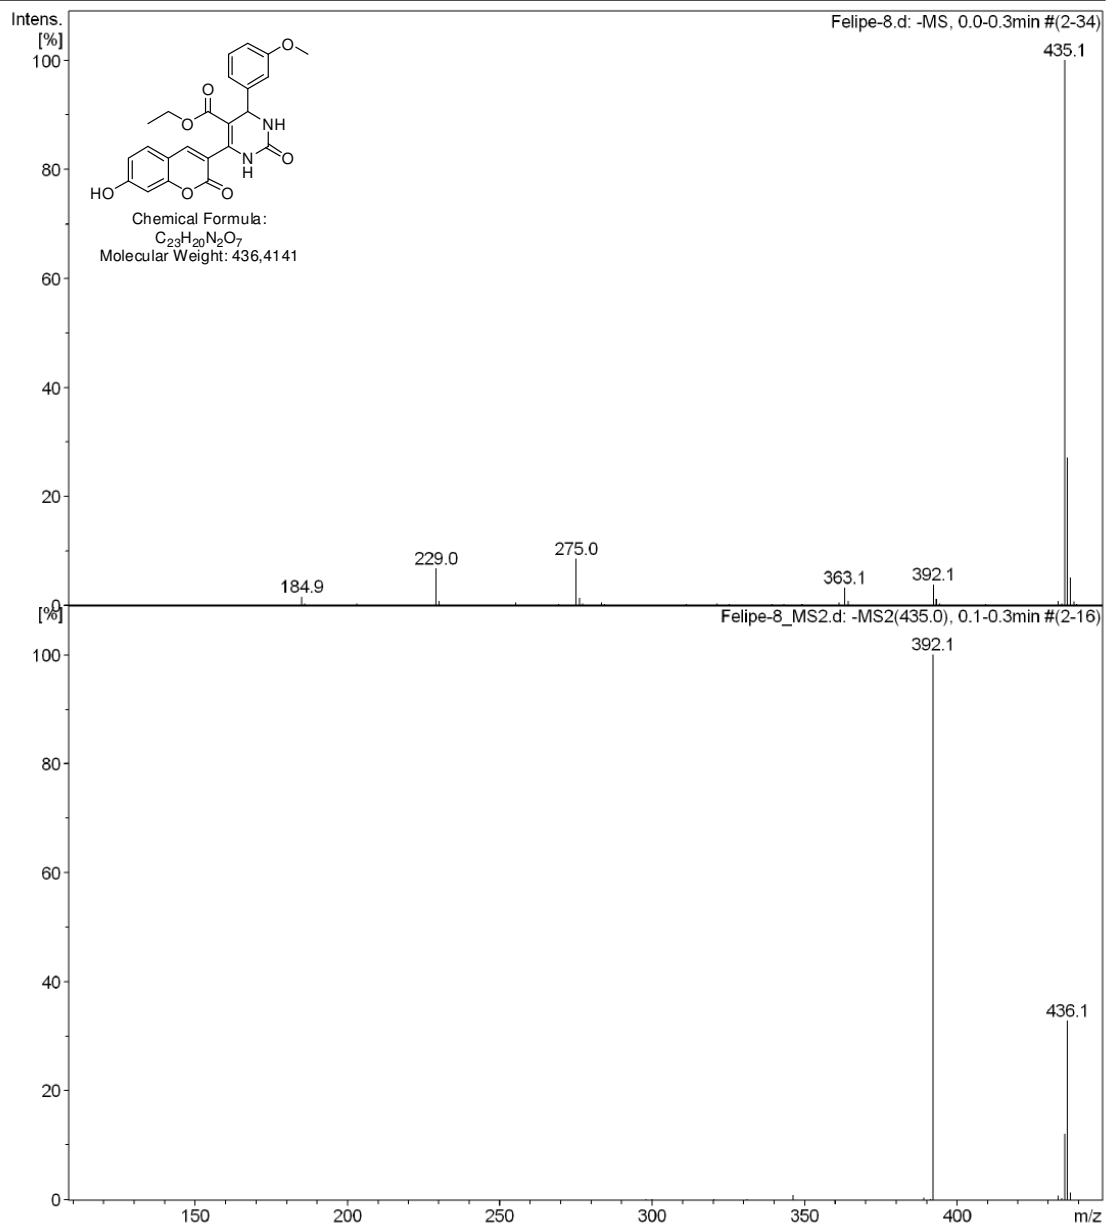Fig. S14 ESI spectra of **4e**.

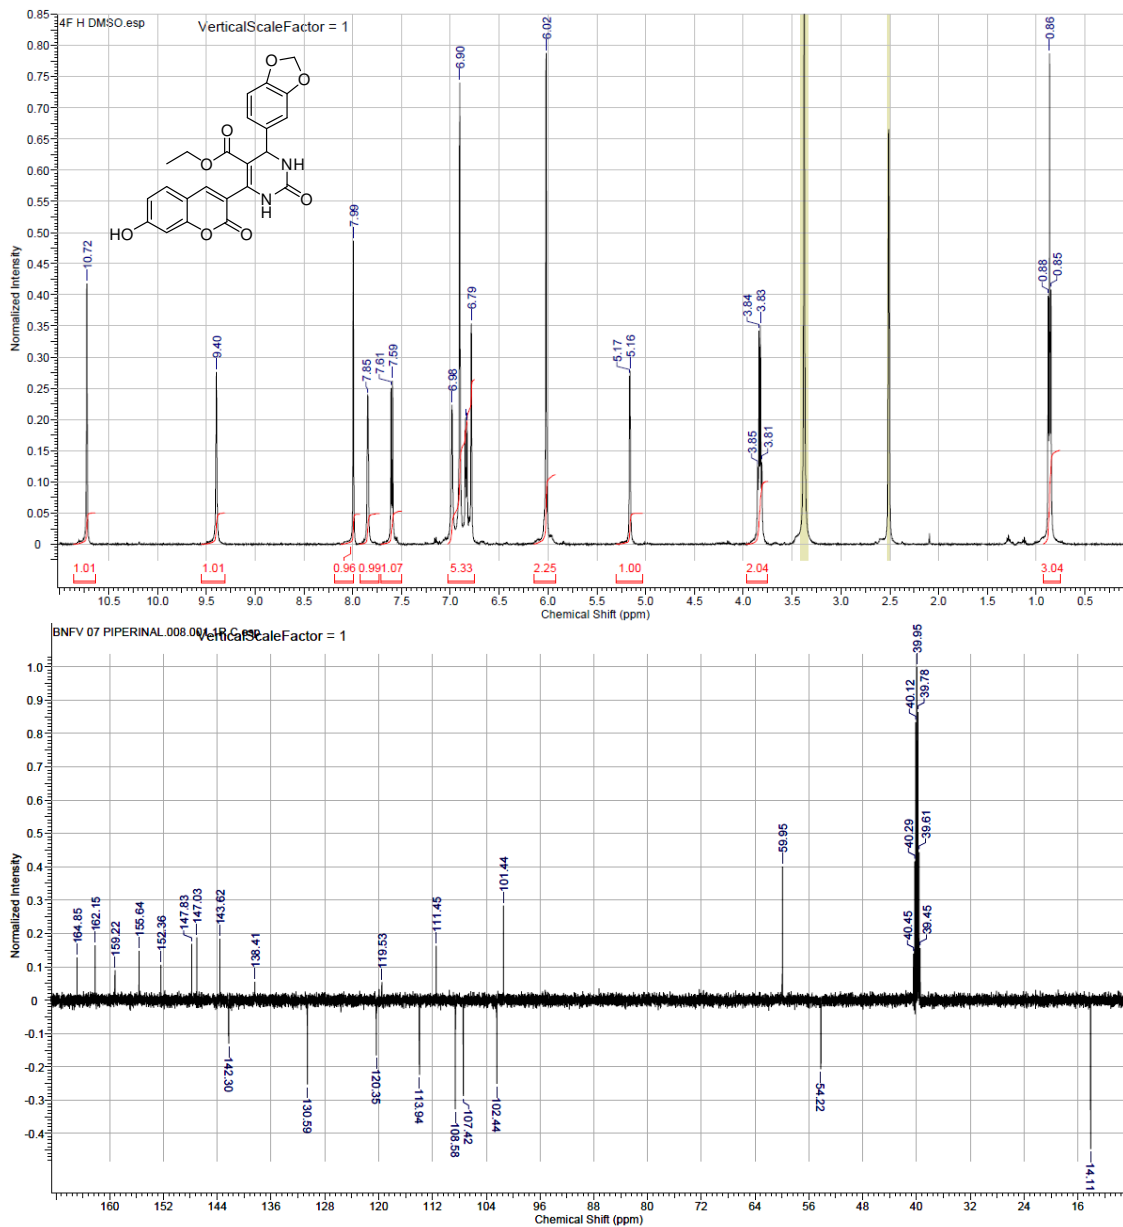

Fig. S15  $^1\text{H}$  NMR (500 MHz),  $^{13}\text{C}$  NMR (125 MHz) spectra of **4f** in DMSO- $d_6$ .



**Acquisition Parameter**

|                   |             |              |           |                          |         |
|-------------------|-------------|--------------|-----------|--------------------------|---------|
| Ion Source Type   | ESI         | Ion Polarity | Negative  | Alternating Ion Polarity | off     |
| Mass Range Mode   | Enhanced    | Scan Begin   | 100 m/z   | Scan End                 | 700 m/z |
| Capillary Exit    | Resolution  | n/a          | n/a       | Trap Drive               | 68.9    |
| Accumulation Time | 187 $\mu$ s | Averages     | 5 Spectra | Auto MS/MS               | off     |

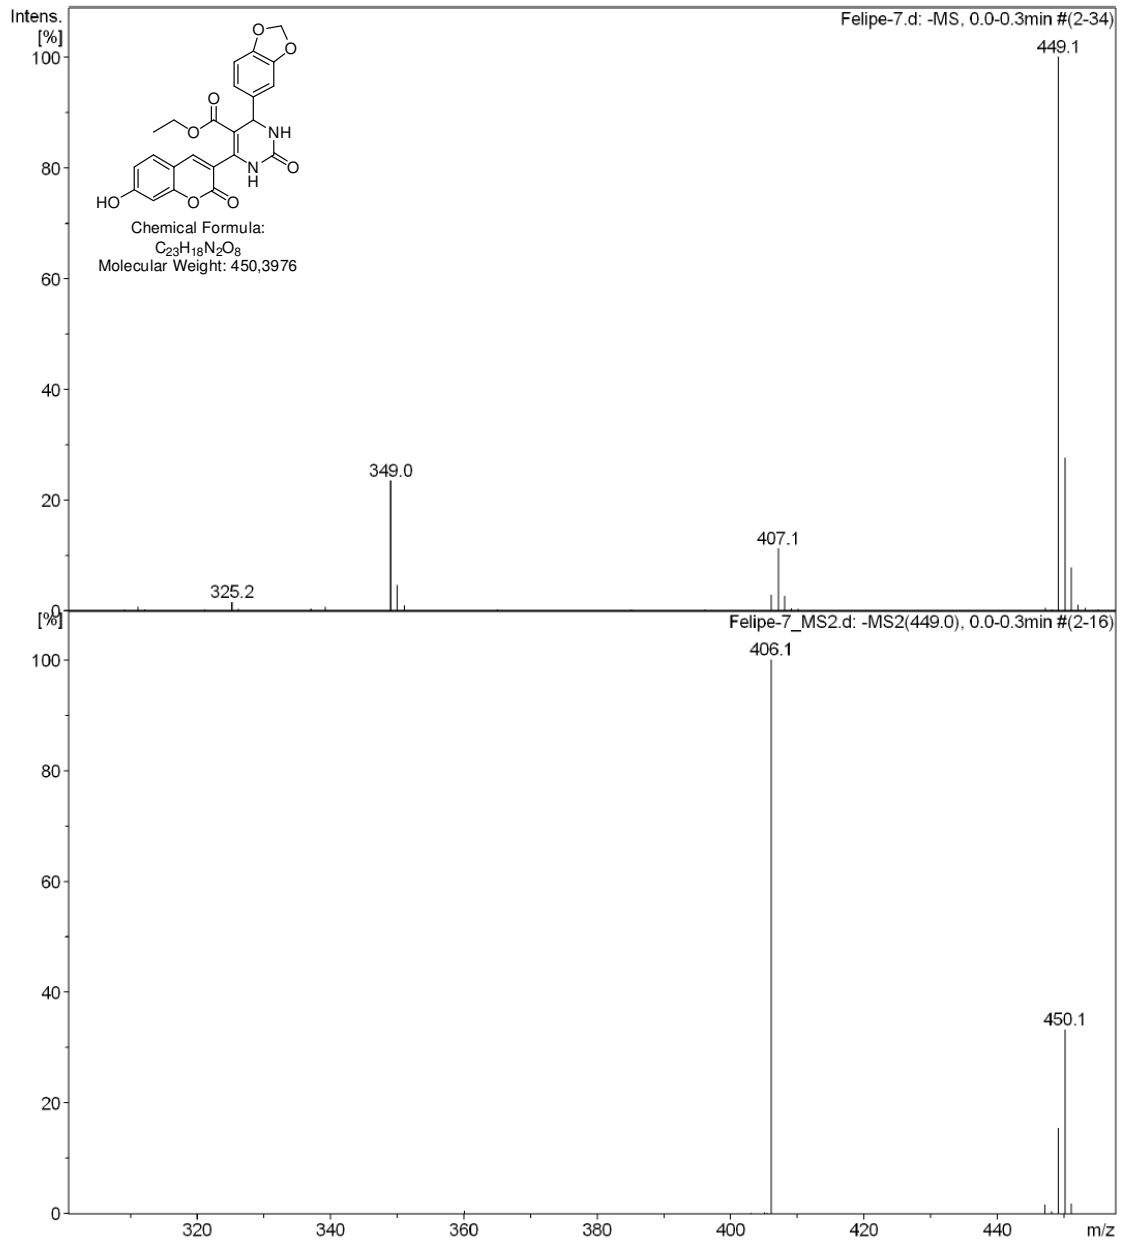Fig. S16 ESI spectra of **4f**.

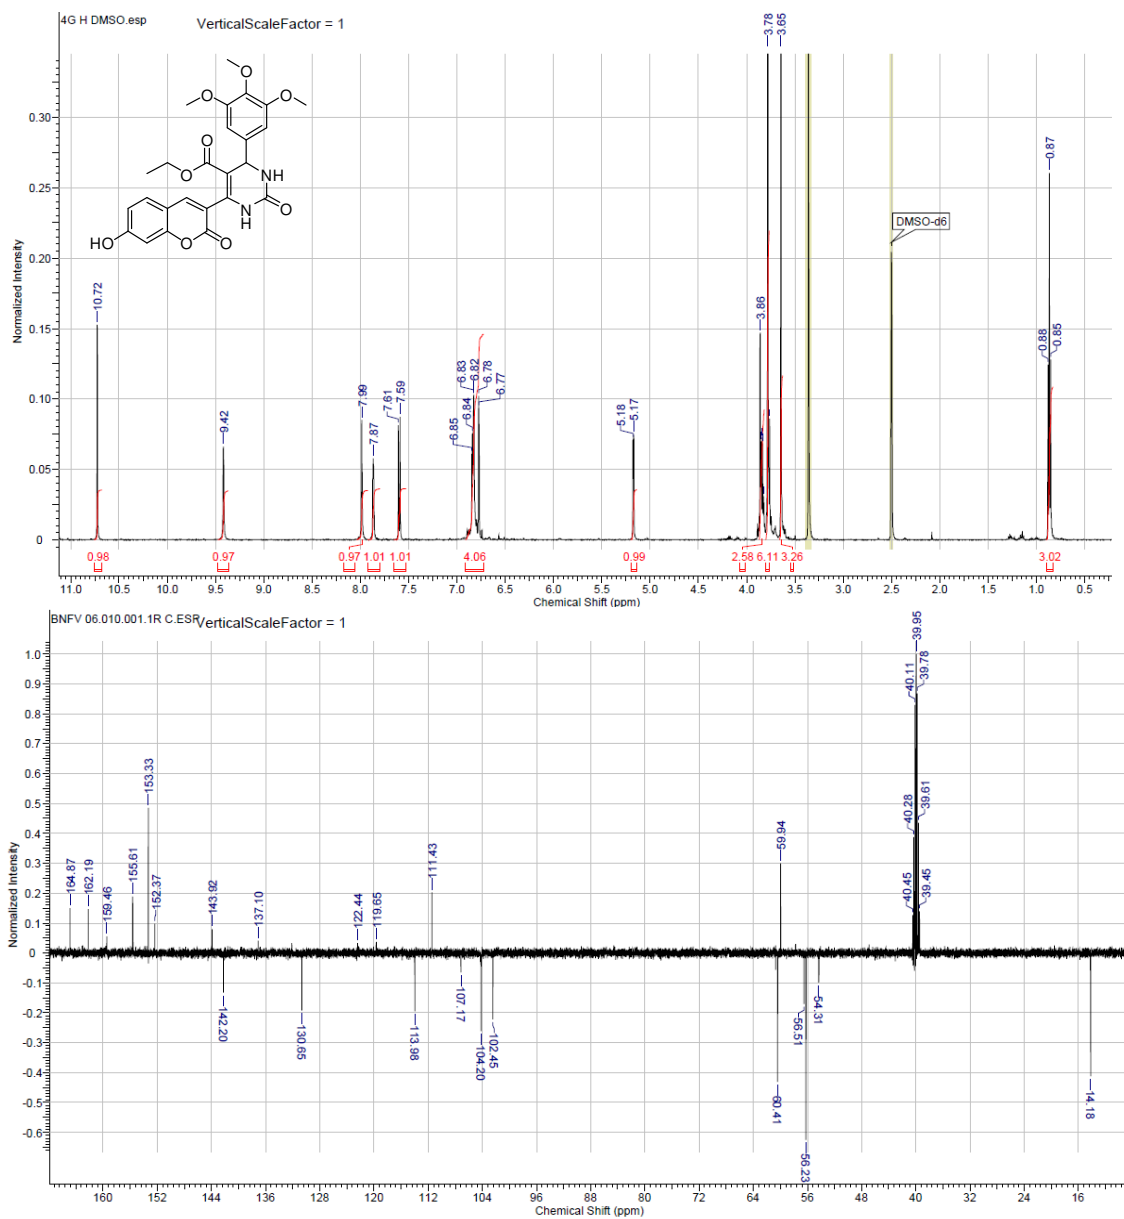

Fig. S17  $^1\text{H}$  NMR (500 MHz),  $^{13}\text{C}$  NMR (125 MHz) spectra of **4g** in  $\text{DMSO-}d_6$ .

**Acquisition Parameter**

|                   |              |              |           |                          |         |
|-------------------|--------------|--------------|-----------|--------------------------|---------|
| Ion Source Type   | ESI          | Ion Polarity | Negative  | Alternating Ion Polarity | off     |
| Mass Range Mode   | Enhanced     | Scan Begin   | 100 m/z   | Scan End                 | 700 m/z |
| Capillary Exit    | Resolution   | n/a          | n/a       | Trap Drive               | 68.9    |
| Accumulation Time | 2620 $\mu$ s | Averages     | 5 Spectra | Auto MS/MS               | off     |

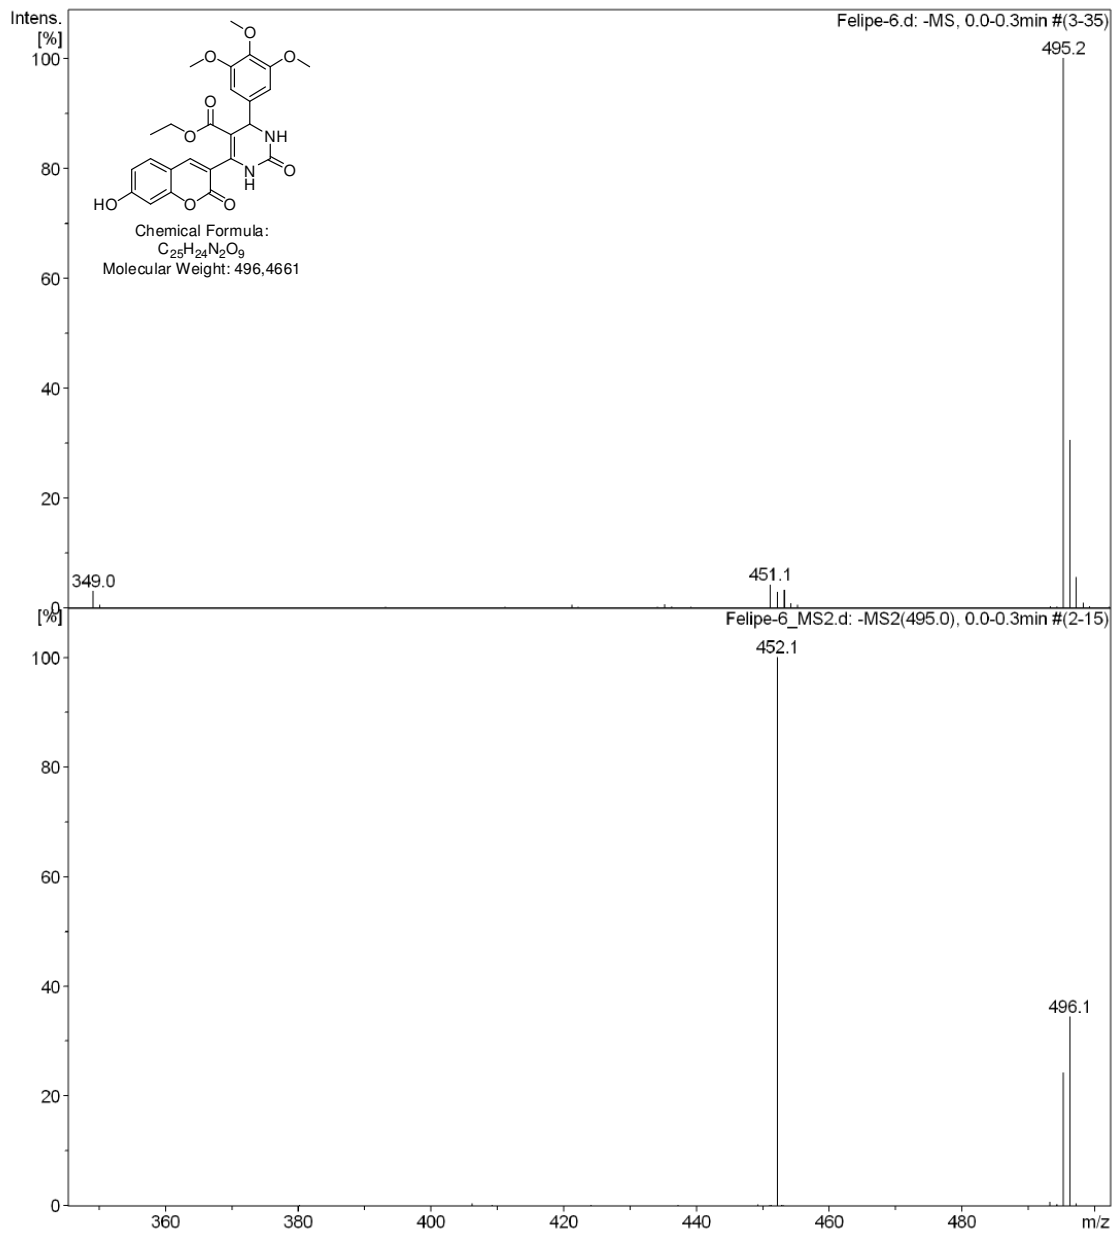Fig. S18 ESI spectra of **4g**.

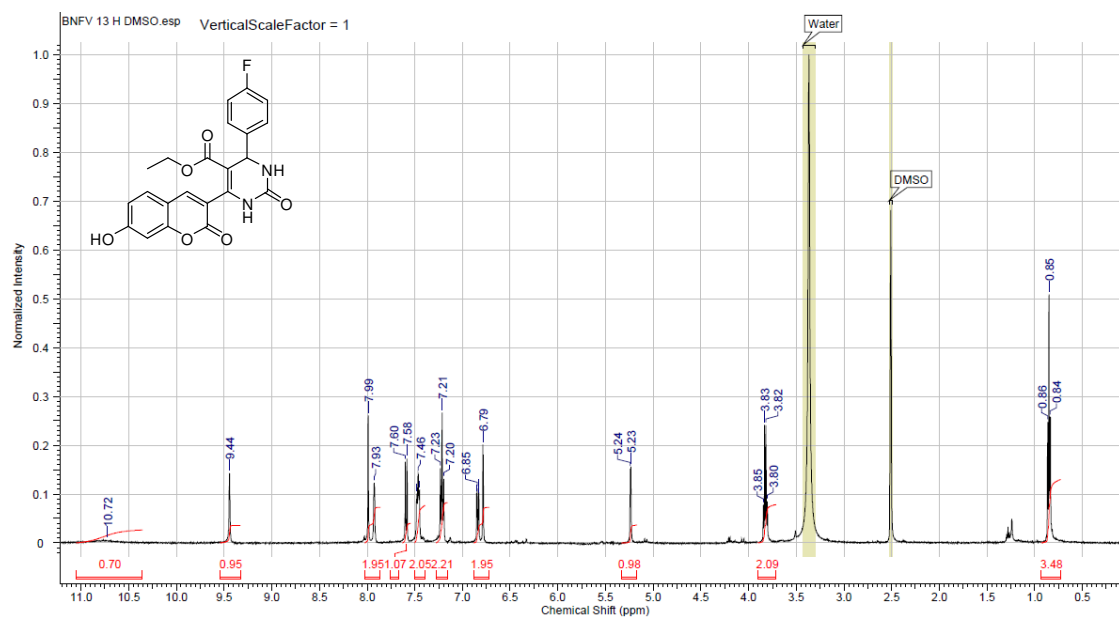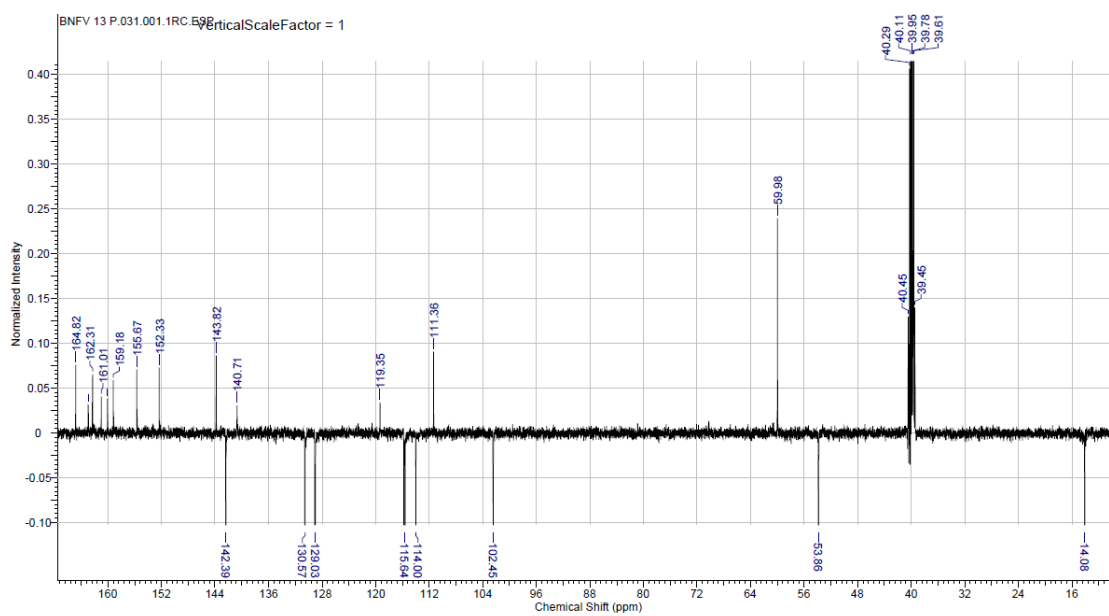

Fig. S19 <sup>1</sup>H NMR (500 MHz), <sup>13</sup>C NMR (125 MHz) spectra of **4h** in DMSO-*d*<sub>6</sub>.

**Acquisition Parameter**

|                   |             |              |           |                          |         |
|-------------------|-------------|--------------|-----------|--------------------------|---------|
| Ion Source Type   | ESI         | Ion Polarity | Negative  | Alternating Ion Polarity | off     |
| Mass Range Mode   | Enhanced    | Scan Begin   | 100 m/z   | Scan End                 | 700 m/z |
| Capillary Exit    | Resolution  | n/a          | n/a       | Trap Drive               | 68.9    |
| Accumulation Time | 169 $\mu$ s | Averages     | 5 Spectra | Auto MS/MS               | off     |

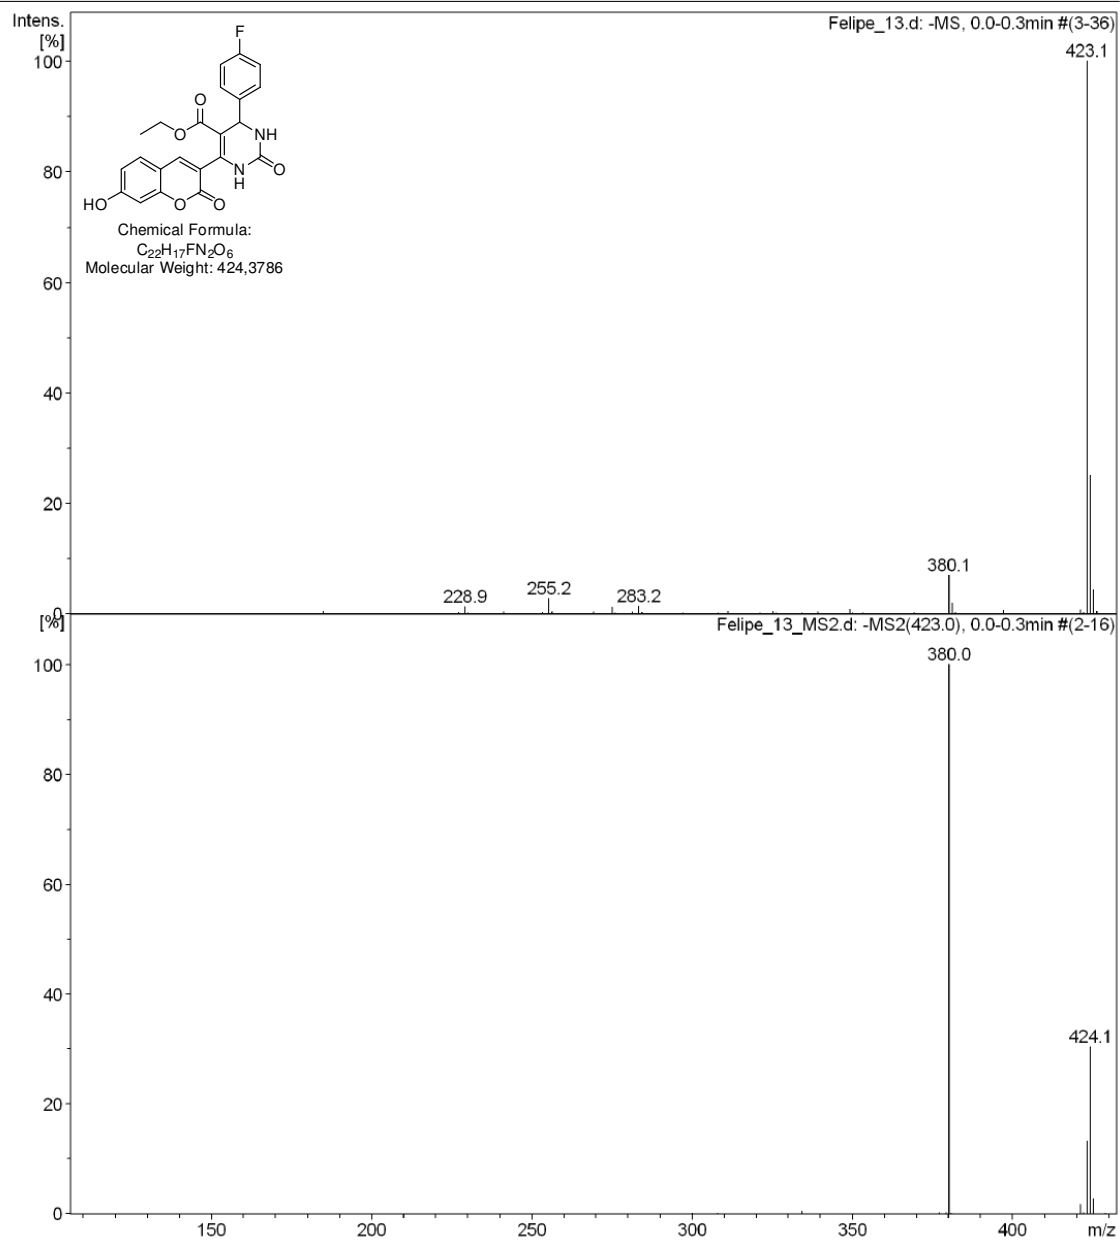

Fig. S20 ESI spectra of **4h**.

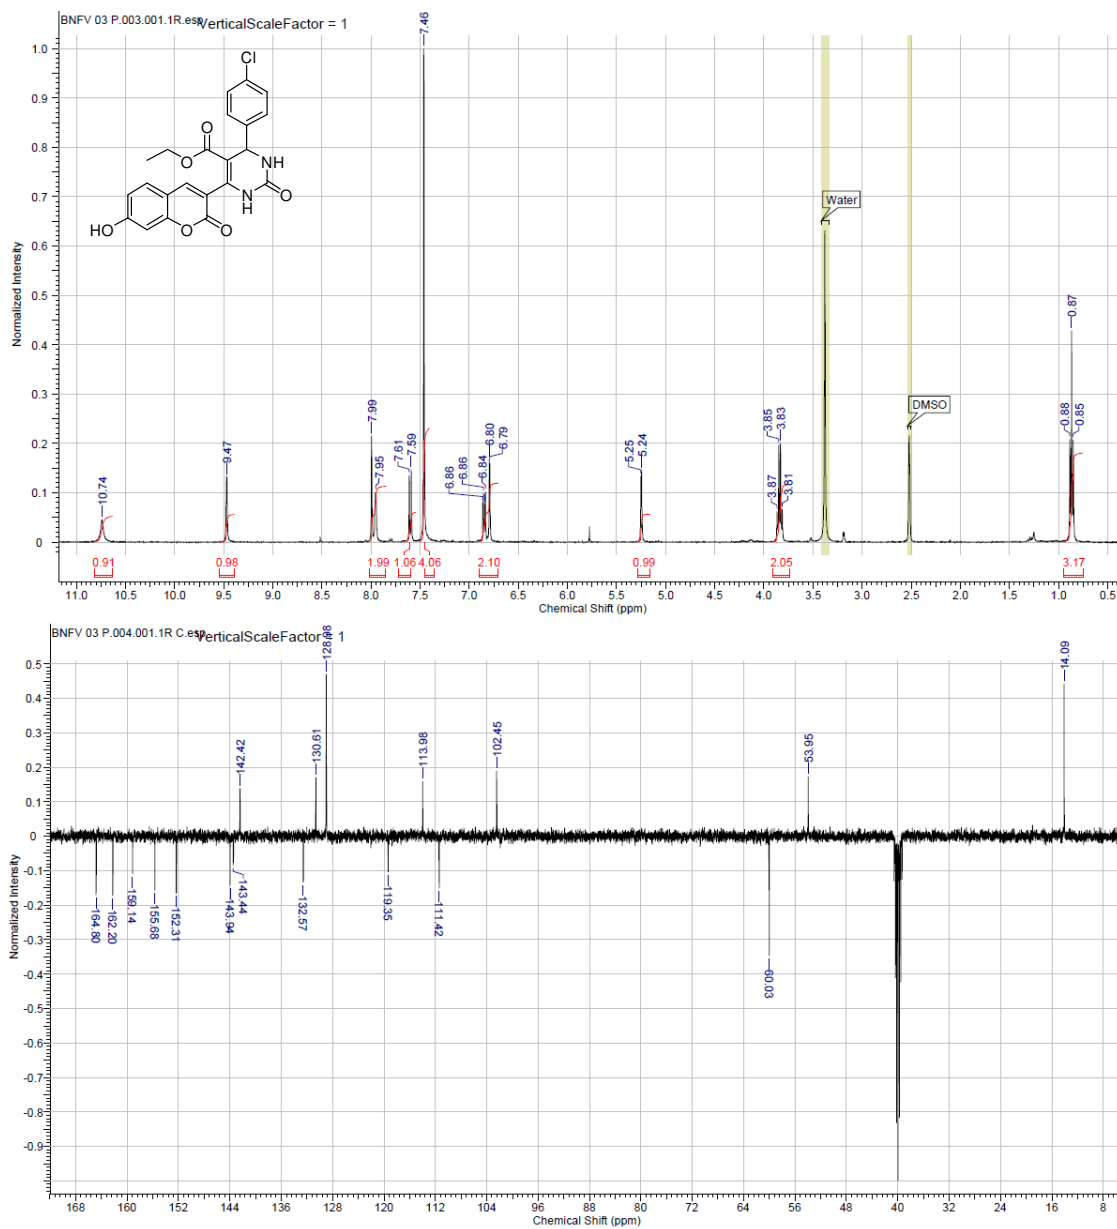

Fig. 21 <sup>1</sup>H NMR (400 MHz), <sup>13</sup>C NMR (100 MHz) spectra of **4i** in DMSO-*d*<sub>6</sub>.

### Acquisition Parameter

|                   |             |              |           |                          |         |
|-------------------|-------------|--------------|-----------|--------------------------|---------|
| Ion Source Type   | ESI         | Ion Polarity | Negative  | Alternating Ion Polarity | off     |
| Mass Range Mode   | Enhanced    | Scan Begin   | 100 m/z   | Scan End                 | 700 m/z |
| Capillary Exit    | Resolution  | n/a          | n/a       | Trap Drive               | 68.9    |
| Accumulation Time | 527 $\mu$ s | Averages     | 5 Spectra | Auto MS/MS               | off     |

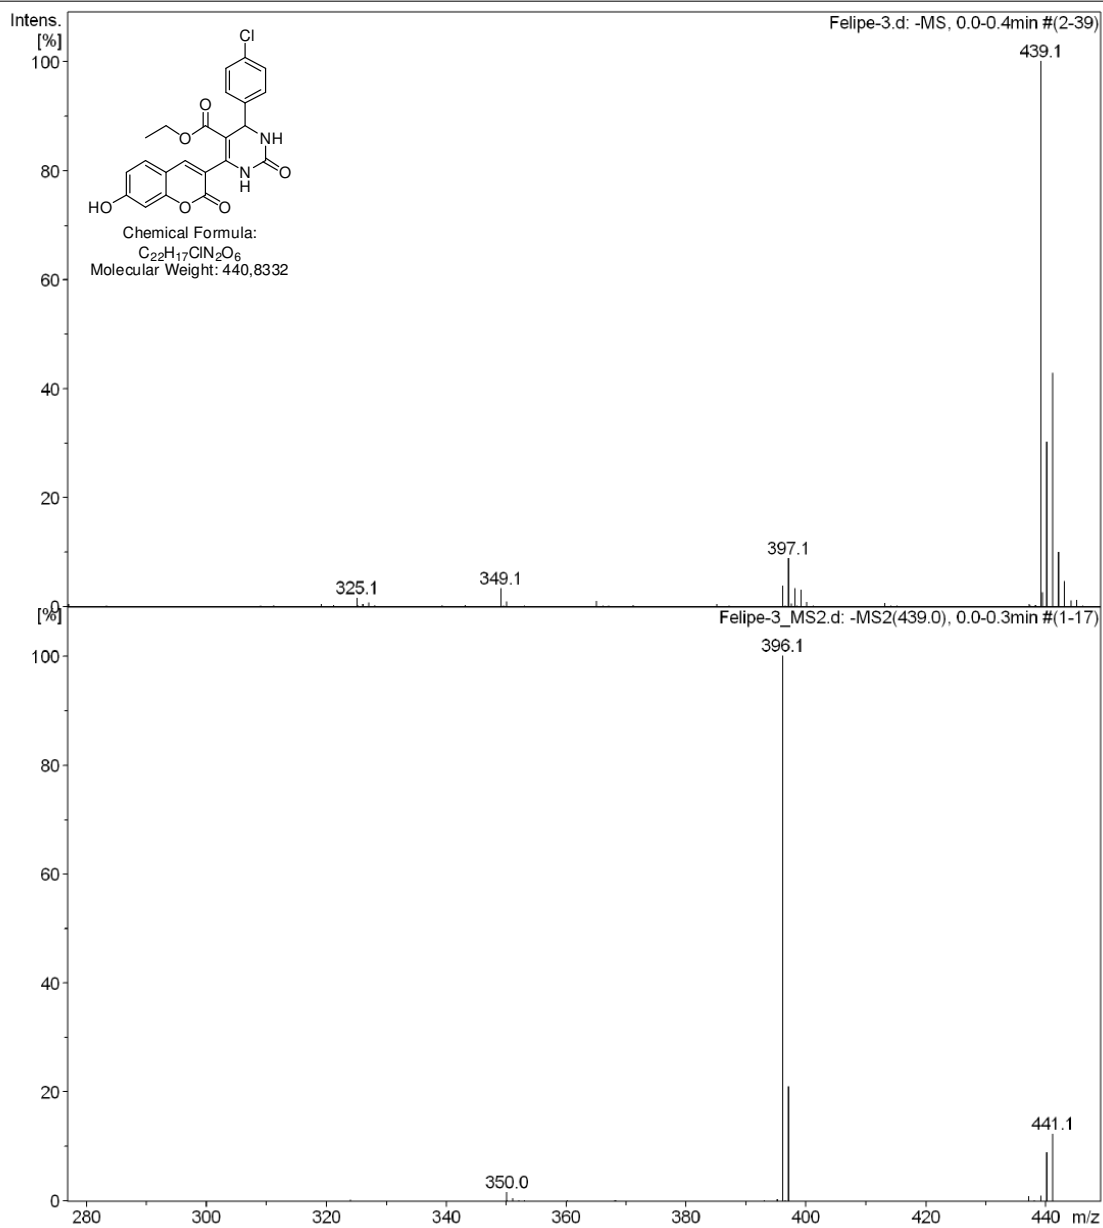

Fig. S22 ESI spectra of **4i**.

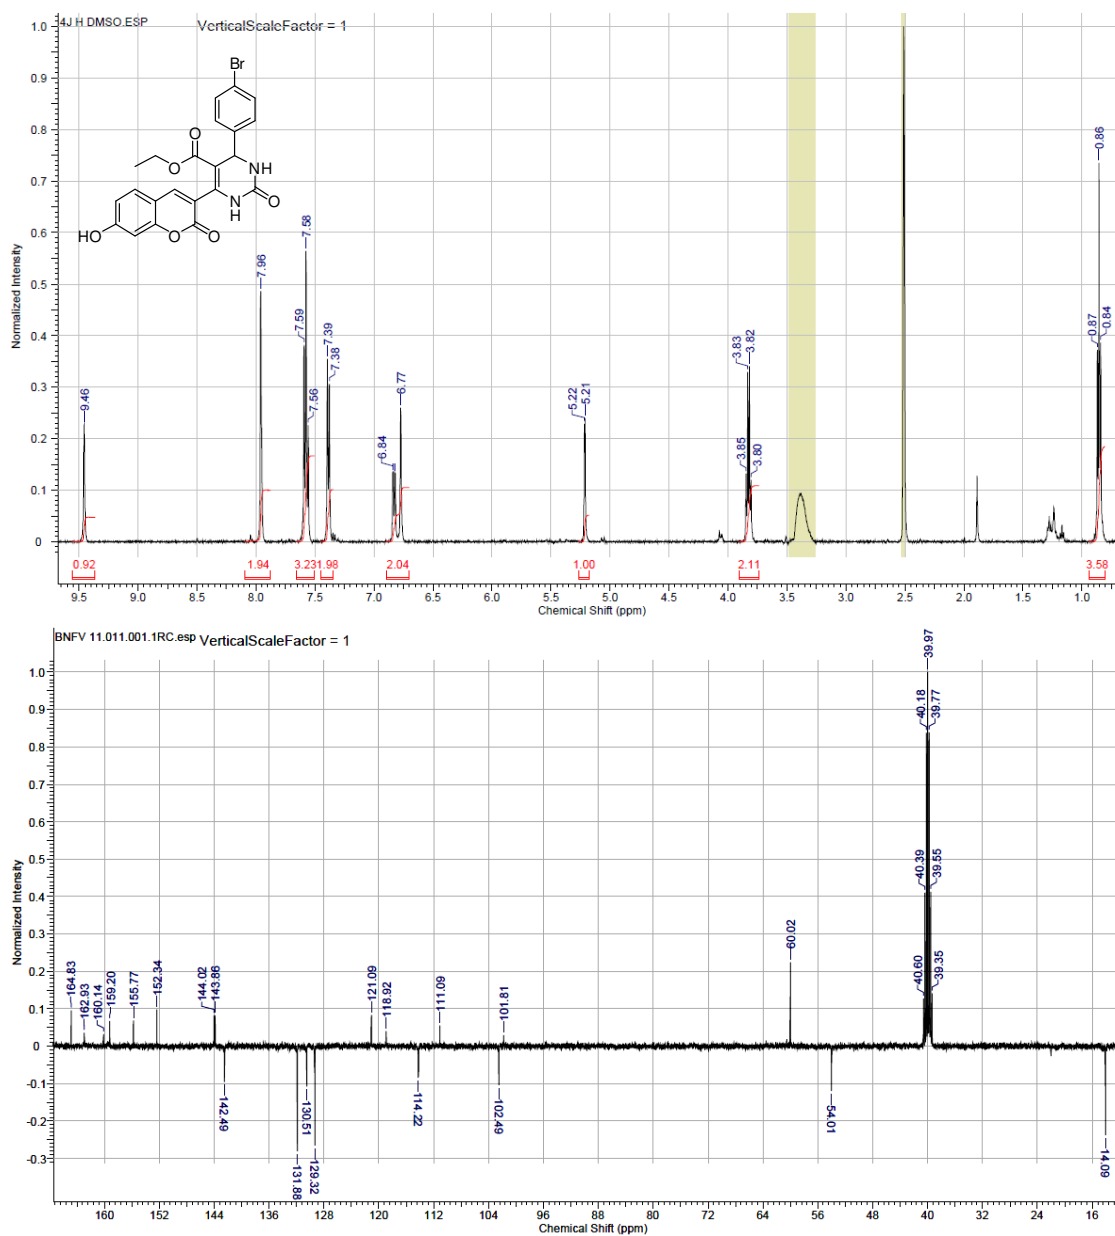

Fig. 23 <sup>1</sup>H NMR (500 MHz), <sup>13</sup>C NMR (100 MHz) spectra of **4j** in DMSO-*d*<sub>6</sub>.



**Acquisition Parameter**

|                   |              |              |           |                          |         |
|-------------------|--------------|--------------|-----------|--------------------------|---------|
| Ion Source Type   | ESI          | Ion Polarity | Negative  | Alternating Ion Polarity | off     |
| Mass Range Mode   | Enhanced     | Scan Begin   | 100 m/z   | Scan End                 | 700 m/z |
| Capillary Exit    | Resolution   | n/a          | n/a       | Trap Drive               | 68.9    |
| Accumulation Time | 3267 $\mu$ s | Averages     | 5 Spectra | Auto MS/MS               | off     |

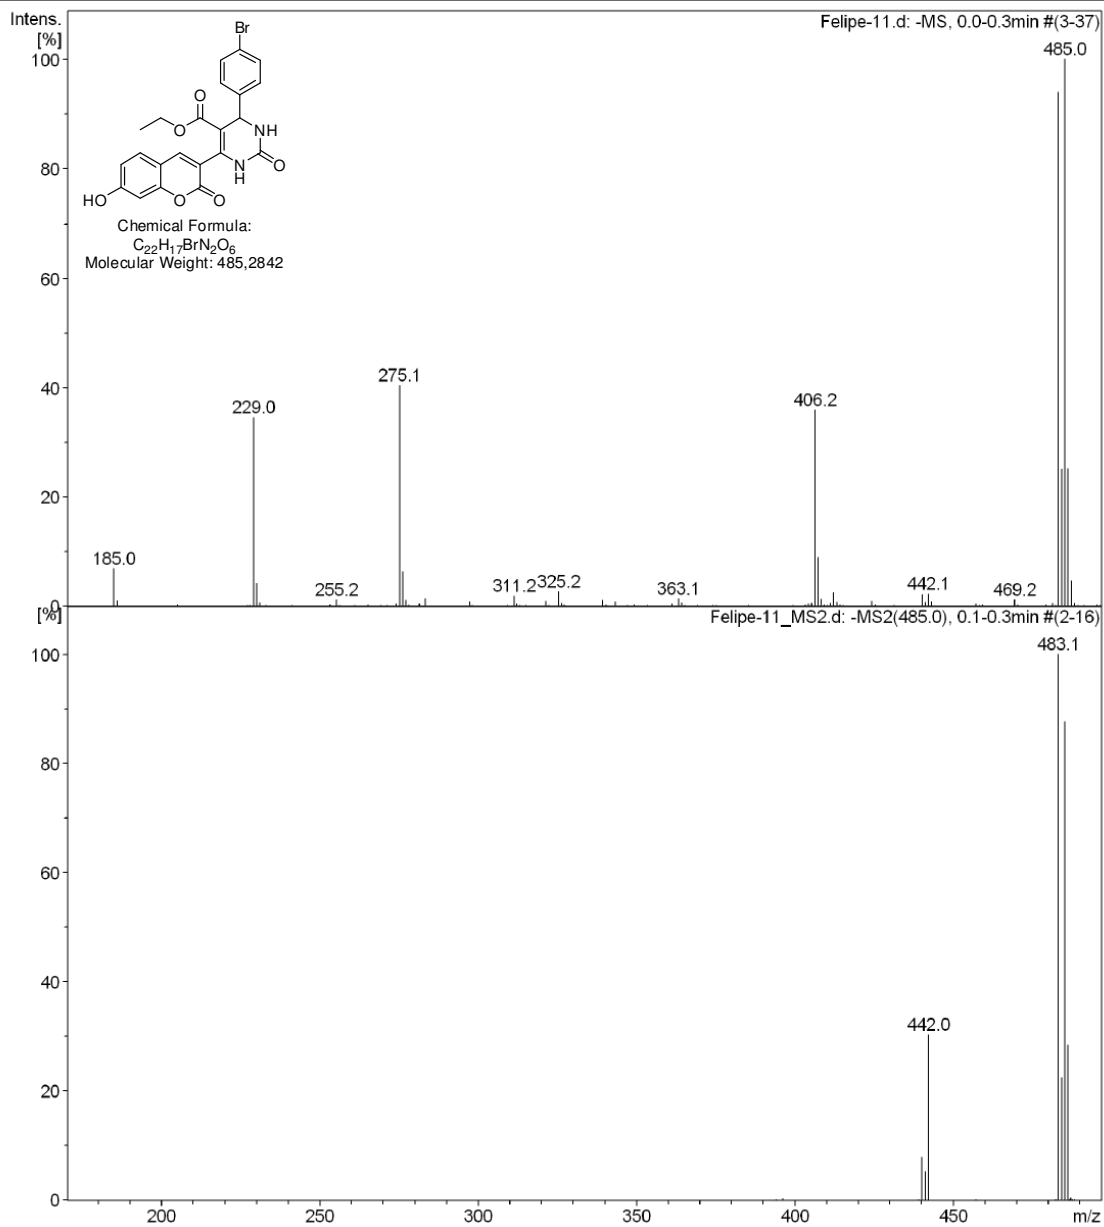Fig. S24 ESI spectra of **4j**.

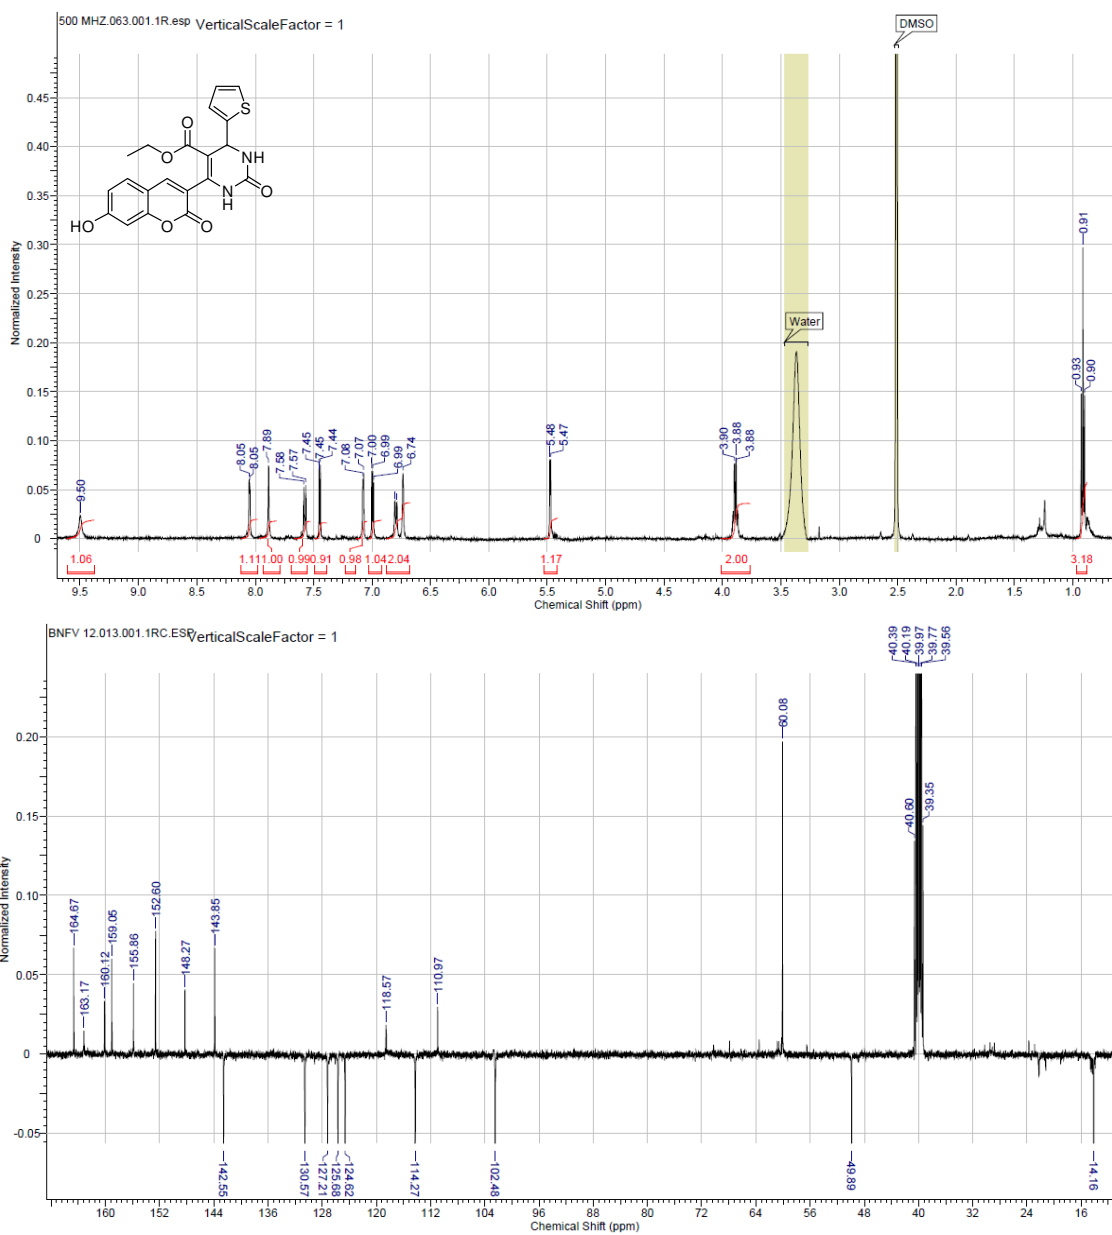

Fig. 25  $^1\text{H}$  NMR (500 MHz),  $^{13}\text{C}$  NMR (100 MHz) spectra of **4k** in  $\text{DMSO-}d_6$ .

**Acquisition Parameter**

|                   |             |              |           |                          |         |
|-------------------|-------------|--------------|-----------|--------------------------|---------|
| Ion Source Type   | ESI         | Ion Polarity | Negative  | Alternating Ion Polarity | off     |
| Mass Range Mode   | Enhanced    | Scan Begin   | 100 m/z   | Scan End                 | 700 m/z |
| Capillary Exit    | Resolution  | n/a          | n/a       | Trap Drive               | 68.9    |
| Accumulation Time | 918 $\mu$ s | Averages     | 5 Spectra | Auto MS/MS               | off     |

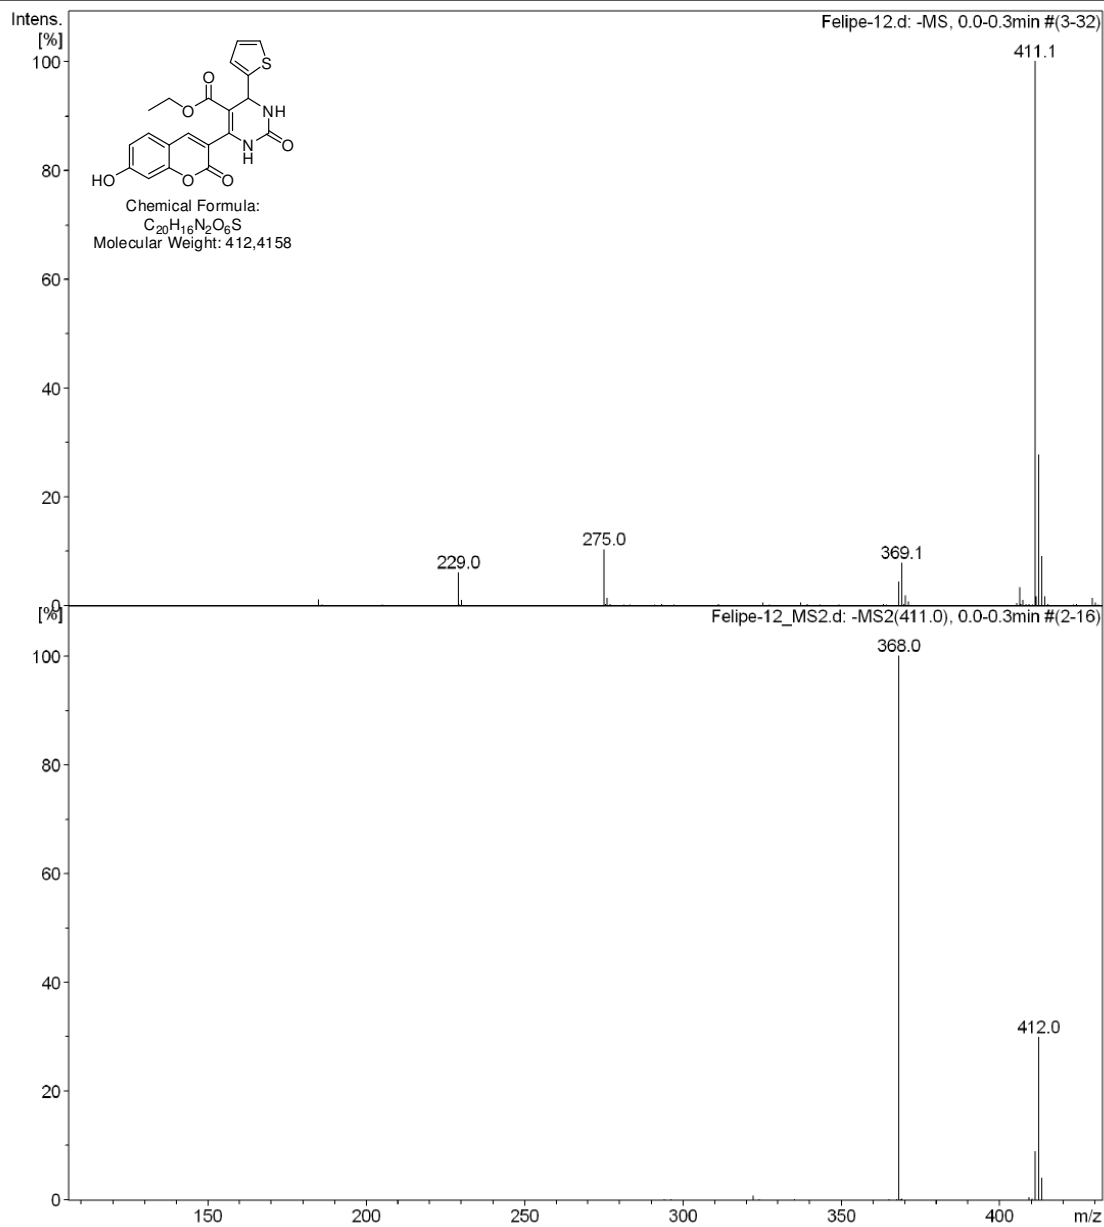Fig. S26 ESI spectra of **4k**.

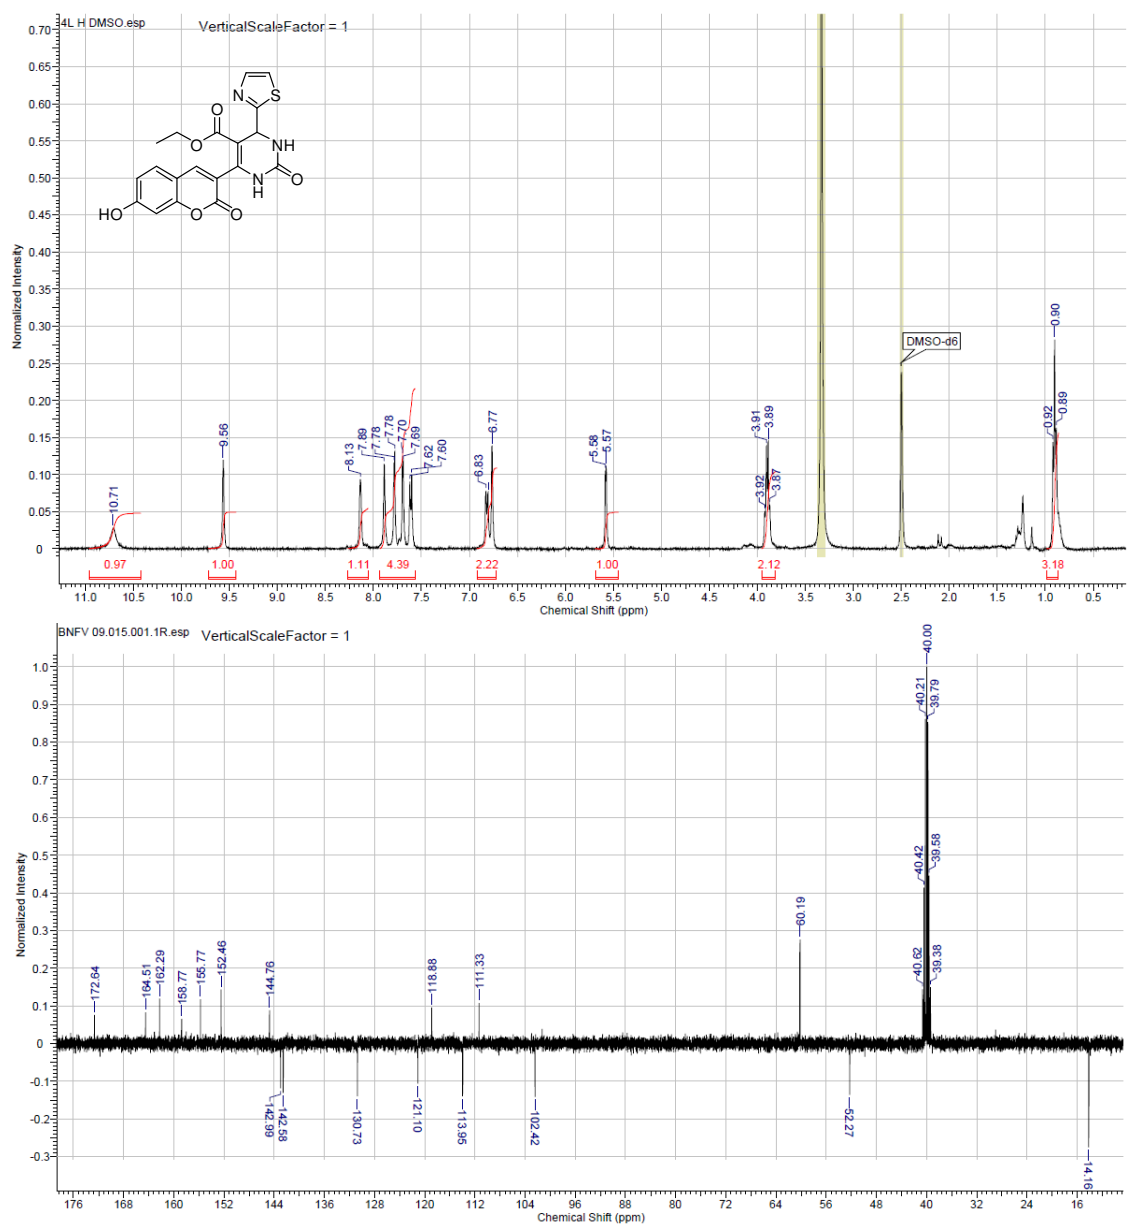

Fig. S27 <sup>1</sup>H NMR (400 MHz), <sup>13</sup>C NMR (100 MHz) spectra of **4I** in DMSO-*d*<sub>6</sub>.

**Acquisition Parameter**

|                   |             |              |           |                          |         |
|-------------------|-------------|--------------|-----------|--------------------------|---------|
| Ion Source Type   | ESI         | Ion Polarity | Negative  | Alternating Ion Polarity | off     |
| Mass Range Mode   | Enhanced    | Scan Begin   | 100 m/z   | Scan End                 | 700 m/z |
| Capillary Exit    | Resolution  | n/a          | n/a       | Trap Drive               | 68.9    |
| Accumulation Time | 199 $\mu$ s | Averages     | 5 Spectra | Auto MS/MS               | off     |

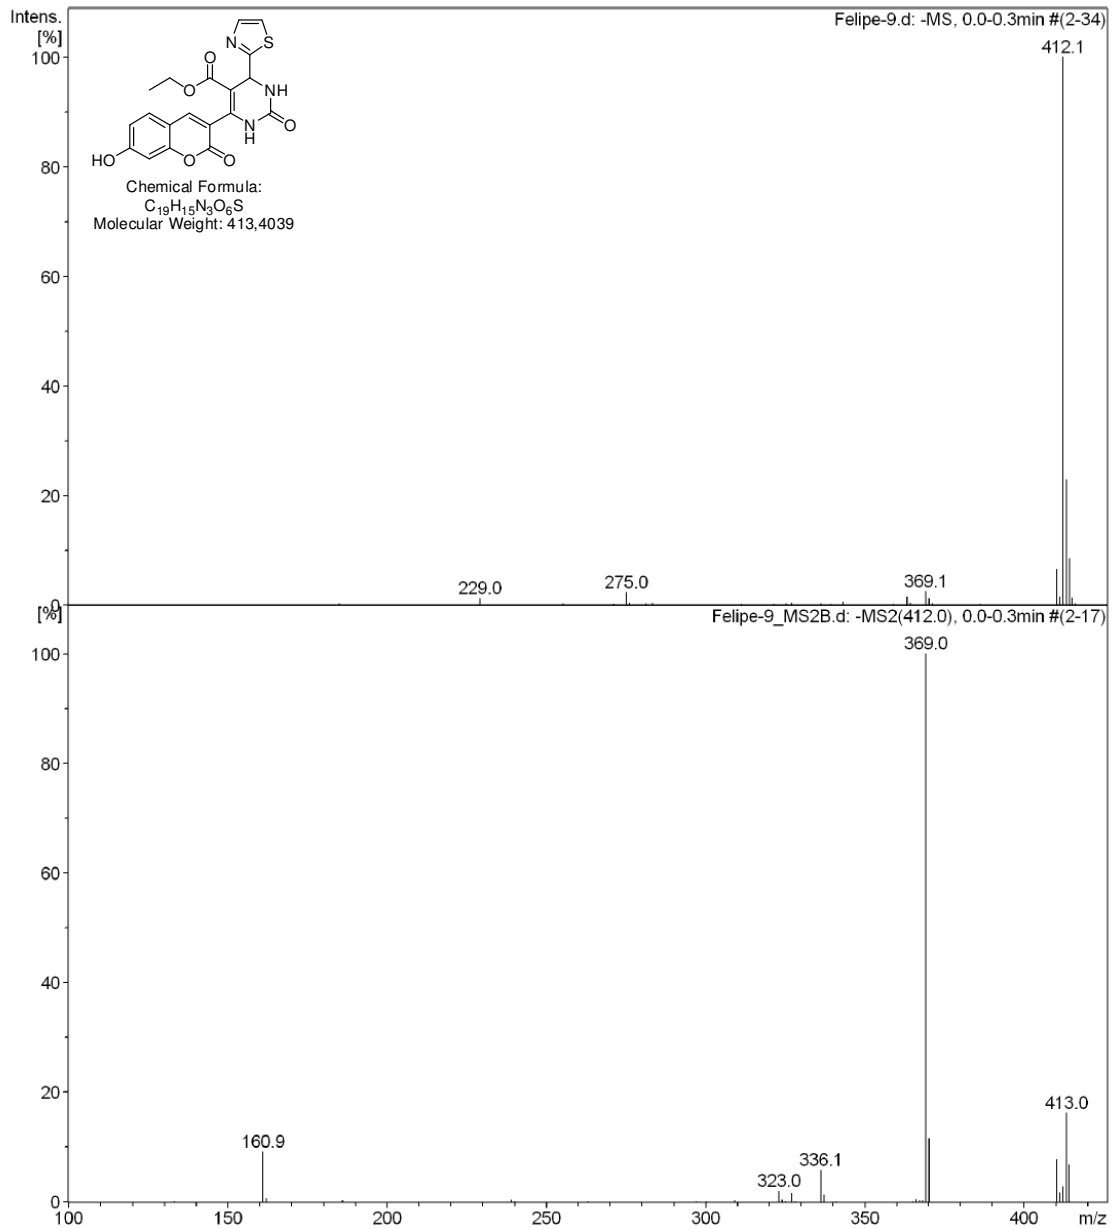

Fig. S28 ESI spectra of **4I**.

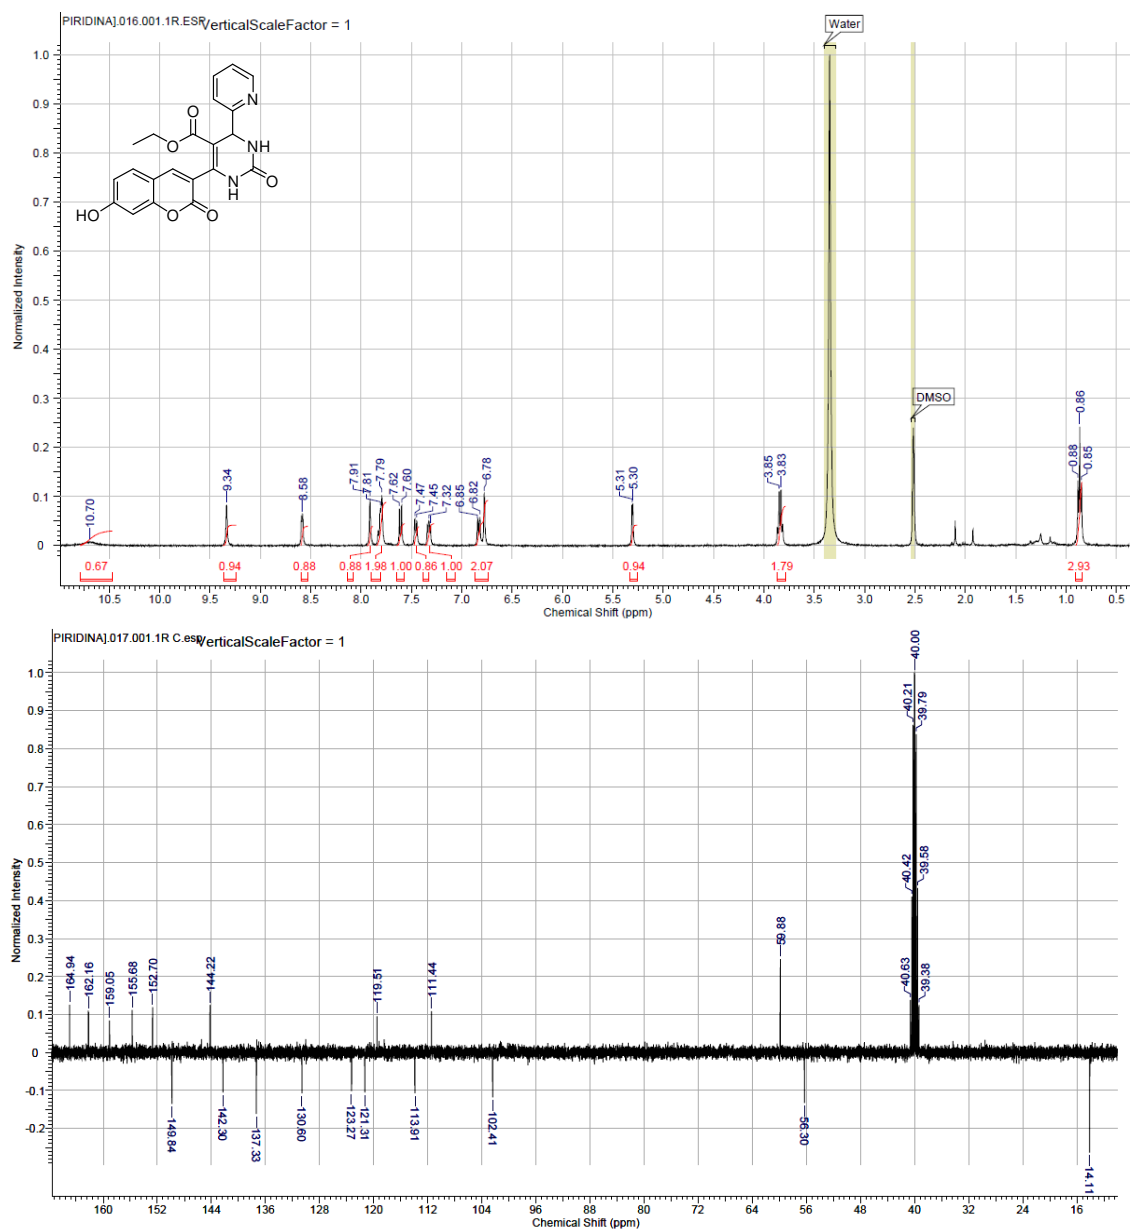

**Acquisition Parameter**

|                   |            |              |           |                          |         |
|-------------------|------------|--------------|-----------|--------------------------|---------|
| Ion Source Type   | ESI        | Ion Polarity | Negative  | Alternating Ion Polarity | off     |
| Mass Range Mode   | Enhanced   | Scan Begin   | 100 m/z   | Scan End                 | 700 m/z |
| Capillary Exit    | Resolution | n/a          | n/a       | Trap Drive               | 68.9    |
| Accumulation Time | 94 $\mu$ s | Averages     | 5 Spectra | Auto MS/MS               | off     |

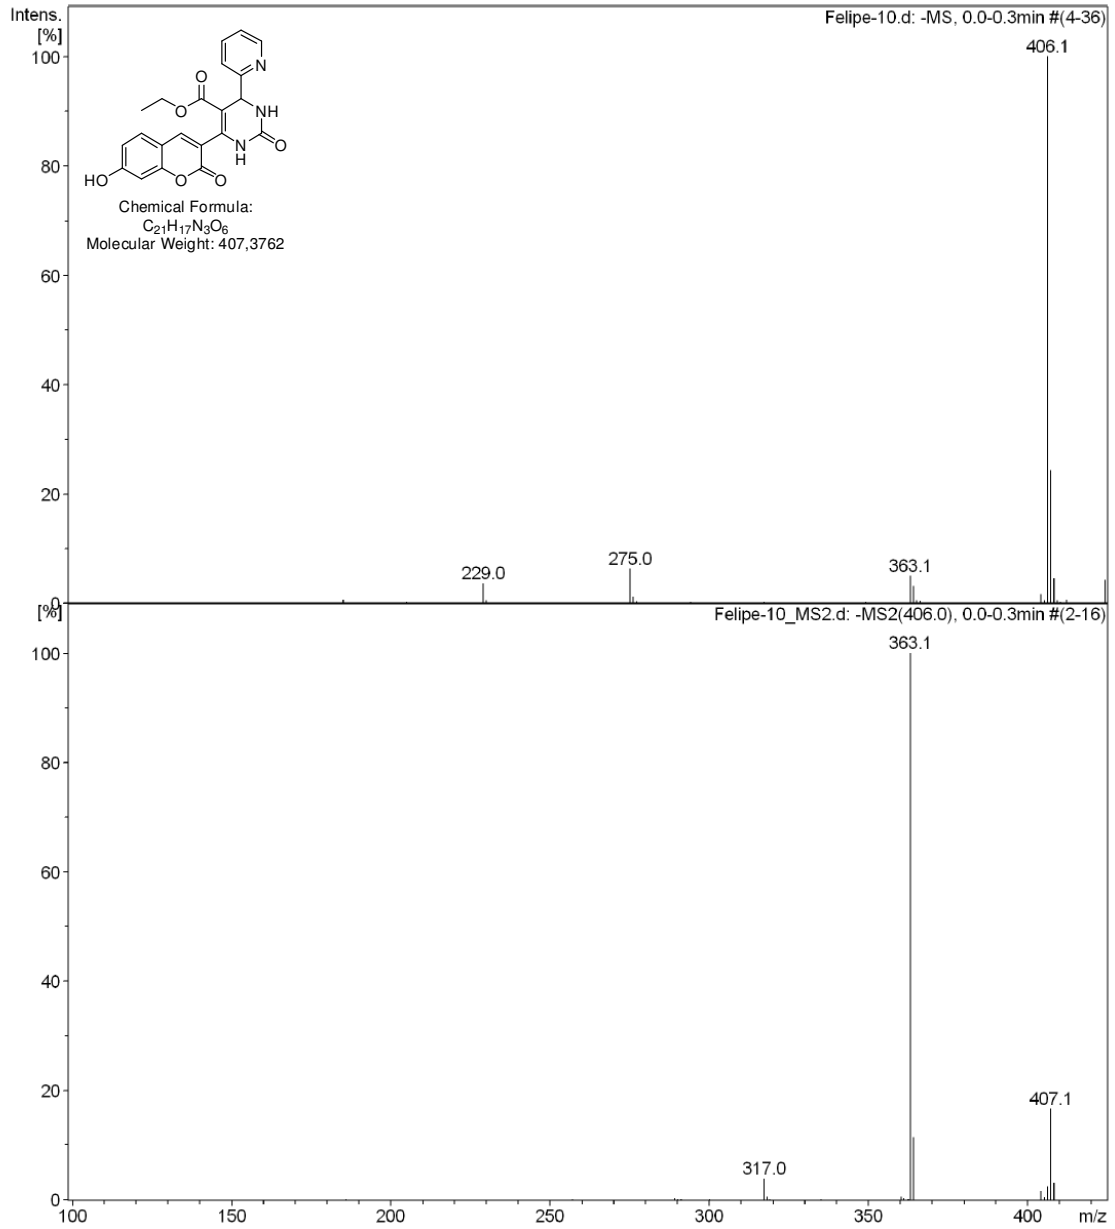

Fig. S30 ESI spectra of **4m**.

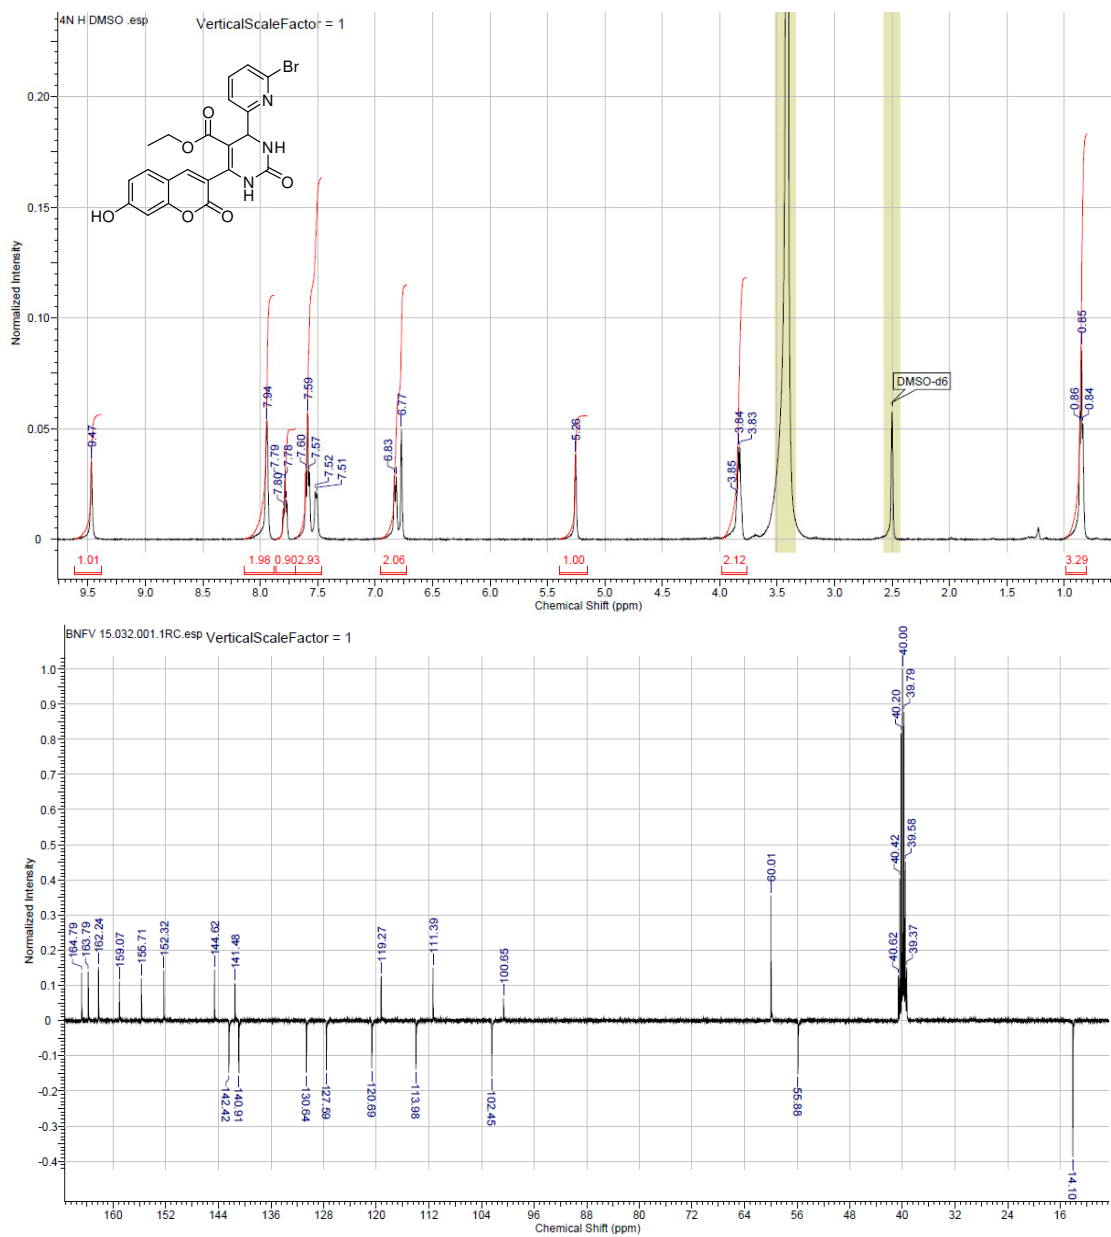

Fig. S31  $^1\text{H}$  NMR (500 MHz),  $^{13}\text{C}$  NMR (125 MHz) spectra of **4n** in  $\text{DMSO-}d_6$ .



**Acquisition Parameter**

|                   |              |              |           |                          |         |
|-------------------|--------------|--------------|-----------|--------------------------|---------|
| Ion Source Type   | ESI          | Ion Polarity | Negative  | Alternating Ion Polarity | off     |
| Mass Range Mode   | Enhanced     | Scan Begin   | 100 m/z   | Scan End                 | 700 m/z |
| Capillary Exit    | Resolution   | n/a          | n/a       | Trap Drive               | 68.9    |
| Accumulation Time | 2189 $\mu$ s | Averages     | 5 Spectra | Auto MS/MS               | off     |

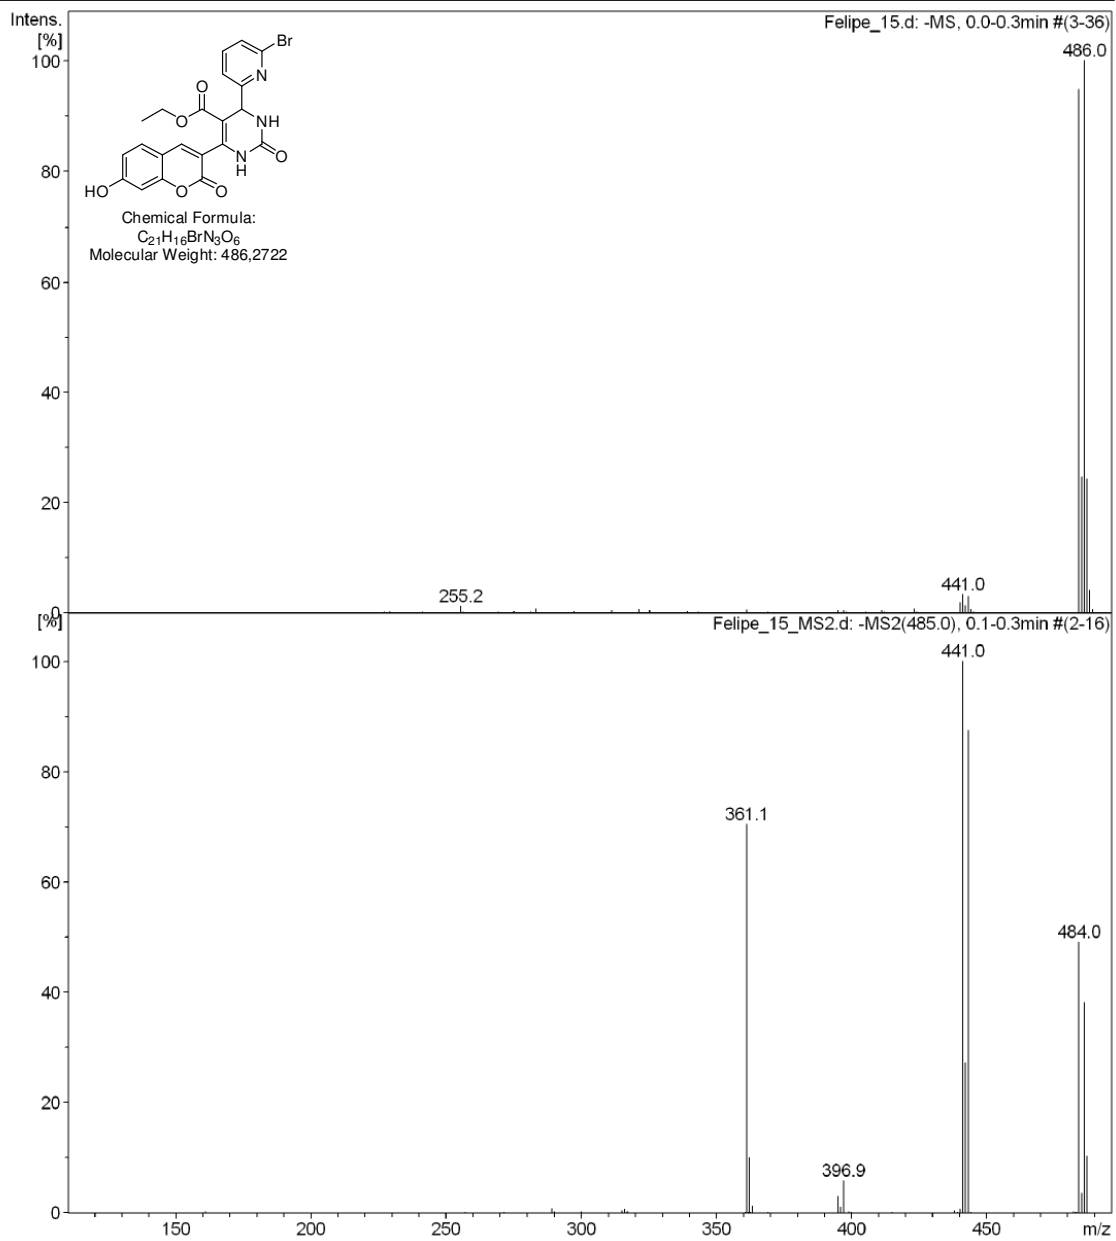Fig. S32 ESI spectra of **4n**.

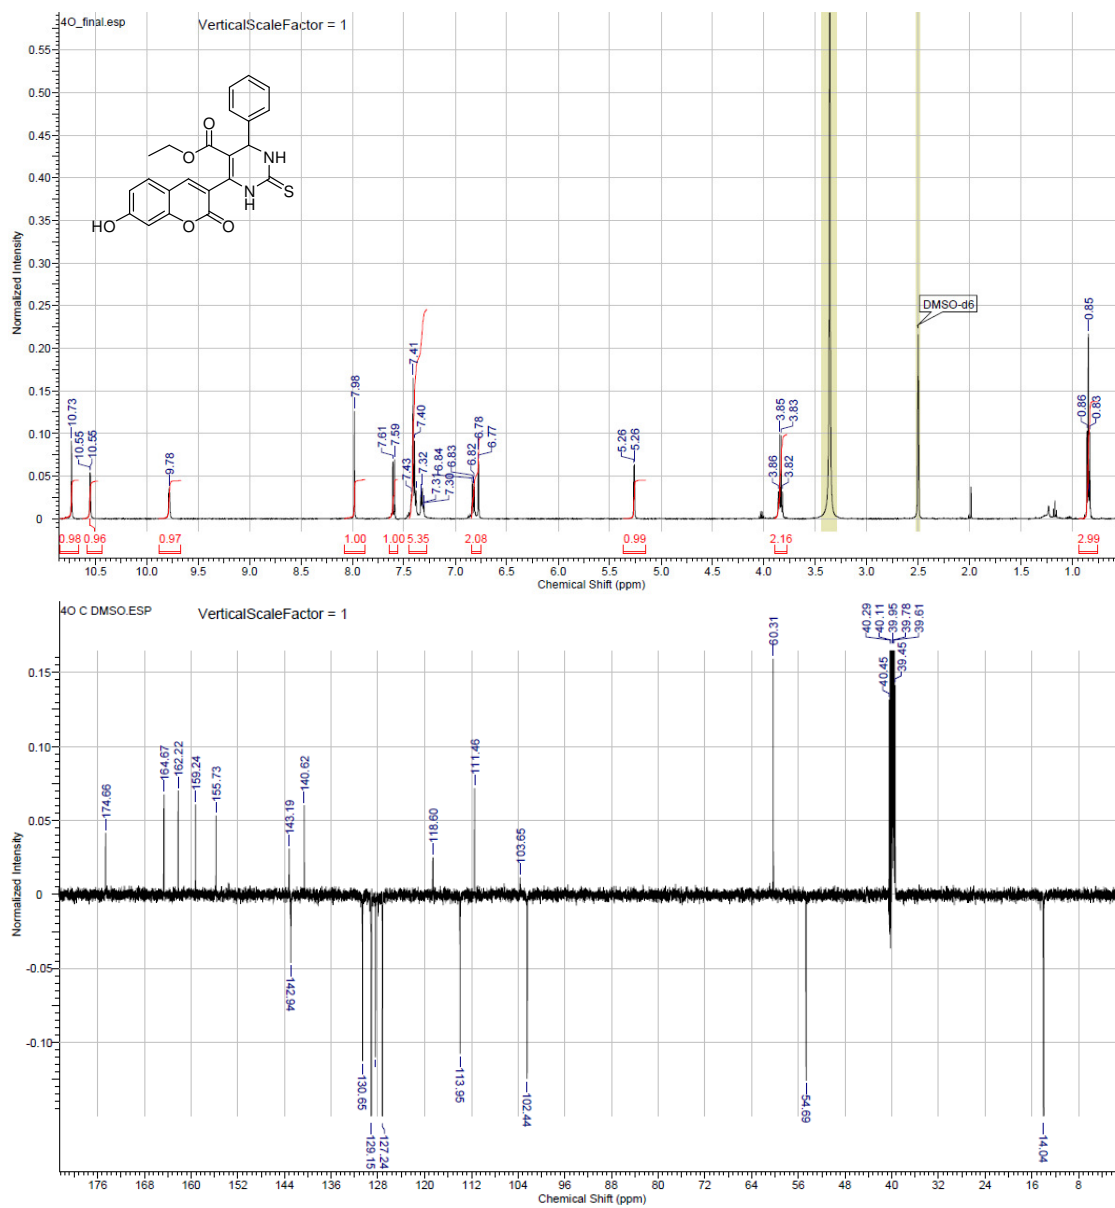

Fig. S33 <sup>1</sup>H NMR (500 MHz), <sup>13</sup>C NMR (125 MHz) spectra of **4o** in DMSO-*d*<sub>6</sub>.

**Acquisition Parameter**

|                   |             |              |           |                          |         |
|-------------------|-------------|--------------|-----------|--------------------------|---------|
| Ion Source Type   | ESI         | Ion Polarity | Negative  | Alternating Ion Polarity | off     |
| Mass Range Mode   | Enhanced    | Scan Begin   | 100 m/z   | Scan End                 | 700 m/z |
| Capillary Exit    | Resolution  | n/a          | n/a       | Trap Drive               | 68.9    |
| Accumulation Time | 413 $\mu$ s | Averages     | 5 Spectra | Auto MS/MS               | off     |

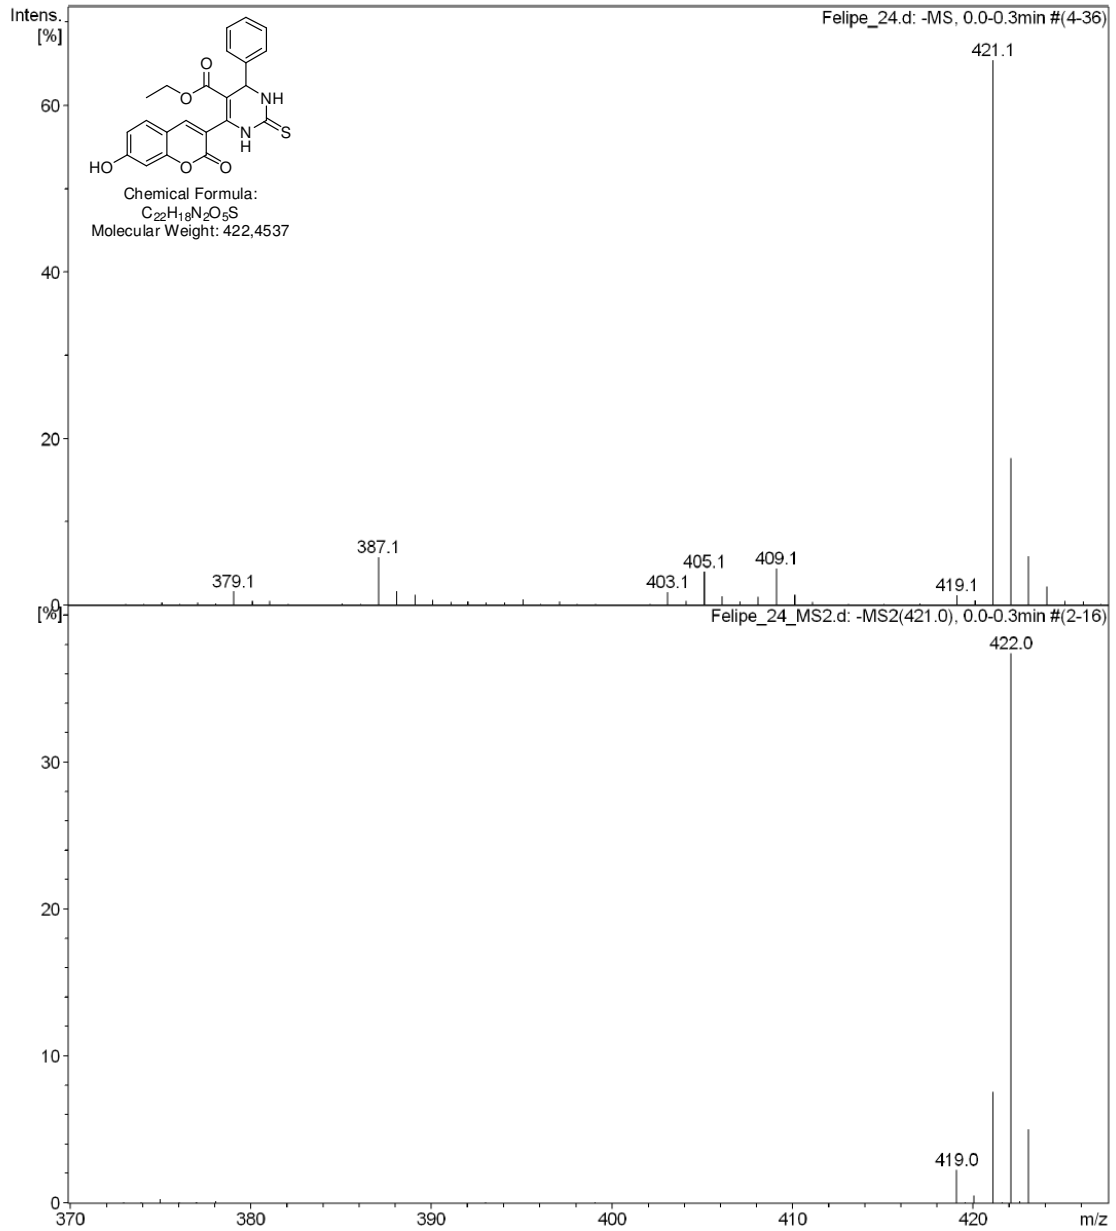Fig. S34 ESI spectra of **40**.

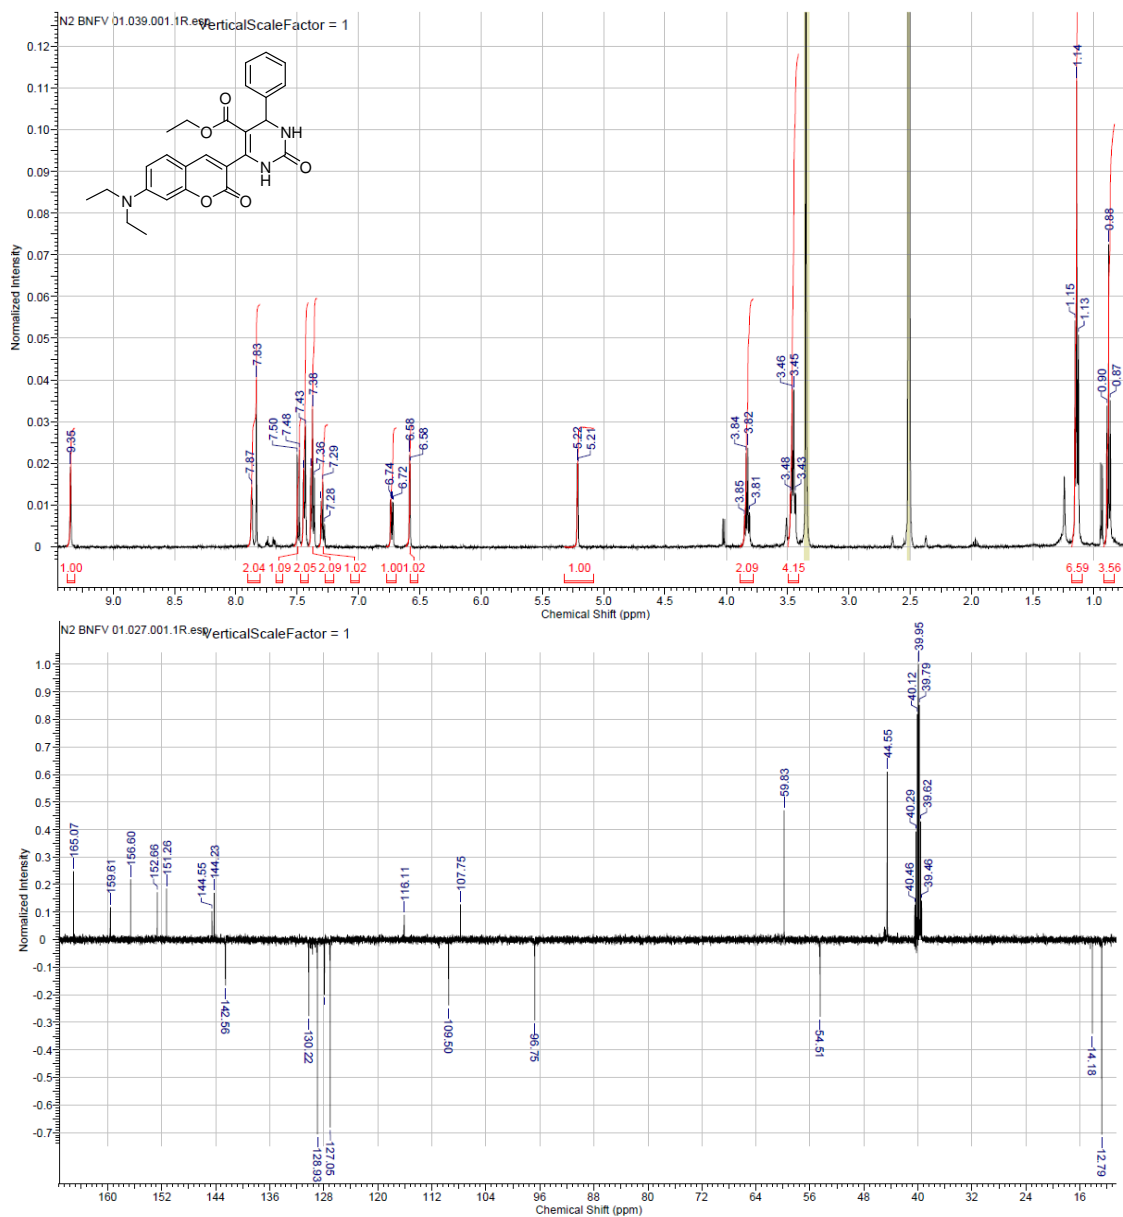

Fig. S35 <sup>1</sup>H NMR (500 MHz), <sup>13</sup>C NMR (125 MHz) spectra of **4p** in DMSO-*d*<sub>6</sub>.

**Acquisition Parameter**

|                   |              |              |           |                          |         |
|-------------------|--------------|--------------|-----------|--------------------------|---------|
| Ion Source Type   | ESI          | Ion Polarity | Negative  | Alternating Ion Polarity | off     |
| Mass Range Mode   | Enhanced     | Scan Begin   | 100 m/z   | Scan End                 | 700 m/z |
| Capillary Exit    | Resolution   | n/a          | n/a       | Trap Drive               | 68.9    |
| Accumulation Time | 2722 $\mu$ s | Averages     | 5 Spectra | Auto MS/MS               | off     |

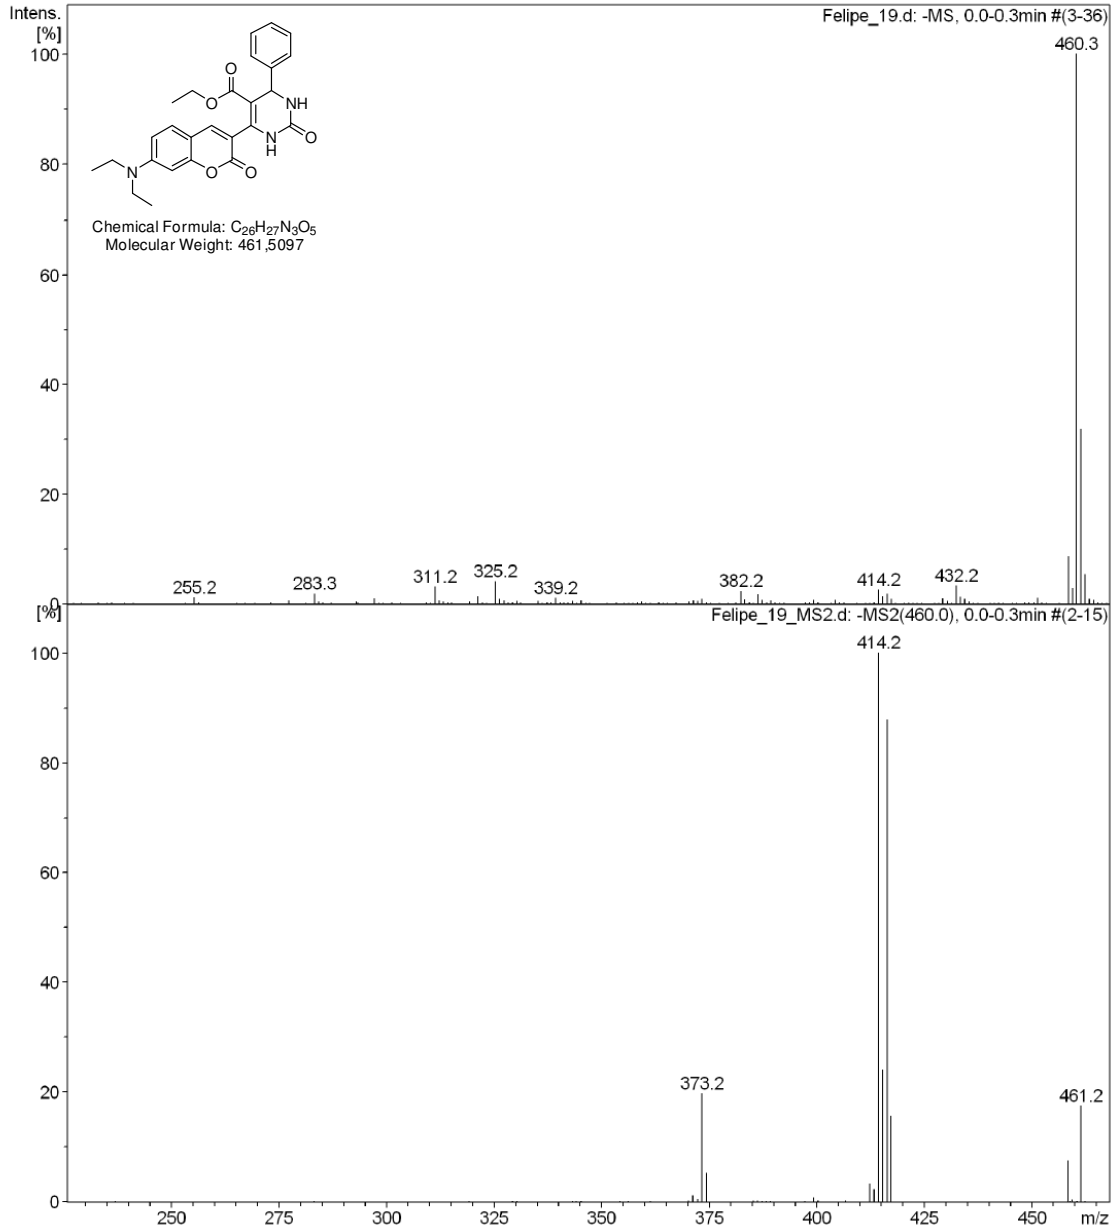Fig. S36 ESI spectra of **4p**.

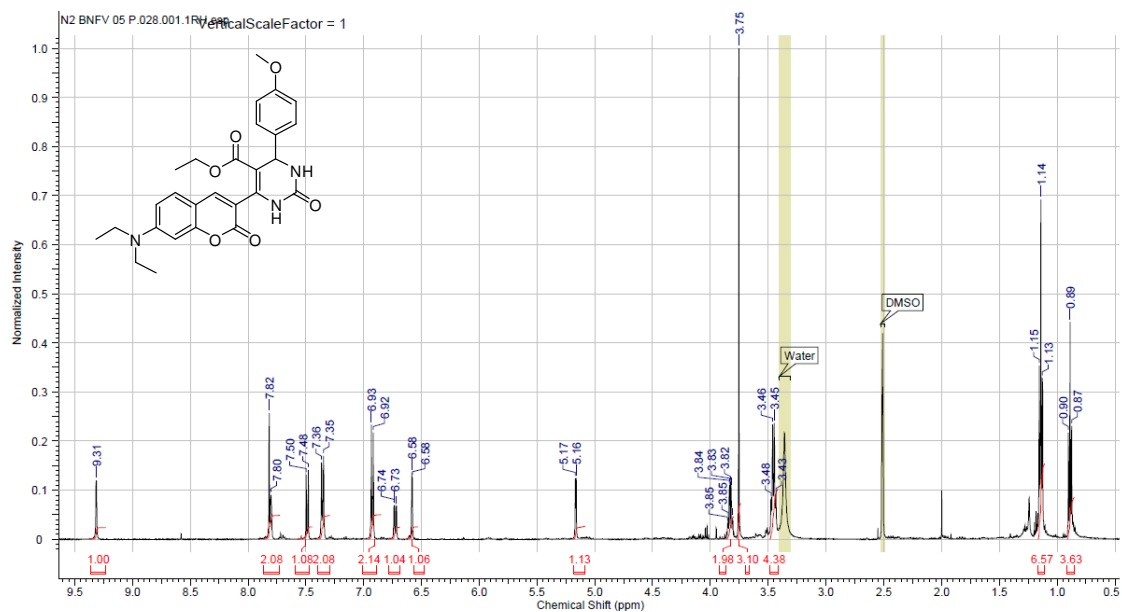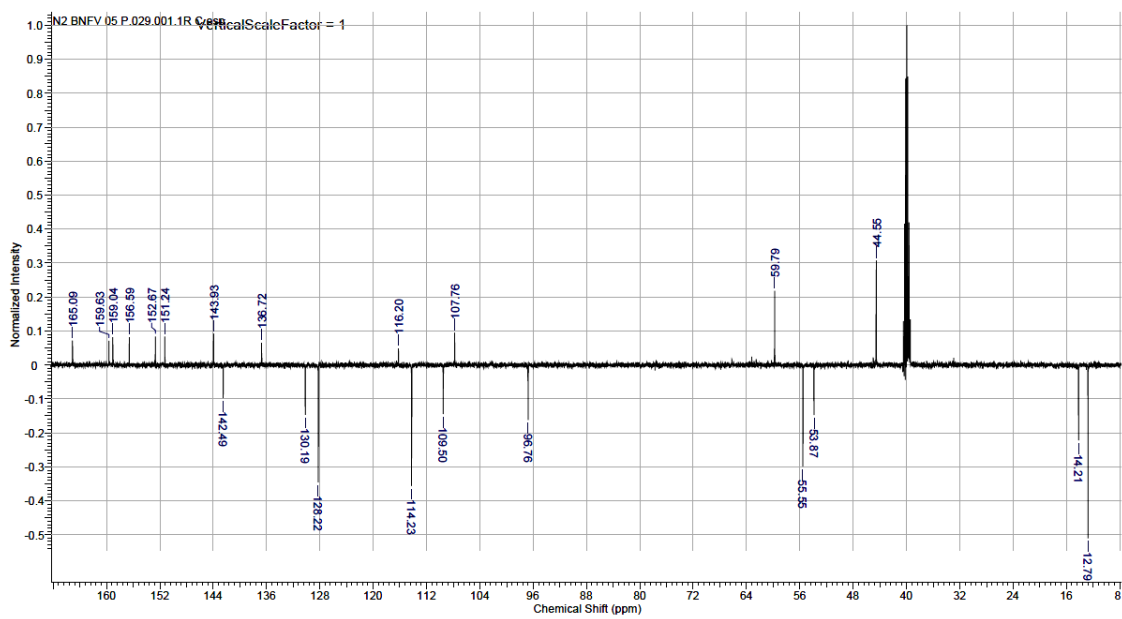

Fig. S37  $^1\text{H}$  NMR (500 MHz),  $^{13}\text{C}$  NMR (125 MHz) spectra of **4q** in  $\text{DMSO-}d_6$ .

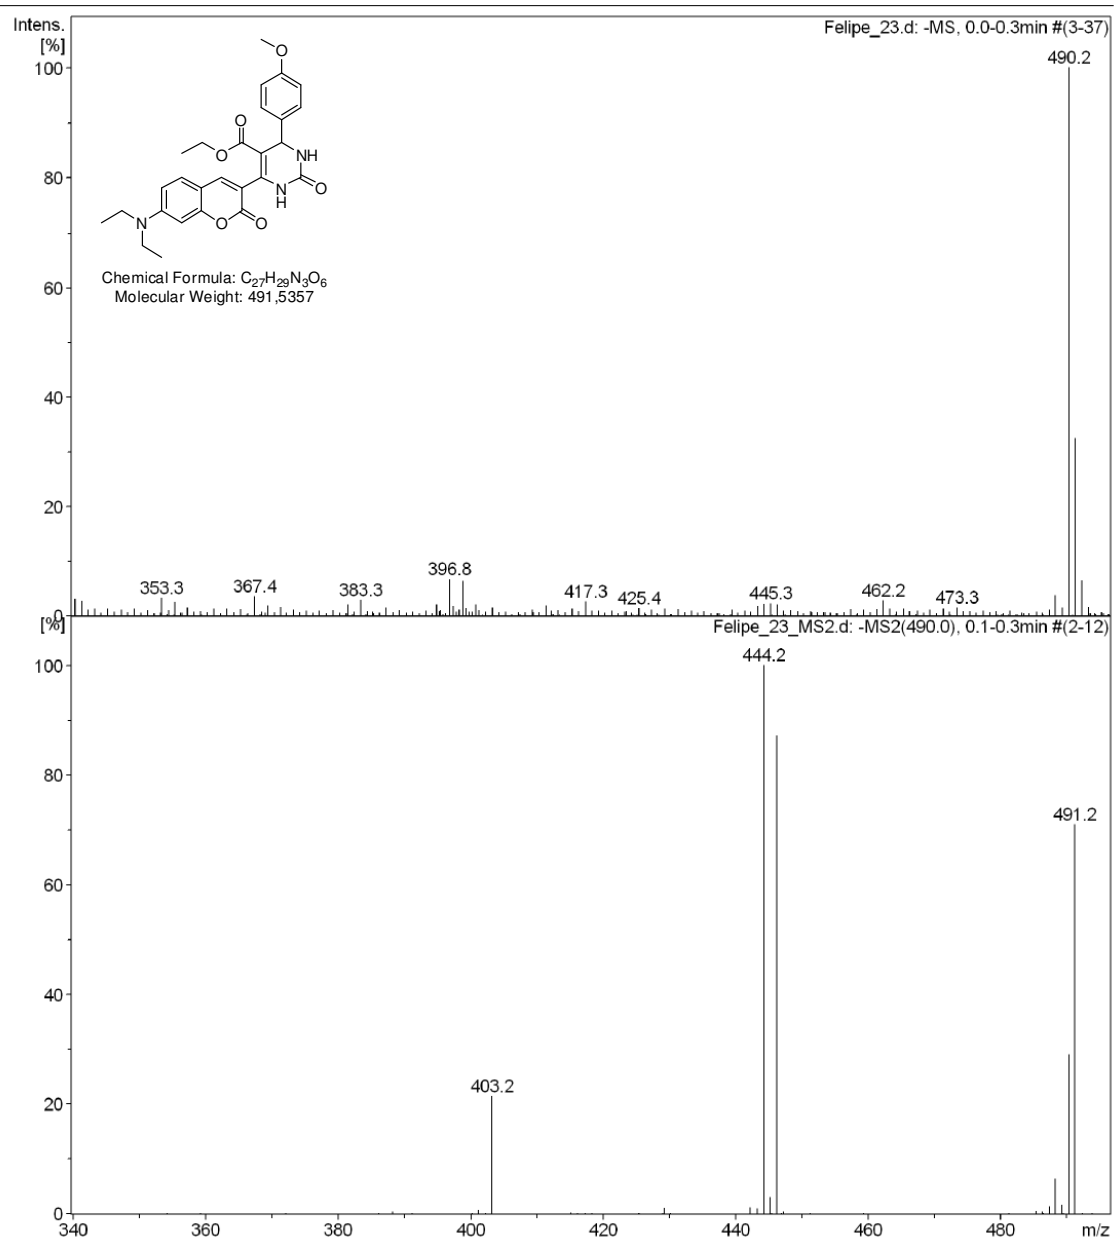

Fig. S38 ESI spectra of **4q**.

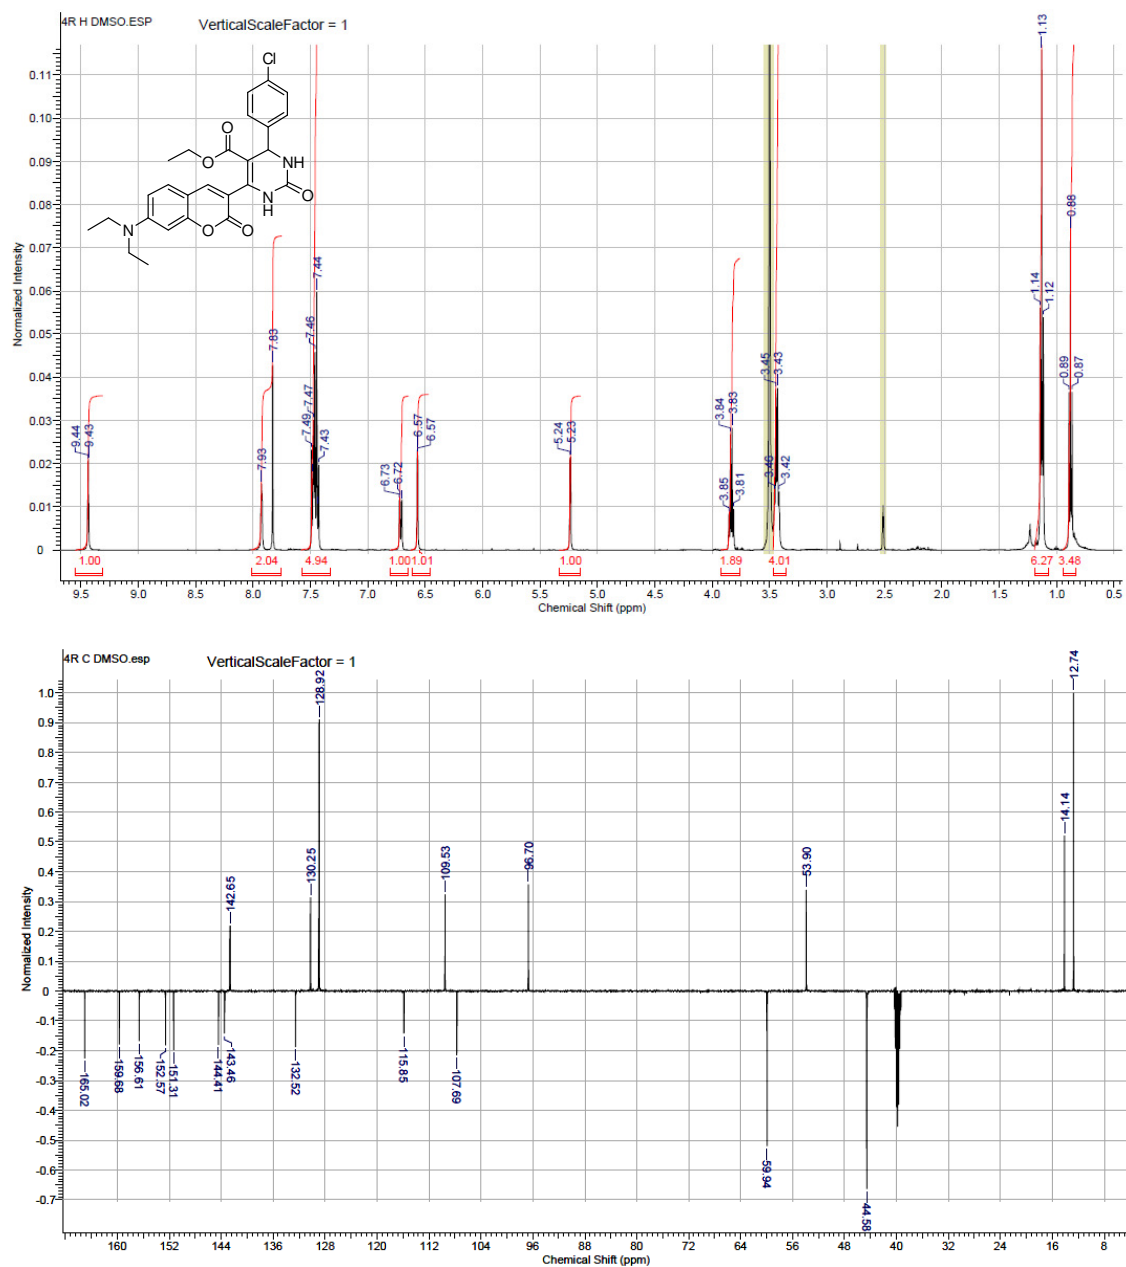

Fig. S39 <sup>1</sup>H NMR (500 MHz), <sup>13</sup>C NMR (125 MHz) spectra of **4r** in DMSO-*d*<sub>6</sub>.



**Acquisition Parameter**

|                   |               |              |           |                          |         |
|-------------------|---------------|--------------|-----------|--------------------------|---------|
| Ion Source Type   | ESI           | Ion Polarity | Negative  | Alternating Ion Polarity | off     |
| Mass Range Mode   | Enhanced      | Scan Begin   | 100 m/z   | Scan End                 | 700 m/z |
| Capillary Exit    | Resolution    | n/a          | n/a       | Trap Drive               | 68.9    |
| Accumulation Time | 74854 $\mu$ s | Averages     | 5 Spectra | Auto MS/MS               | off     |

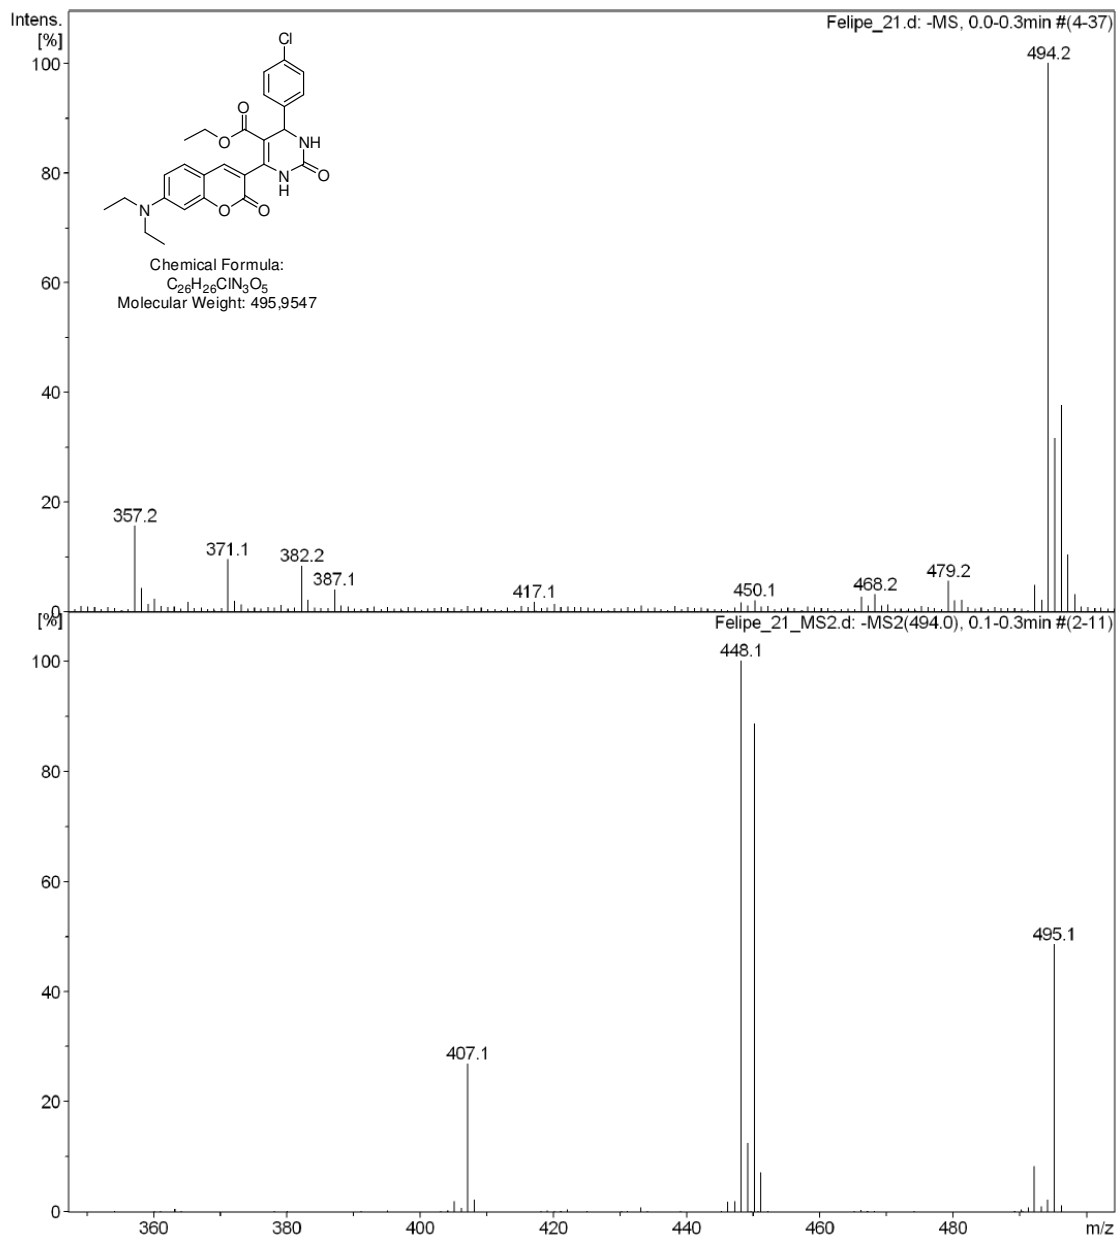Fig. S40 ESI spectra of **4r**.

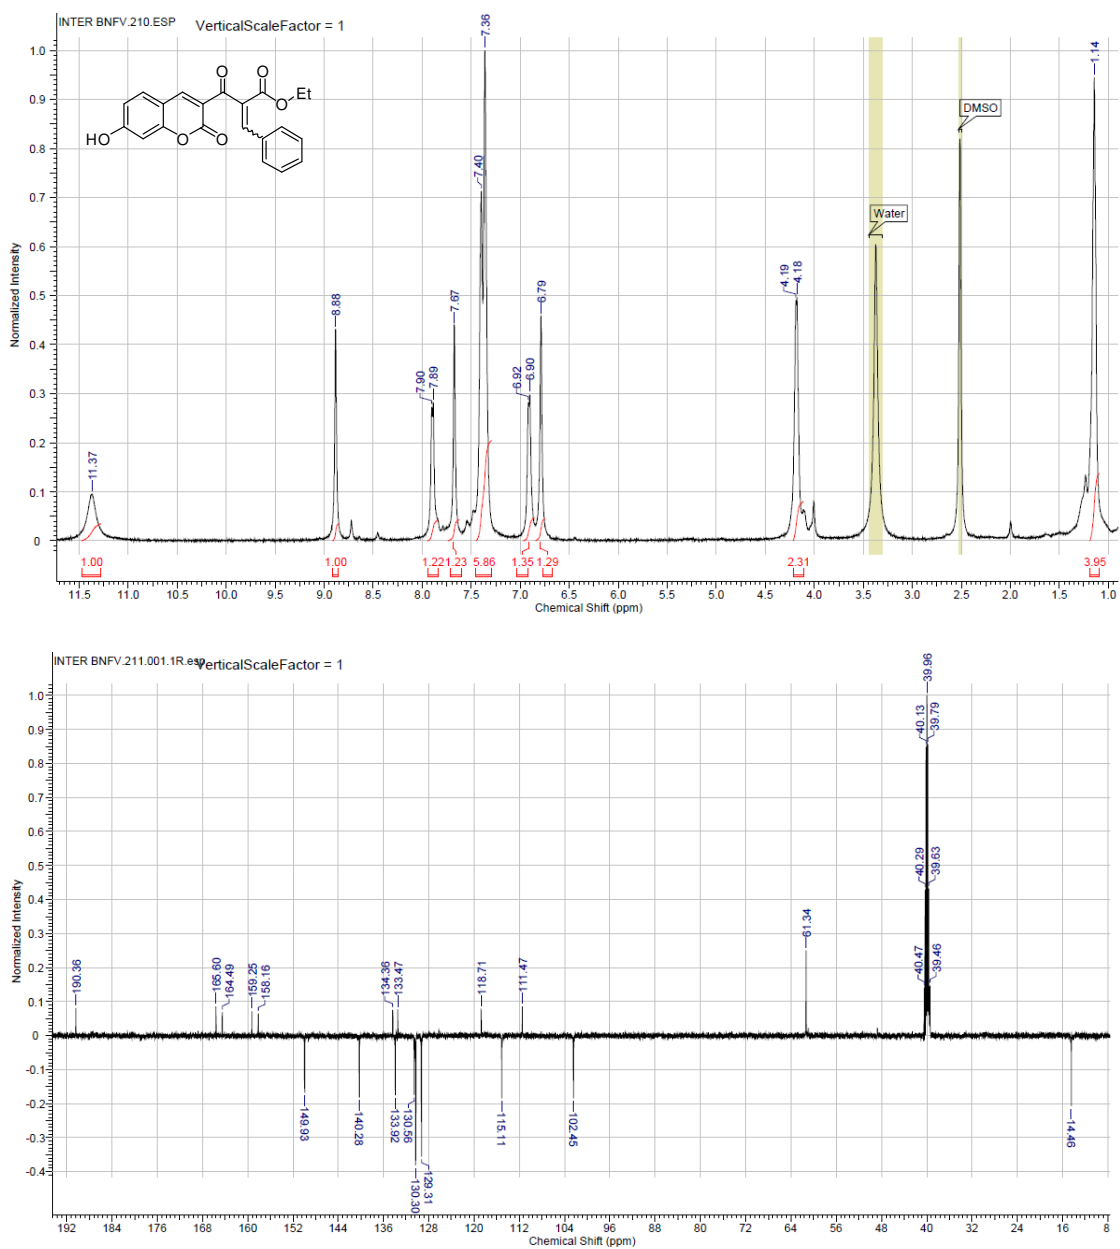

Fig. S41 <sup>1</sup>H NMR (500 MHz), <sup>13</sup>C NMR(125 MHz) spectra of **5** in DMSO-*d*<sub>6</sub>.

**Acquisition Parameter**

|                   |             |              |           |                          |         |
|-------------------|-------------|--------------|-----------|--------------------------|---------|
| Ion Source Type   | ESI         | Ion Polarity | Negative  | Alternating Ion Polarity | off     |
| Mass Range Mode   | Enhanced    | Scan Begin   | 100 m/z   | Scan End                 | 700 m/z |
| Capillary Exit    | Resolution  | n/a          | n/a       | Trap Drive               | 68.9    |
| Accumulation Time | 602 $\mu$ s | Averages     | 5 Spectra | Auto MS/MS               | off     |

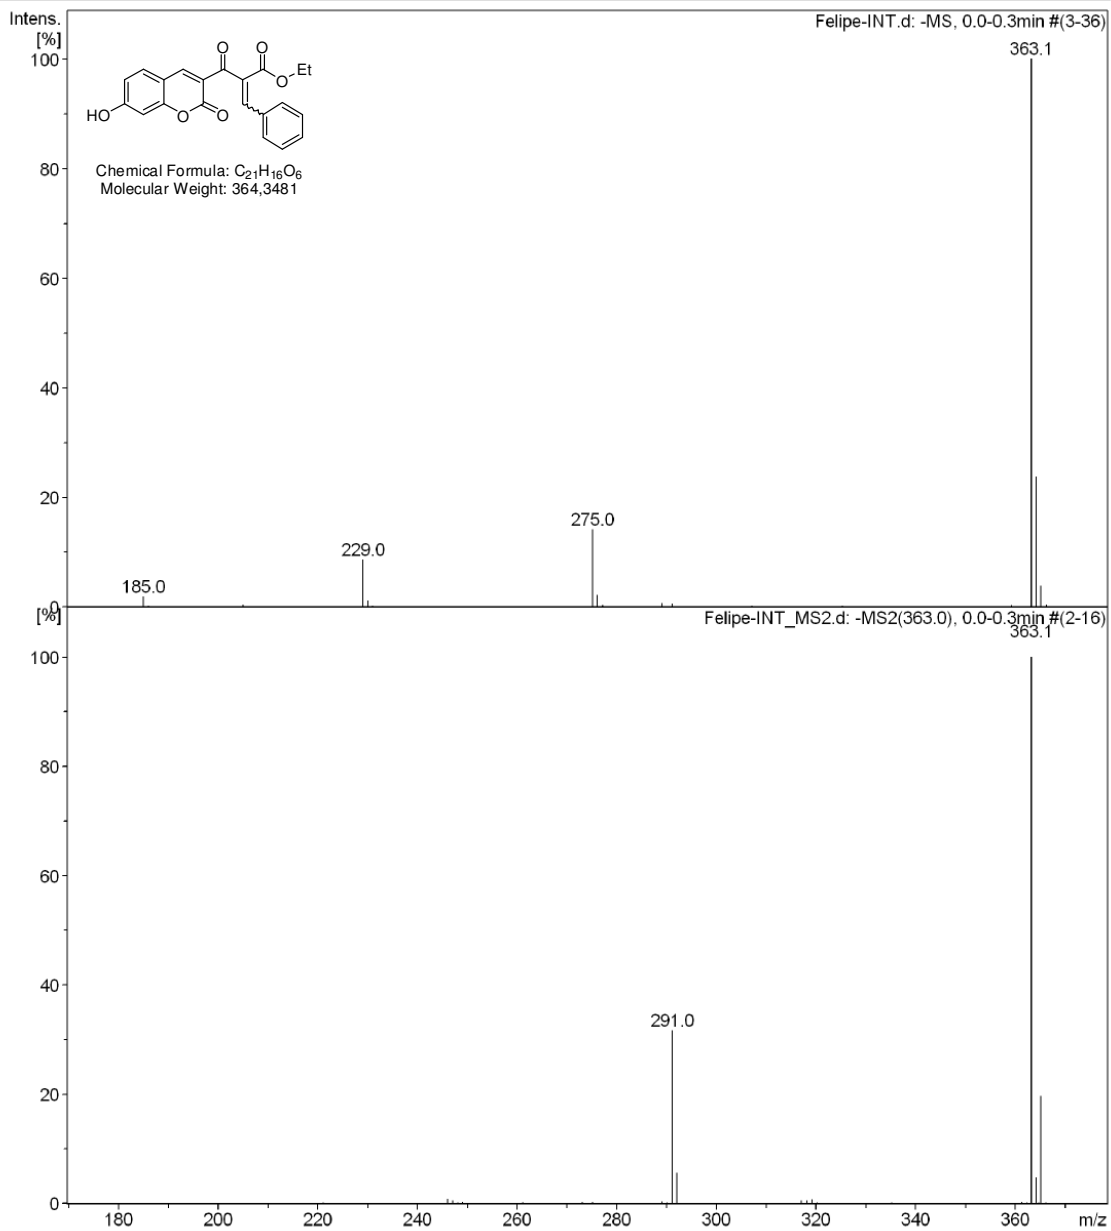

Fig. S42 ESI spectra of **5**.

HPLC data analysis

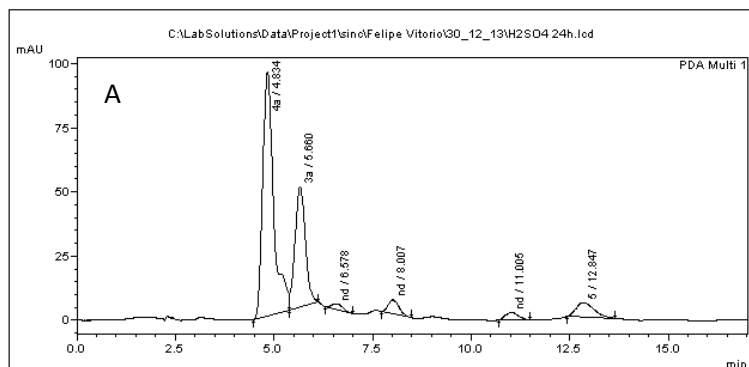

| PDA Ch1 370nm 4nm |           |         |          |
|-------------------|-----------|---------|----------|
| Name              | Ret. Time | Area %  | Height % |
| 4a                | 4.834     | 59.303  | 60.119   |
| 3a                | 5.660     | 28.032  | 29.618   |
| nd                | 6.578     | 1.338   | 1.428    |
| nd                | 8.007     | 3.399   | 3.462    |
| nd                | 11.005    | 2.075   | 1.775    |
| 5                 | 12.847    | 5.852   | 3.598    |
|                   |           | 100.000 | 100.000  |

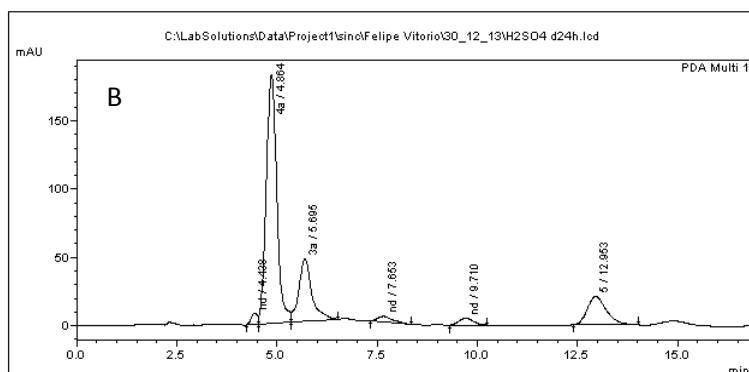

| PDA Ch1 370nm 4nm |           |         |          |
|-------------------|-----------|---------|----------|
| Name              | Ret. Time | Area %  | Height % |
| nd                | 4.438     | 1.602   | 3.106    |
| 4a                | 4.864     | 62.448  | 68.499   |
| 3a                | 5.695     | 18.934  | 17.237   |
| nd                | 7.653     | 1.937   | 1.495    |
| nd                | 9.710     | 2.315   | 1.889    |
| 5                 | 12.953    | 12.763  | 7.774    |
|                   |           | 100.000 | 100.000  |

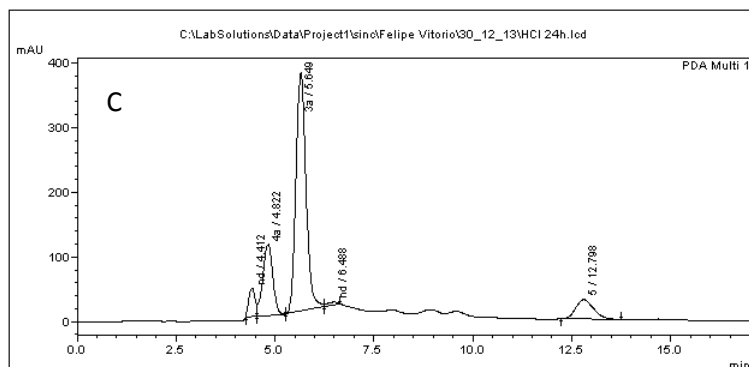

| PDA Ch1 370nm 4nm |           |         |          |
|-------------------|-----------|---------|----------|
| Name              | Ret. Time | Area %  | Height % |
| nd                | 4.412     | 4.922   | 7.927    |
| 4a                | 4.822     | 19.095  | 19.651   |
| 3a                | 5.649     | 65.719  | 66.310   |
| nd                | 6.488     | 0.796   | 0.731    |
| 5                 | 12.798    | 9.467   | 5.382    |
|                   |           | 100.000 | 100.000  |

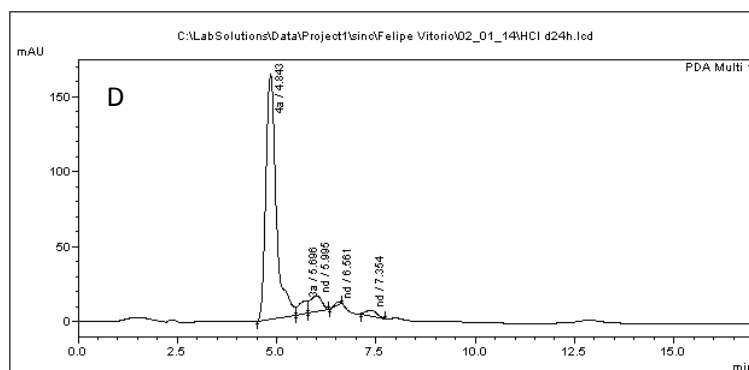

| PDA Ch1 370nm 4nm |           |         |          |
|-------------------|-----------|---------|----------|
| Name              | Ret. Time | Area %  | Height % |
| 4a                | 4.843     | 86.818  | 86.924   |
| 3a                | 5.606     | 4.098   | 4.432    |
| nd                | 5.995     | 6.416   | 5.692    |
| nd                | 6.561     | 0.681   | 1.077    |
| nd                | 7.354     | 1.988   | 1.875    |
|                   |           | 100.000 | 100.000  |

Fig. S43 Comparison of reaction catalyzed conditions. A – H<sub>2</sub>SO<sub>4</sub> (25 μL); B – H<sub>2</sub>SO<sub>4</sub> (12.5 μL); C – HCl (25 μL); D – HCl (12.5 μL). nd – not determined product.

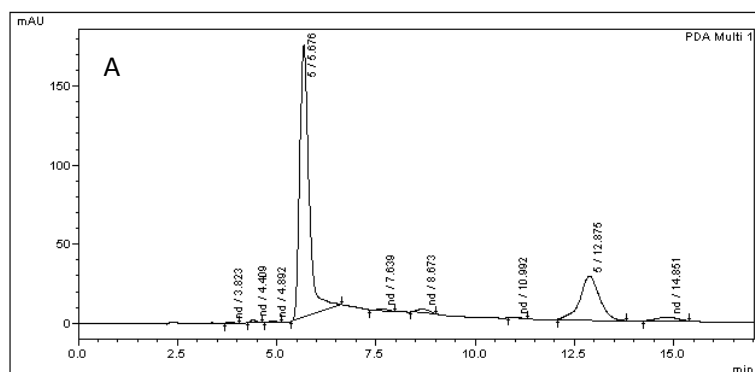

| PDA Ch1 370nm 4nm |           |         |          |
|-------------------|-----------|---------|----------|
| Name              | Ret. Time | Area %  | Height % |
| nd                | 3.823     | 0.203   | 0.394    |
| nd                | 4.409     | 0.448   | 0.786    |
| nd                | 4.892     | 0.253   | 0.313    |
| 5                 | 5.676     | 71.347  | 82.140   |
| nd                | 7.639     | 0.486   | 0.598    |
| nd                | 8.673     | 1.231   | 1.113    |
| nd                | 10.992    | 0.195   | 0.202    |
| 5                 | 12.875    | 23.688  | 13.281   |
| nd                | 14.851    | 2.148   | 1.172    |
|                   |           | 100.000 | 100.000  |

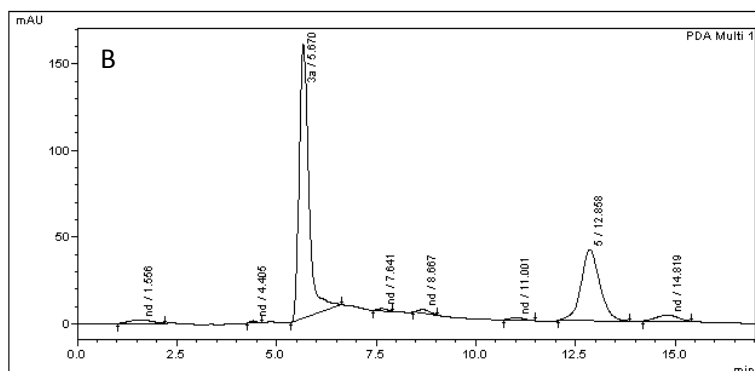

| PDA Ch1 370nm 4nm |           |         |          |
|-------------------|-----------|---------|----------|
| Name              | Ret. Time | Area %  | Height % |
| nd                | 1.556     | 2.104   | 1.059    |
| nd                | 4.405     | 0.346   | 0.654    |
| 3a                | 5.670     | 61.588  | 74.874   |
| nd                | 7.641     | 0.425   | 0.573    |
| nd                | 8.667     | 1.034   | 1.020    |
| nd                | 11.001    | 0.805   | 0.706    |
| 5                 | 12.858    | 30.823  | 19.480   |
| nd                | 14.819    | 2.875   | 1.635    |
|                   |           | 100.000 | 100.000  |

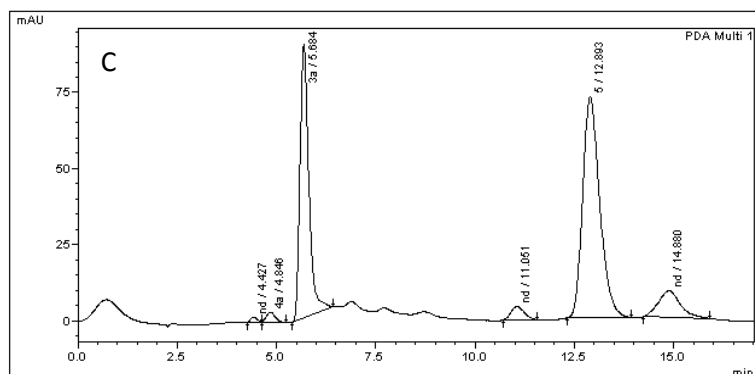

| PDA Ch1 370nm 4nm |           |         |          |
|-------------------|-----------|---------|----------|
| Name              | Ret. Time | Area %  | Height % |
| nd                | 4.427     | 0.501   | 0.949    |
| 4a                | 4.846     | 1.322   | 1.860    |
| 3a                | 5.684     | 34.330  | 49.686   |
| nd                | 11.051    | 2.540   | 2.447    |
| 5                 | 12.893    | 53.004  | 40.219   |
| nd                | 14.880    | 8.302   | 4.838    |
|                   |           | 100.000 | 100.000  |

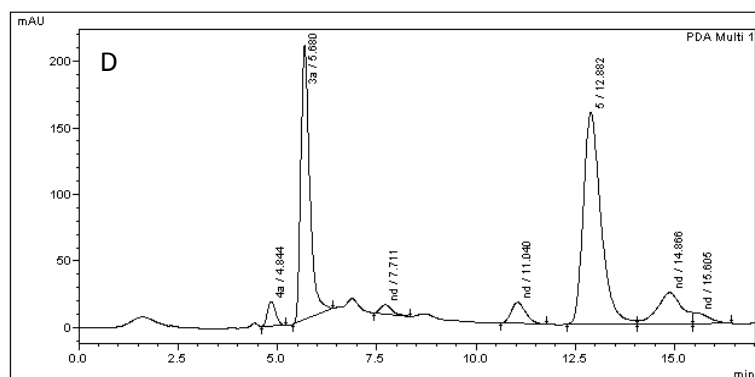

| PDA Ch1 370nm 4nm |           |         |          |
|-------------------|-----------|---------|----------|
| Name              | Ret. Time | Area %  | Height % |
| 4a                | 4.844     | 2.614   | 4.204    |
| 3a                | 5.680     | 31.783  | 47.102   |
| nd                | 7.711     | 1.274   | 1.555    |
| nd                | 11.040    | 3.920   | 3.610    |
| 5                 | 12.882    | 48.302  | 36.409   |
| nd                | 14.866    | 9.913   | 5.335    |
| nd                | 15.605    | 2.194   | 1.785    |
|                   |           | 100.000 | 100.000  |

Fig. S44 Reaction conditions: non-catalyzed. A – 2 hours time reaction; B – 4 hours time reaction and D – 24 hours time reaction and C – 10 hours time reaction; nd – not determinate.

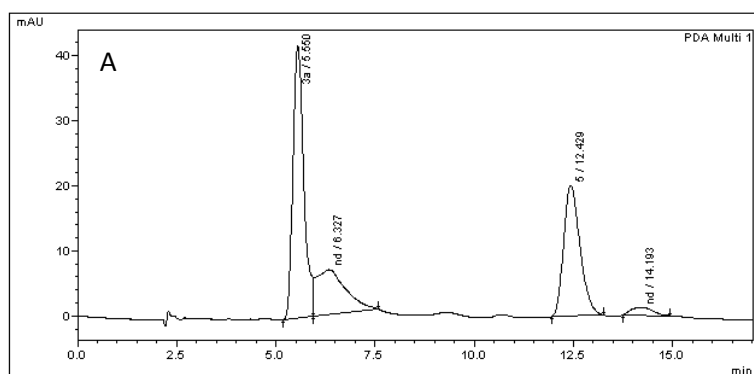

| PDA Ch1 370nm 4nm |           |         |          |
|-------------------|-----------|---------|----------|
| Name              | Ret. Time | Area %  | Height % |
| 3a                | 5.550     | 45.178  | 59.719   |
| nd                | 6.327     | 19.925  | 9.895    |
| 5                 | 12.429    | 32.365  | 28.653   |
| nd                | 14.193    | 2.532   | 1.733    |
|                   |           | 100.000 | 100.000  |

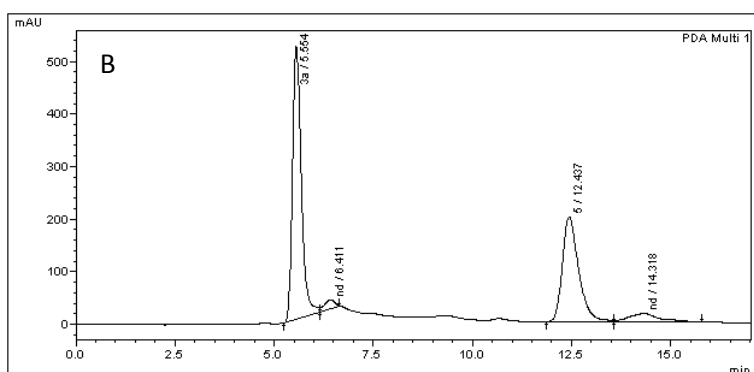

| PDA Ch1 370nm 4nm |           |         |          |
|-------------------|-----------|---------|----------|
| Name              | Ret. Time | Area %  | Height % |
| 3a                | 5.554     | 54.136  | 69.060   |
| nd                | 6.411     | 2.022   | 2.236    |
| 5                 | 12.437    | 38.253  | 26.595   |
| nd                | 14.318    | 5.589   | 2.110    |
|                   |           | 100.000 | 100.000  |

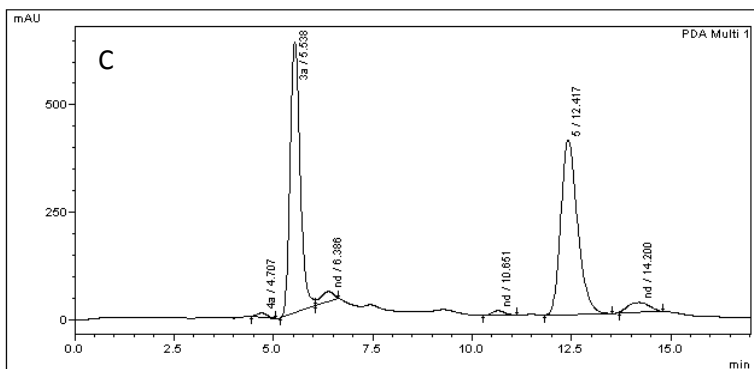

| PDA Ch1 370nm 4nm |           |         |          |
|-------------------|-----------|---------|----------|
| Name              | Ret. Time | Area %  | Height % |
| 4a                | 4.707     | 0.658   | 0.855    |
| 3a                | 5.538     | 44.979  | 57.166   |
| nd                | 6.386     | 2.143   | 2.095    |
| nd                | 10.651    | 0.943   | 0.950    |
| 5                 | 12.417    | 47.954  | 36.933   |
| nd                | 14.200    | 3.322   | 2.000    |
|                   |           | 100.000 | 100.000  |

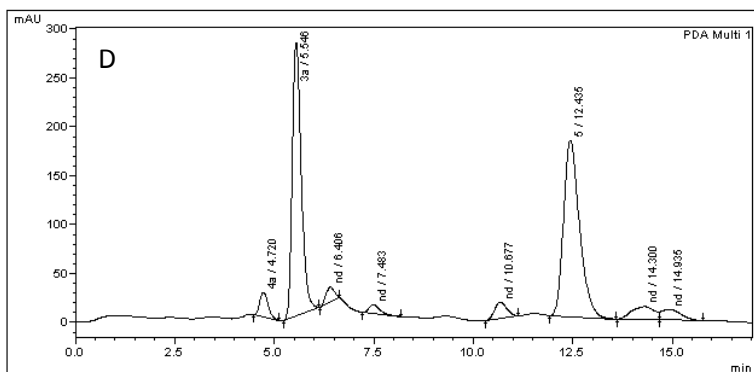

| PDA Ch1 370nm 4nm |           |         |          |
|-------------------|-----------|---------|----------|
| Name              | Ret. Time | Area %  | Height % |
| 4a                | 4.720     | 3.127   | 4.486    |
| 3a                | 5.546     | 38.422  | 50.794   |
| nd                | 6.406     | 1.985   | 2.795    |
| nd                | 7.483     | 1.458   | 1.599    |
| nd                | 10.677    | 3.192   | 3.100    |
| 5                 | 12.435    | 43.994  | 32.830   |
| nd                | 14.300    | 4.559   | 2.396    |
| nd                | 14.935    | 3.264   | 2.002    |
|                   |           | 100.000 | 100.000  |

Fig. S45 Reaction conditions: acetic acid as catalyst. A – 2 hours time reaction; B – 4 hours time reaction; C – 10 hours time reaction and D – 24 hours time reaction; nd – not determined.

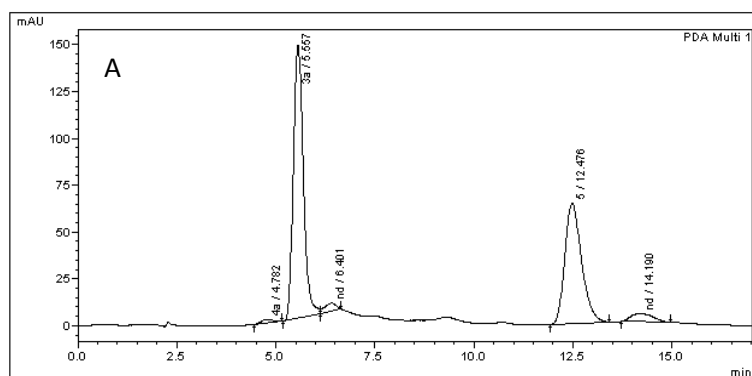

| PDA Ch1 370nm 4nm |           |         |          |
|-------------------|-----------|---------|----------|
| Name              | Ret. Time | Area %  | Height % |
| 4a                | 4.782     | 0.800   | 0.850    |
| 3a                | 5.557     | 54.077  | 66.101   |
| nd                | 6.401     | 1.758   | 1.838    |
| 5                 | 12.476    | 39.740  | 29.225   |
| nd                | 14.190    | 3.625   | 1.986    |
|                   |           | 100.000 | 100.000  |

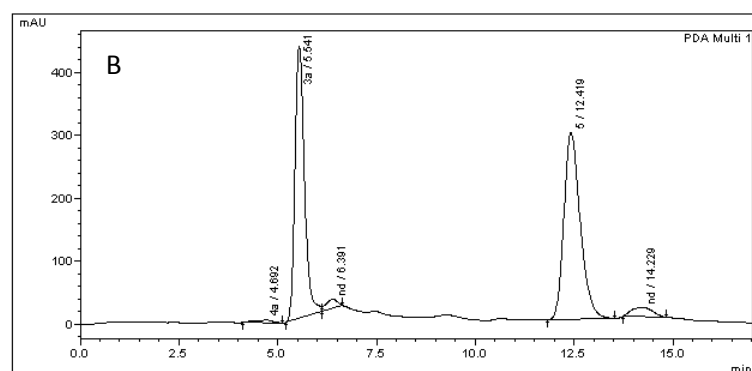

| PDA Ch1 370nm 4nm |           |         |          |
|-------------------|-----------|---------|----------|
| Name              | Ret. Time | Area %  | Height % |
| 4a                | 4.692     | 0.712   | 0.548    |
| 3a                | 5.541     | 43.293  | 56.659   |
| nd                | 6.391     | 1.788   | 1.913    |
| 5                 | 12.419    | 50.800  | 38.905   |
| nd                | 14.229    | 3.406   | 1.975    |
|                   |           | 100.000 | 100.000  |

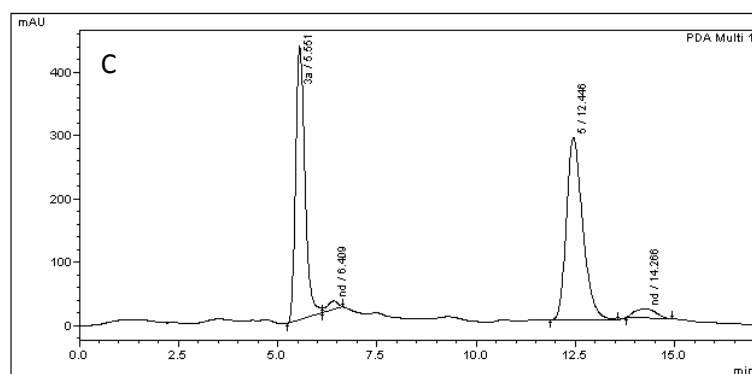

| PDA Ch1 370nm 4nm |           |         |          |
|-------------------|-----------|---------|----------|
| Name              | Ret. Time | Area %  | Height % |
| 3a                | 5.551     | 44.153  | 57.820   |
| nd                | 6.409     | 1.617   | 1.802    |
| 5                 | 12.446    | 50.972  | 38.501   |
| nd                | 14.266    | 3.258   | 1.877    |
|                   |           | 100.000 | 100.000  |

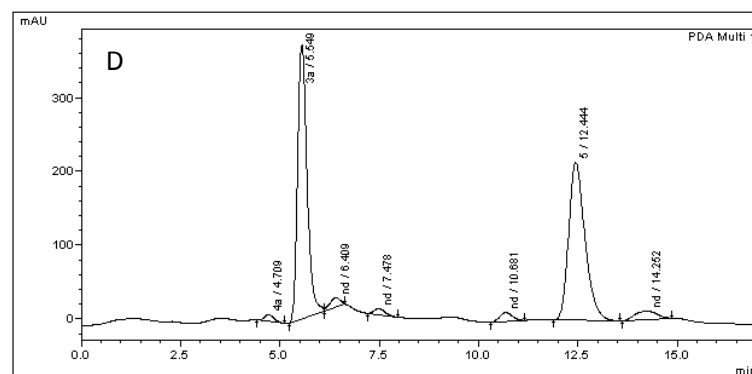

| PDA Ch1 370nm 4nm |           |         |          |
|-------------------|-----------|---------|----------|
| Name              | Ret. Time | Area %  | Height % |
| 4a                | 4.709     | 1.044   | 1.352    |
| 3a                | 5.549     | 45.747  | 58.294   |
| nd                | 6.409     | 1.720   | 1.954    |
| nd                | 7.478     | 1.140   | 1.279    |
| nd                | 10.681    | 1.947   | 1.872    |
| 5                 | 12.444    | 45.294  | 33.562   |
| nd                | 14.252    | 3.109   | 1.687    |
|                   |           | 100.000 | 100.000  |

Fig. S46 Reaction conditions: Lewis acid as catalyst ( $\text{CaF}_2$ ): A – 2 hours time reaction; B – 4 hours time reaction; C – 10 hours time reaction and D – 24 hours time reaction; nd – not determined.

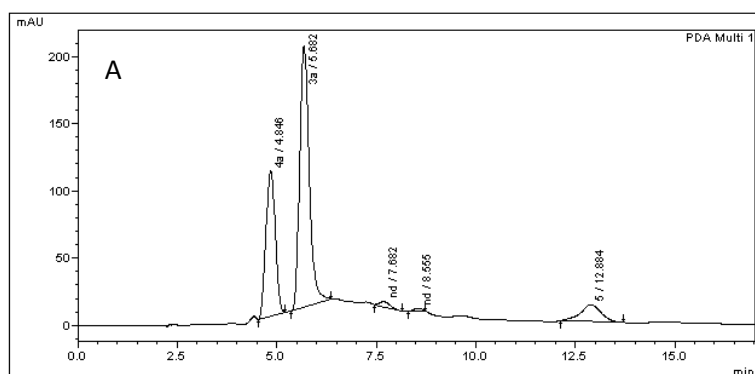

| PDA Ch1 370nm 4nm |           |         |          |
|-------------------|-----------|---------|----------|
| Name              | Ret. Time | Area %  | Height % |
| 4a                | 4.846     | 31.880  | 33.746   |
| 3a                | 5.682     | 58.137  | 60.544   |
| nd                | 7.682     | 1.225   | 1.144    |
| nd                | 8.555     | 0.538   | 0.620    |
| 5                 | 12.884    | 8.220   | 3.945    |
|                   |           | 100.000 | 100.000  |

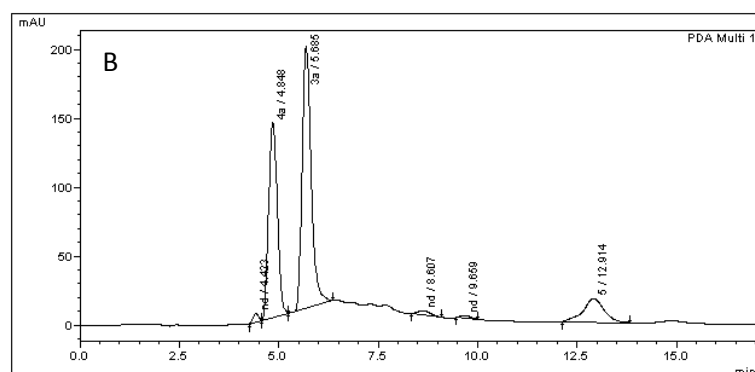

| PDA Ch1 370nm 4nm |           |         |          |
|-------------------|-----------|---------|----------|
| Name              | Ret. Time | Area %  | Height % |
| nd                | 4.423     | 1.018   | 1.770    |
| 4a                | 4.848     | 36.175  | 39.383   |
| 3a                | 5.685     | 50.599  | 52.732   |
| nd                | 8.607     | 1.223   | 0.862    |
| nd                | 9.659     | 0.586   | 0.529    |
| 5                 | 12.914    | 10.399  | 4.724    |
|                   |           | 100.000 | 100.000  |

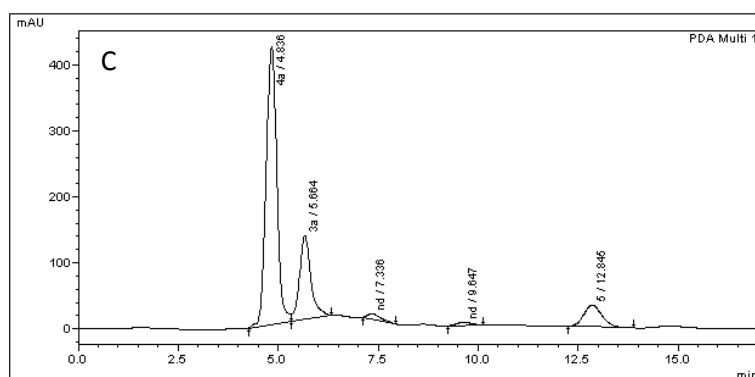

| PDA Ch1 370nm 4nm |           |         |          |
|-------------------|-----------|---------|----------|
| Name              | Ret. Time | Area %  | Height % |
| 4a                | 4.836     | 66.784  | 70.806   |
| 3a                | 5.664     | 21.578  | 21.415   |
| nd                | 7.336     | 1.685   | 1.390    |
| nd                | 9.647     | 1.029   | 0.816    |
| 5                 | 12.845    | 8.924   | 5.573    |
|                   |           | 100.000 | 100.000  |

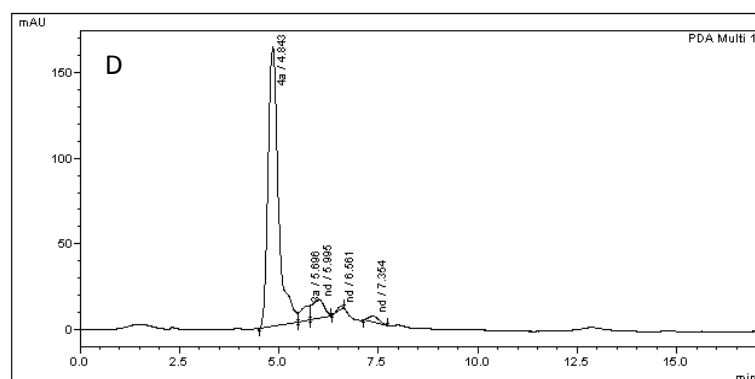

| PDA Ch1 370nm 4nm |           |         |          |
|-------------------|-----------|---------|----------|
| Name              | Ret. Time | Area %  | Height % |
| 4a                | 4.843     | 86.818  | 86.924   |
| 3a                | 5.696     | 4.098   | 4.432    |
| nd                | 5.995     | 6.416   | 5.692    |
| nd                | 6.561     | 0.681   | 1.077    |
| nd                | 7.354     | 1.988   | 1.875    |
|                   |           | 100.000 | 100.000  |

Fig. S47 Reaction conditions: HCl as catalyst (12.5 $\mu$ L): A – 2 hours time reaction; B – 4 hours time reaction; C – 10 hours time reaction and D – 24 hours time reaction; nd – not determined.



## X-ray diffraction

Single crystal X-ray diffraction data for compound **4c** were collected on an Bruker D8 Venture diffractometer at room temperature, using graphite monochromatic MoK $\alpha$  radiation ( $\lambda = 0.71069 \text{ \AA}$ ). Data collection and cell refinement were performed with Bruker Instrument Service v4.2.2 and APEX2 [i], respectively. Data reduction was carried out using SAINT [ii]. Empirical multiscan absorption correction using equivalent reflections was performed with the SADABS program [iii]. The structure solutions and full-matrix least-squares refinements based on  $F^2$  were performed with the SHELXS-97 and SHELXL-97 program packages [iv]. All atoms except hydrogen were refined anisotropically. Hydrogen atoms were treated by a mixture of independent and constrained refinement. The structure was drawn by Mercury program [v]. Details of data collection and refinement are listed in Table S1.

**Table S1:** Summary of crystal data and structure refinement of compound **4c**.

|                        |                                  |                            |
|------------------------|----------------------------------|----------------------------|
| Empirical formula      | $C_{49}H_{36}N_4O_{14}$          |                            |
| Formula weight         | 904.82                           |                            |
| Temperature            | 293(2) K                         |                            |
| Wavelength             | 0.71073 $\text{\AA}$             |                            |
| Crystal system         | Triclinic                        |                            |
| Space group            | $P - 1$                          |                            |
| Unit cell dimensions   | $a = 9.2503(5) \text{ \AA}$      | $\alpha = 76.141(2)^\circ$ |
|                        | $b = 10.6790(6) \text{ \AA}$     | $\beta = 77.031(2)^\circ$  |
|                        | $c = 13.4211(6) \text{ \AA}$     | $\gamma = 64.664(2)^\circ$ |
| Volume                 | 1152.10(10) $\text{\AA}^3$       |                            |
| Z                      | 1                                |                            |
| Density (calculated)   | 1.304 $\text{Mg/m}^3$            |                            |
| Absorption coefficient | 0.10 $\text{mm}^{-1}$            |                            |
| F(000)                 | 470                              |                            |
| Crystal size           | 0.28 x 0.17 x 0.05 $\text{mm}^3$ |                            |

|                                 |                                                 |
|---------------------------------|-------------------------------------------------|
| Theta range for data collection | 2.1 to 25.0°                                    |
| Index ranges                    | -10 ≤ h ≤ 10,<br>-12 ≤ k ≤ 12,<br>-15 ≤ l ≤ 15  |
| Reflections collected           | 32147                                           |
| Independent reflections         | 4053 [R(int) = 0.075]                           |
| Completeness to theta = 25.06°  | 100 %                                           |
| Max. and min. transmission      | 0.980 and 0.995                                 |
| Refinement method               | Full-matrix least-squares on $F^2$              |
| Data / restraints / parameters  | 4048 / 0 / 312                                  |
| Goodness-of-fit on $F^2$        | 1.06                                            |
| Final R indices [I > 2σ(I)]     | R <sub>1</sub> = 0.062, wR <sub>2</sub> = 0.199 |
| R indices (all data)            | R <sub>1</sub> = 0.099, wR <sub>2</sub> = 0.171 |
| Largest diff. peak and hole     | 0.52 and -0.23 e.Å <sup>-3</sup>                |

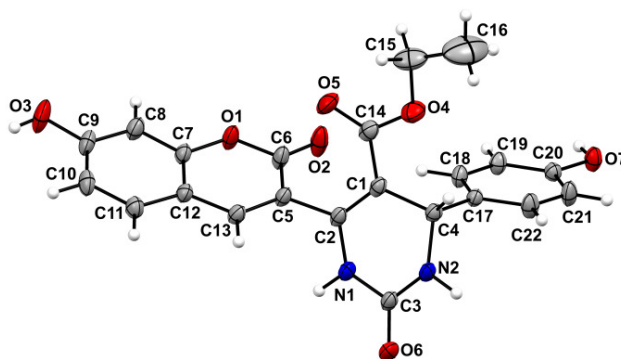

Fig. S48 Molecular structure of compound **4c**. Thermal ellipsoids are drawn at 40 % of probability. Crystallization solvent molecule was omitted for sake of clarity.

[<sup>i</sup>] Bruker (2007). APEX2 v2014.5-0. Bruker AXS Inc., Madison, Wisconsin, USA.

[<sup>ii</sup>] Bruker (2013). SAINT v8.34A. Bruker AXS Inc., Madison, Wisconsin, USA.

[<sup>iii</sup>] Sheldrick, G.M. SADABS, Program for Empirical Absorption Correction of Area Detector Data, University of Göttingen, Germany, 1996.

[<sup>iv</sup>] Sheldrick, G.M. *Acta Cryst.* **2008**, *A64*, 112-122.

---

[<sup>v</sup>]Macrae, C. F., Edgington, P. R., McCabe, P., Pidcock, E., Shields, G. P., Taylor, R., Towler, M. & van de Streek, J., *J. Appl. Cryst.* **2006**, 39, 453-457.
